# Supplementary material for: MICa/b‐dependent activation of natural killer cells by CD64 + inflammatory type 2 dendritic cells contributes to autoimmunity
Source: PubMed Central journal article supplement (PMC10690448; doi:10.15252/embj.2023113714), 2023-11-02
Supplement: EMBJ-42-e113714-s001.pdf [file EMBJ-42-e113714-s001.pdf]

Table of contents:

- Appendix Figure S1 and legend.....Page 2-3
- Appendix Figure S2 and legend.....Page 4-5
- Appendix Figure S3 and legend.....Page 6-7
- Appendix Figure S4 and legend.....Page 8-9
- Appendix Figure S5 and legend.....Page 10-11
- Appendix Figure S6 and legend.....Page 12-13
- Appendix Figure S7 and legend.....Page 14-15
- Appendix Figure S8 and legend.....Page 16-17
- Appendix Figure S9 and legend.....Page 18-19
- Appendix Figure S10 and legend.....Page 20-21
- Appendix Table S1 and legend.....Page 22-23
- Appendix Table S2 and legend.....Page 24
- Appendix Table S3 and legend.....Page 25
- Appendix Table S4 and legend.....Page 26-96
- Appendix Table S5 and legend.....Page 97-100

# Appendix Figure S1

A

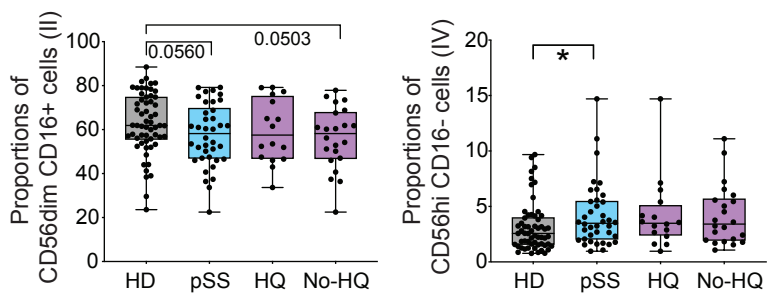

B

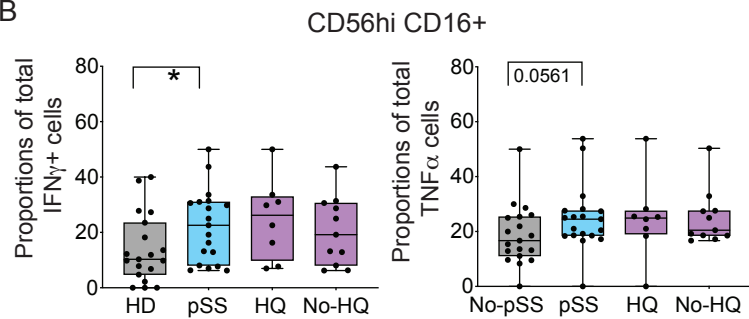

C

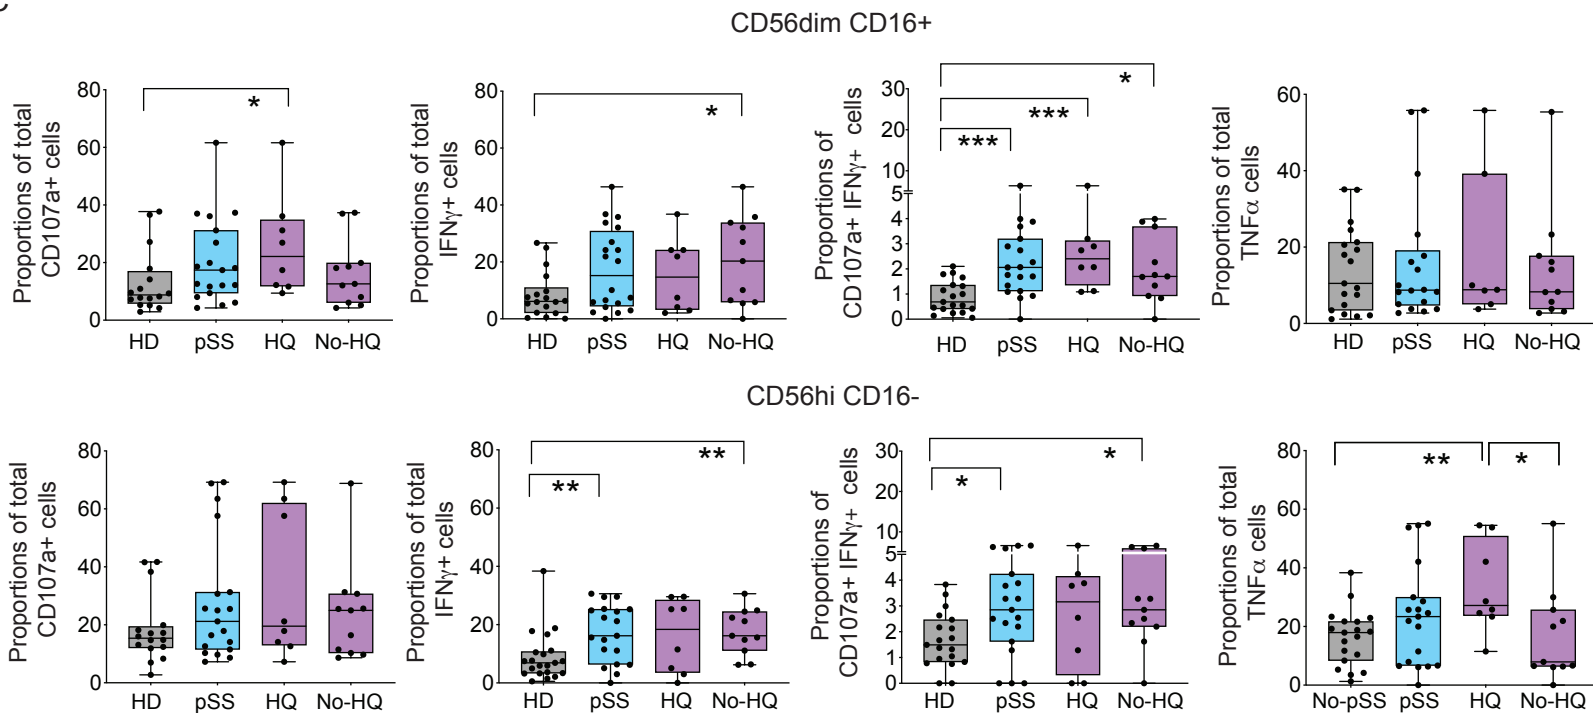

**Appendix Figure S1. Phenotypic analysis of natural killer cell populations from pSS patients.**

(A): Summarized proportions of circulating NK cell subsets defined in figure 1 including CD56<sup>dim</sup> CD16<sup>+</sup> (II) and CD56<sup>hi</sup> CD16<sup>-</sup> (IV) NK subsets in n= 56 healthy donors (HD; grey) and n= 42 total or n=17 HQ and n=25 No-HQ primary Sjögren´s syndrome (pSS; blue) patients.

(B-C): Proportions of cells expressing CD107a (B, C), and frequencies of total IFN $\gamma$ <sup>+</sup>, total TNF $\alpha$ <sup>+</sup>, IFN $\gamma$ <sup>+</sup> CD107a<sup>+</sup> (C) within the indicated circulating NK cell subsets from 16 HD (grey) and n= 19 total or HQ stratified (n=8 HQ, n=11 No-HQ) pSS patients (blue).

Data information: Data is represented as box and whiskers plots with maximum and minimum range and a median value central band. Data points are representing biological replicates. Statistical significance was calculated using a two-tailed Mann Whitney test.

\*p<0.05; \*\*p<0.01; \*\*\*p<0.001.

Appendix Figure S2

A

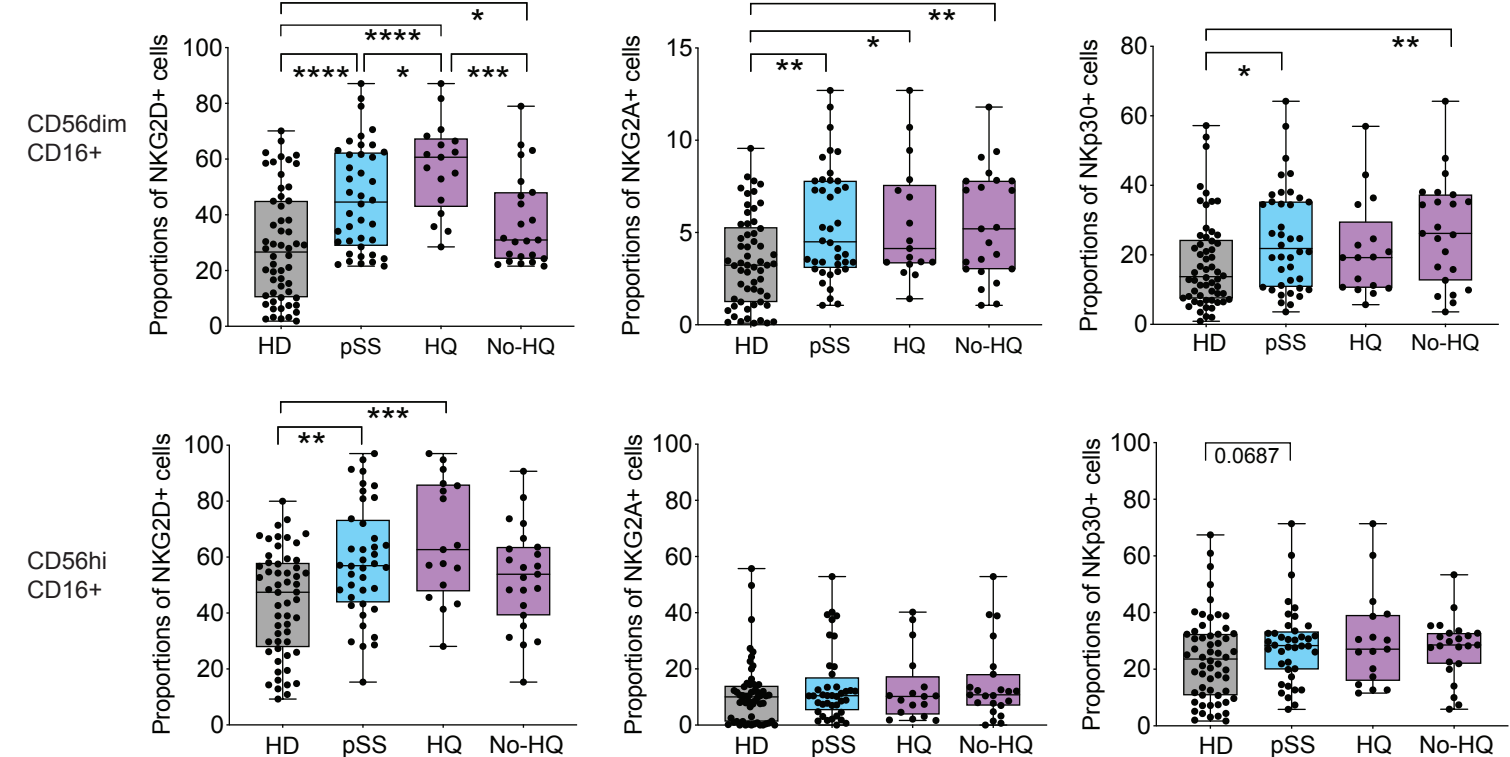

B

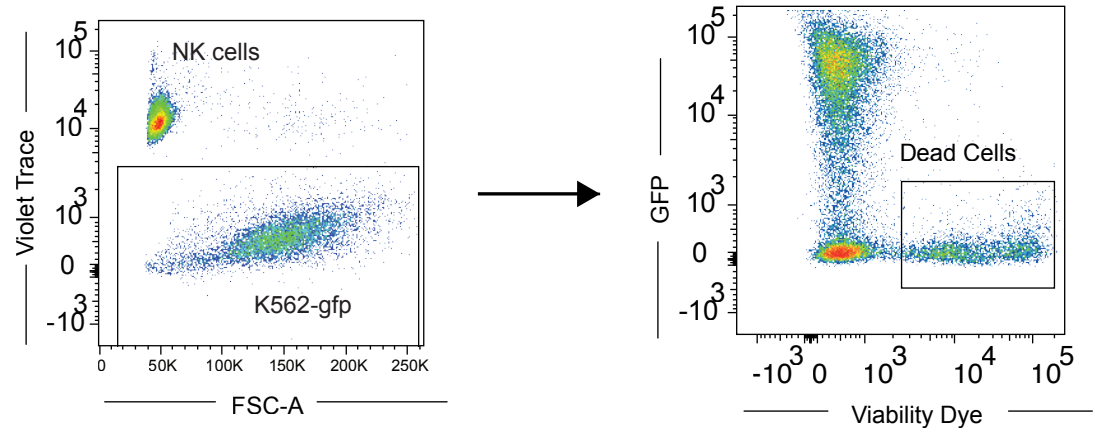

C

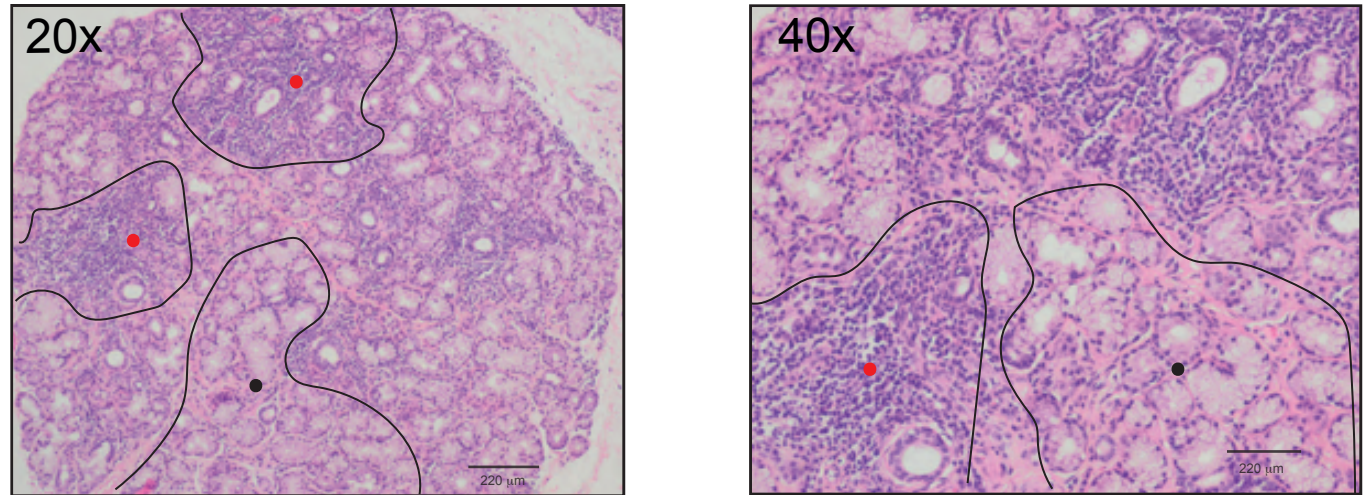

**Appendix Figure S2. Characterization of activating and inhibitory receptors and functional analysis of NK cells from pSS patients.**

(A): Proportions of NKG2D (left plot), NKG2A (middle plot) and NKp30 (right plot) receptors on the indicated NK cell subsets from primary Sjögren's syndrome (total n=40 pSS; blue; HQ n=17; No-HQ n=23 purple) and healthy donors (n= 56 HD; grey).

(B): Flow cytometry gating strategy representing frequencies of dead K562-GFP after culture in medium alone or in the presence of isolated NK cells. K562 cells were identified as Violet Trace negative cells to exclude NK cells. Dead K562 were quantified as cells losing GFP expression and acquiring staining of the viability dye marker.

(C): Eosin/hematoxylin tissue sections from SG tissue of a representative patient to different magnifications 20x (left) and 40x (right), showing low (black stars) and highly (red stars) infiltrated areas with altered morphology.

Data information (A): Data is represented as box and whiskers plots with maximum and minimum range and a median value central band. Data points represented biological replicates. Statistical significance was calculated using a two-tailed Mann Whitney test.

\*p<0.05; \*\*p<0.01; \*\*\*p<0.001; \*\*\*\*p<0.0001.

# Appendix Figure S3

A

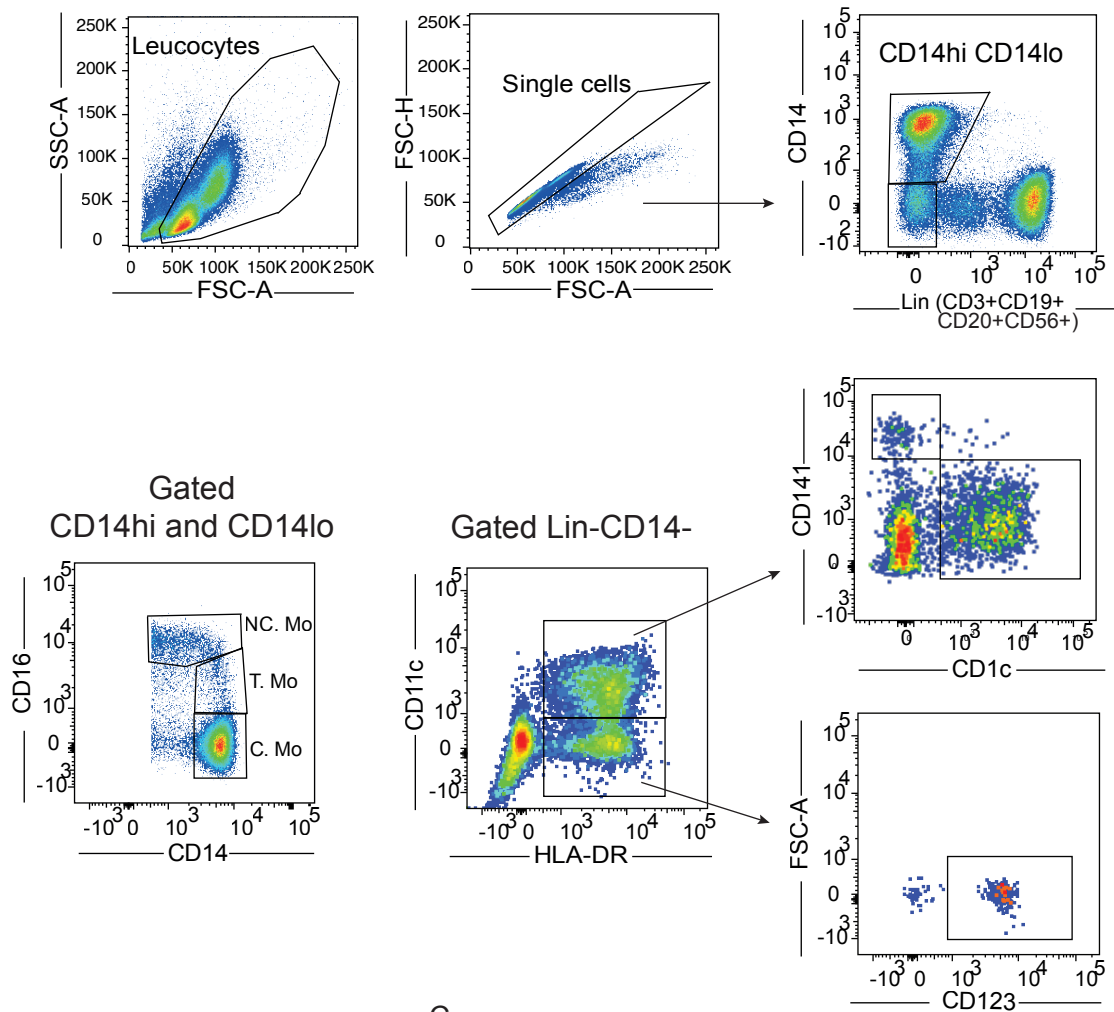

B

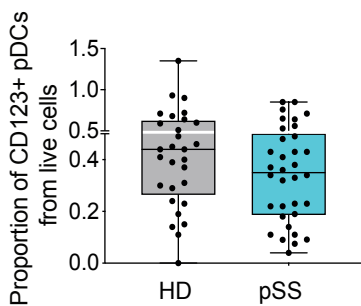

C

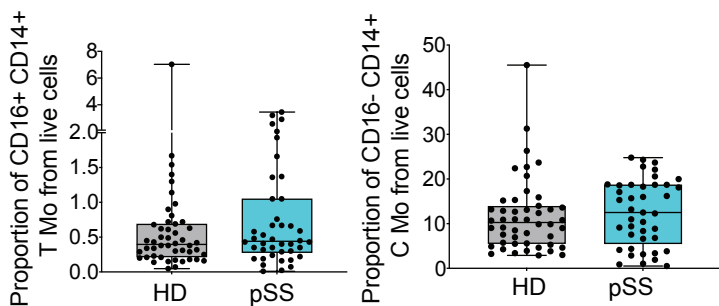

D

SMGL section from pSS

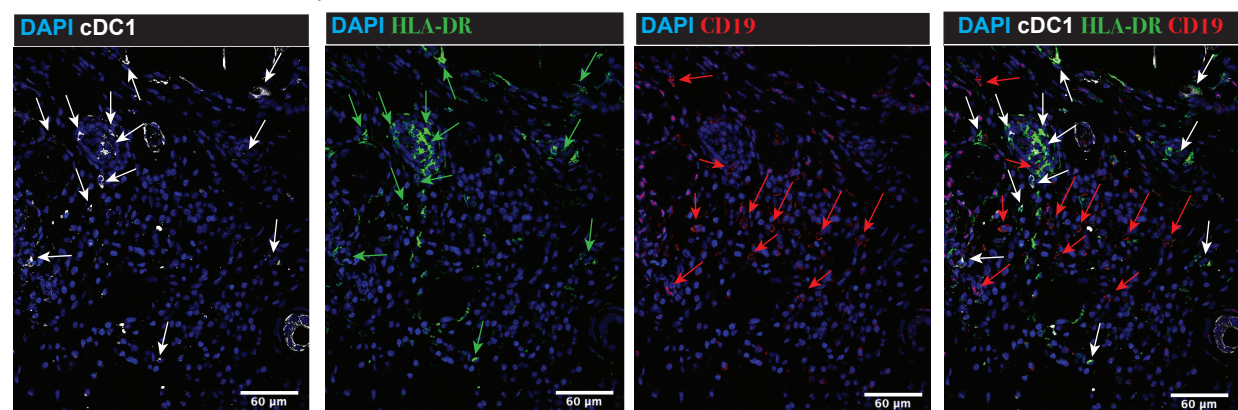

**Appendix Figure S3. Identification and frequencies of circulating myeloid subsets from pSS patients.**

(A): Flow cytometry gating strategy identifying CD14<sup>+</sup> Monocytes and HLA-DR<sup>+</sup> CD11c<sup>+</sup> conventional (cDC) subdivided into CD1c<sup>+</sup> cDC2 and CD141<sup>+</sup> cDC1 and CD11c<sup>-</sup> CD123<sup>+</sup> plasmacytoid (pDC) dendritic cells from Lineage (CD3, CD19, CD20, CD56) negative CD14<sup>-</sup> cells. CD14<sup>+</sup> Mo was further defined as CD14<sup>lo</sup> CD16<sup>hi</sup> non classical (NC), CD14<sup>+</sup> CD16<sup>+</sup> transitional (T) and CD14<sup>+</sup> CD16<sup>-</sup> classical (C) Mo on the basis of the expression of CD16.

(B-C): Box and whisker plots representing frequencies of Lin<sup>-</sup> HLA-DR<sup>+</sup> CD11c<sup>-</sup> CD123<sup>+</sup> pDCs (B), T Mo and C Mo subsets (C) in live mononuclear cells from PB from HD (grey, n=48) and total pSS patients (blue, n=44) obtained by flow cytometry.

(D): Representative confocal microscopy (40x magnification) showing immunofluorescence analysis of CD1c (white), HLADR (green) and CD19 (red) expression on a representative SG tissue section from a pSS patient. Cell nuclei were stained with DAPI (blue). cDC2 co-expressing CD1c and high levels of HLADR with dendritic cell morphology are highlighted with white arrows. CD19<sup>+</sup> cells expressing low levels of CD1c and HLA-DR are highlighted with red arrows. A 60µm Scale bar is included in each image.

Data information (B): Data is represented as box and whiskers plots with maximum and minimum range and a median value central band. Data points represented biological replicates.

# Appendix Figure S4

## A

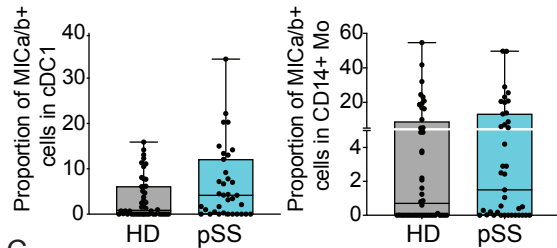

## B

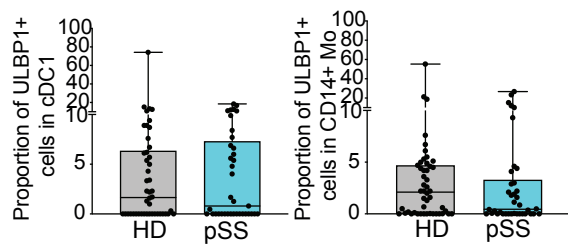

## C

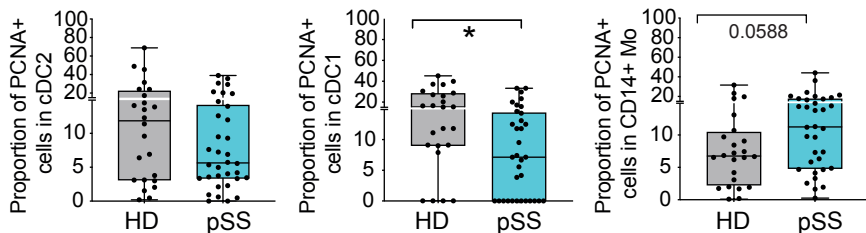

## D

HD salivary gland

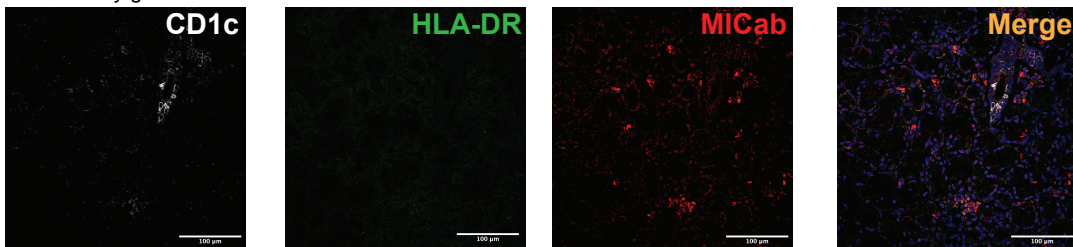

## E

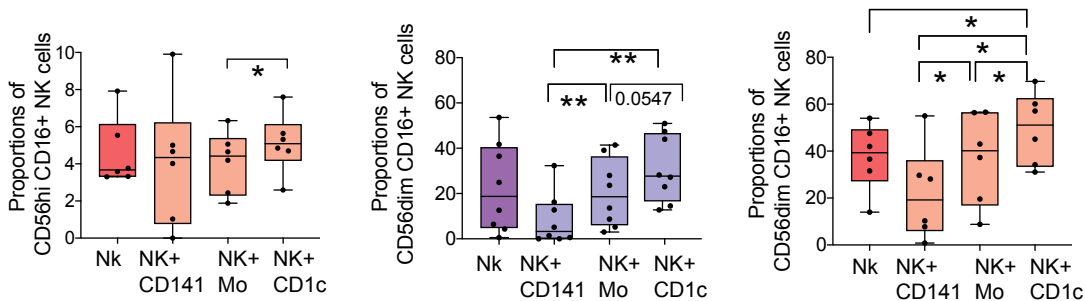

## F

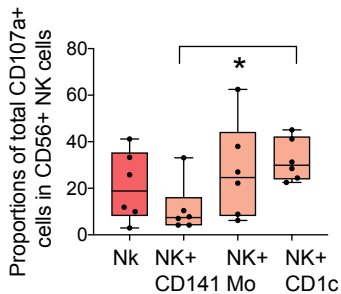

## G

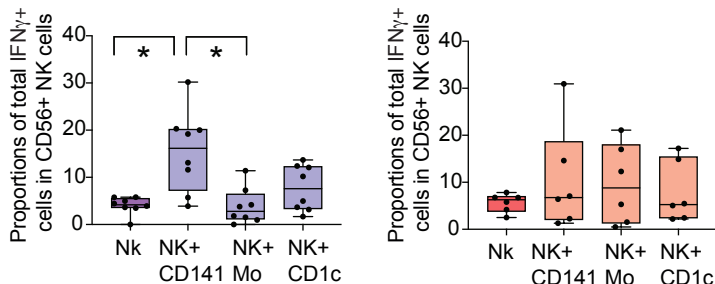



#### **Appendix Figure S4. Functional ability of cDC2, cDC1 and Mo to stimulate NK cells**

(A, B,C): Proportions of MICa/b<sup>+</sup> (A), ULBP1<sup>+</sup> (B) PCNA<sup>+</sup> (C) cells from circulating cDC1 and Mo in healthy donors (HD; grey n=46 A,B; n=24 C) and primary Sjögren's syndrome (pSS; blue; n=42 A,B; n=34 C) individuals. Levels of PCNA on cDC2 are also included.

(D): Representative confocal microscopy (40x magnification) showing immunofluorescence analysis of CD1c (white), HLADR (green) and MICab (red) expression on a representative control SG tissue section from a non-autoimmune mechanical sialadenitis patient from a total of n=3 individuals tested. Cell nuclei were stained with DAPI (blue).

(E): Proportions of the CD56<sup>hi</sup> CD16<sup>+</sup> (left) and CD56<sup>dim</sup> CD16<sup>+</sup> (middle and right) NK cell subsets from HD (orange) and CD56<sup>dim</sup> CD16<sup>+</sup> NK subset from pSS patients (purple), after 16h culture of sorted autologous CD56<sup>+</sup> NK cell in media alone or in the presence of sorted autologous circulating Mo, cDC2 and cDC1 from n=8 pSS patients and n=6 HD, at ratio 1:2 (myeloid cell:NK).

(F,G): Expression of CD107a from NK cells on HD (F; n=6 biological replicates) and proportions of IFN $\gamma$ <sup>+</sup> NK cells from pSS patients and HD (G; n=8 biological replicates) in these functional assays is shown. Statistical significance was calculated using two-tailed Wilcoxon matched pairs signed rank test (\*p<0.05; \*\*p<0.01).

Data information (A, B, C, E, F, G): Data is represented as box and whiskers plots with maximum and minimum range and a median value central band. Data points are represented by biological replicates. (C): Statistical significance was calculated using a two-tailed Mann Whitney test. \*p<0.05. (E,F,G): Statistical significance was calculated using two-tailed Wilcoxon matched pairs signed rank test (\*p<0.05; \*\*p<0.01).

Appendix Figure S5

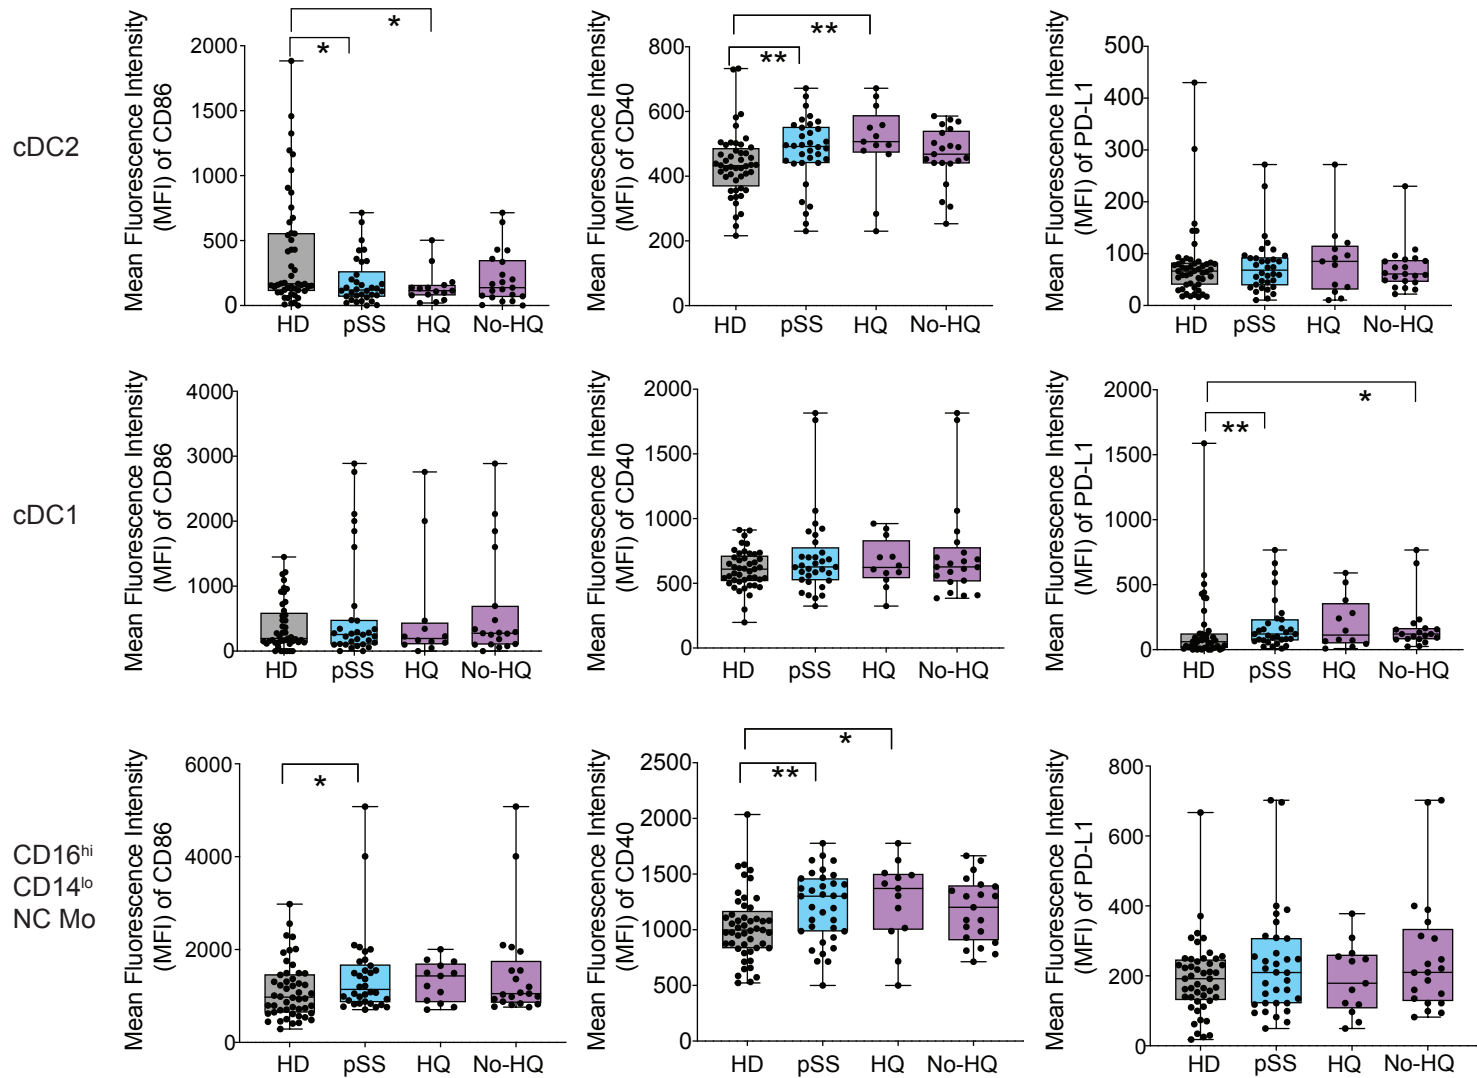

**Appendix Figure S5. Phenotypic characteristics of circulating myeloid subsets from pSS patients.**

(A-B): Mean Fluorescence Intensity (MFI) of expression of the indicated Interferon stimulated costimulatory molecules on circulating cDC1 and cDC2 and non-classical (NC) Mo from the blood of n=48 healthy donors (HD; grey) and n=34 total (blue) and n=13 HQ and n=21 No-HQ (purple) primary Sjögren's syndrome (pSS) individuals.

Data information: (A-Data is represented as box and whiskers plots with maximum and minimum range and a median value central band. Data points are represented by biological replicates. Statistical significance was calculated using a two-tailed Mann Whitney test. \*p<0.05; \*\*p<0.01.

# Appendix Figure S6

A

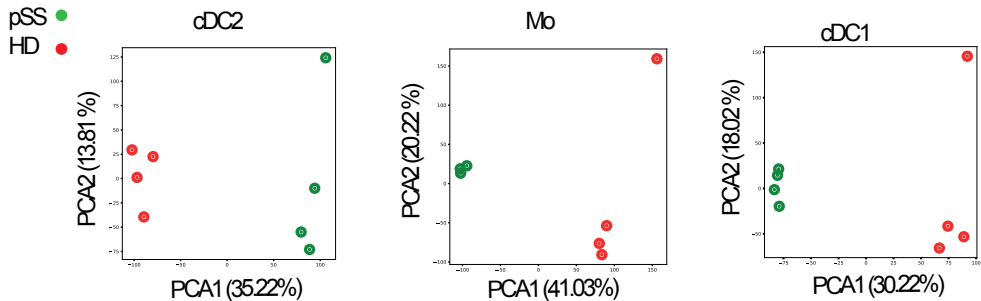

B

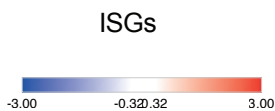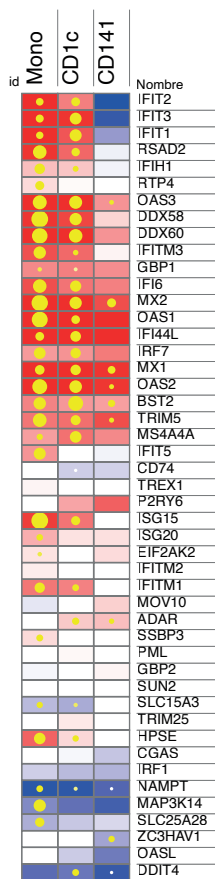

C

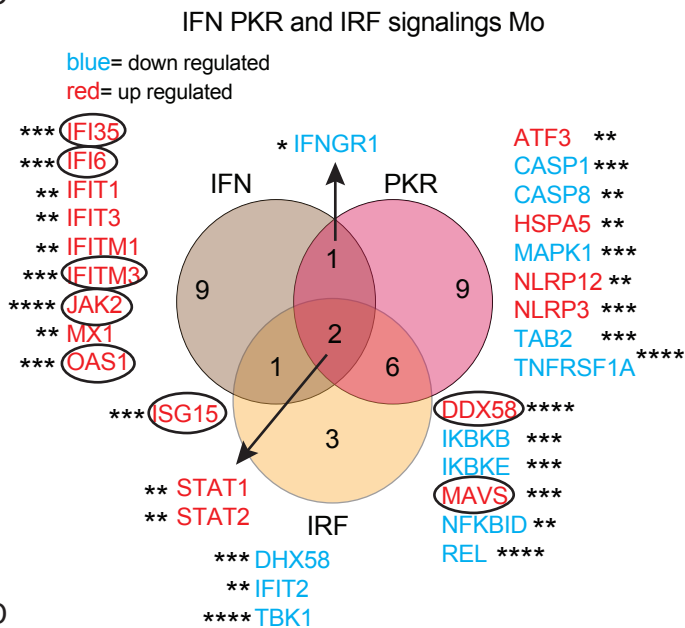

D

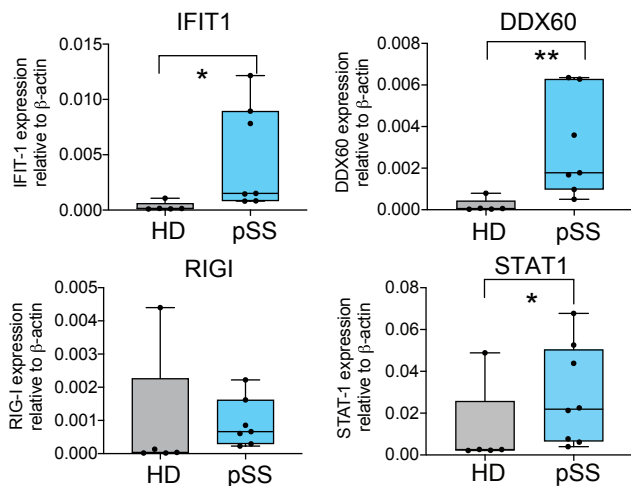

**Appendix Figure S6. Pathway analysis of differential transcriptional patterns of Mo and cDC subsets from the blood of pSS patients.**

(A): Principal Component Analysis (PCA) representing transcriptional profiles in cDC2, cDC1 and Mo from the blood of n=4 primary Sjögren's syndrome (pSS; green) and n=4 healthy donors (HD; red).

(B): Heatmap reflecting Log2FC in expression of 47 transcripts associated with IFN signaling or IFN Stimulated Genes (ISG) on Mo, cDC2 and cDC1 from the blood of 4 pSS patients compared to 4 HD. Highlighted Red show upregulated expression and blue, show downregulated pathways. Yellow dots size is proportional to statistical significance of DEG expression ( $p < 0.05$  FDR corrected values).

(C): Venn's diagram of overlapping significant DEG included in selected IFN, PKR and IRF canonical pathways in PB Mo from pSS individuals. Significant levels of differential expression are highlighted for each DEG. \* $p < 0.05$ ; \*\* $p < 0.01$ ; \*\*\* $p < 0.001$ ; \*\*\*\* $p < 0.0001$ .

(D): qPCR validation of the indicated transcript from sorted circulating Mo from n=7 pSS patients (blue) versus n=5 HD (grey) as biological replicates. Statistical significance was calculated using a two tailed U Mann Whitney test. \* $p < 0.05$ ; \*\* $p < 0.01$ .

Data information (D): Data is represented as box and whiskers plots with maximum and minimum range and a median value central band.

# Appendix Figure S7

A

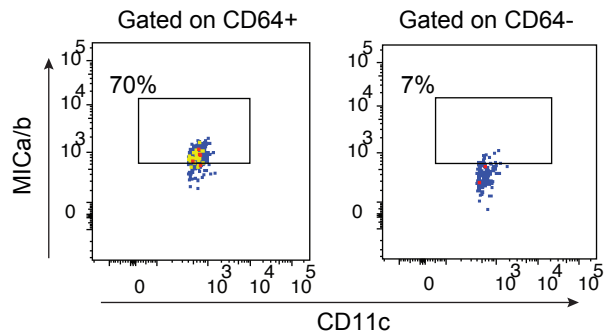

B

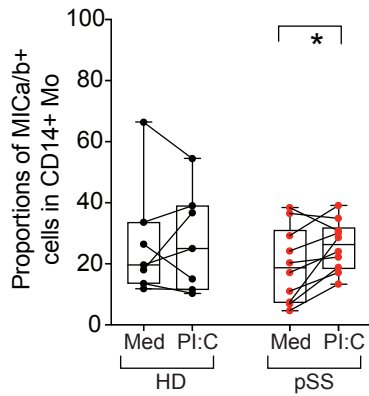

C

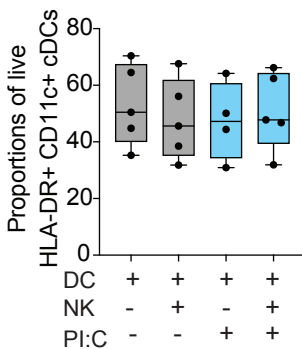

D

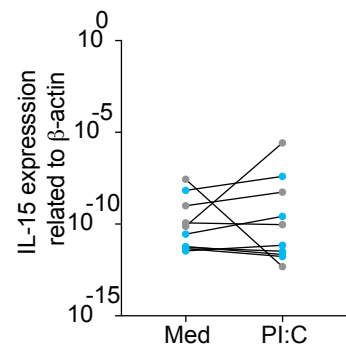

E

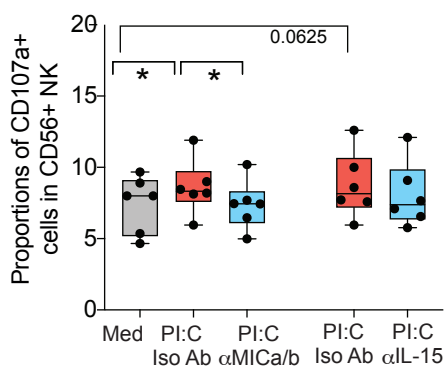

F

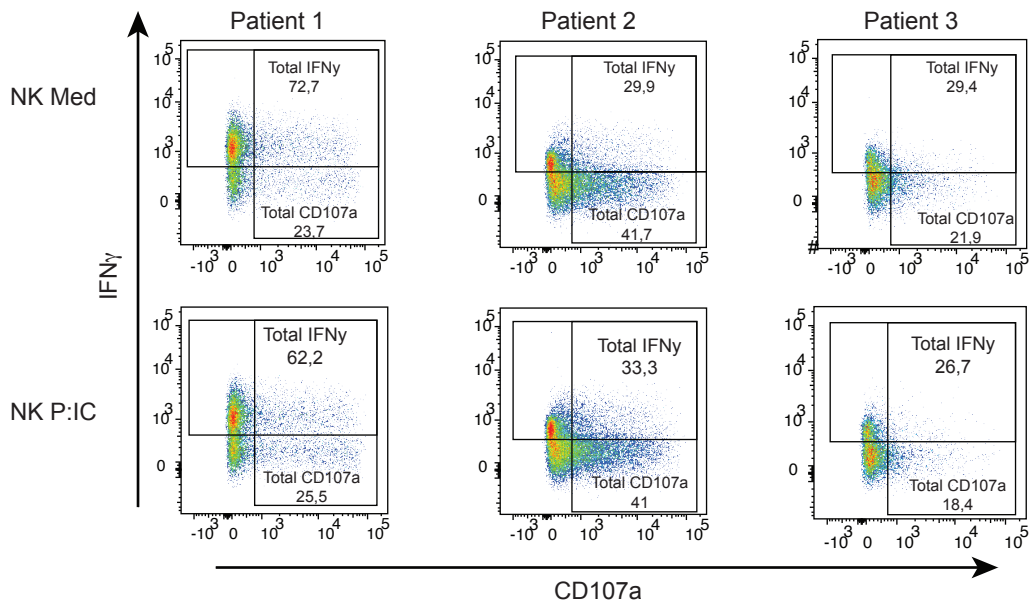

**Appendix Figure S7. MICa/b upregulation after poly I:C stimulation in myeloid cells from healthy and pSS individuals Sjögren patients. Impact in NK cell functional activation.**

(A): Representative flow cytometry dot plots showing levels of MICa/b versus CD11c expression on gated cDC2 defined by CD64<sup>+</sup> and CD64<sup>-</sup> expression. Percentages of positive MICa/b<sup>+</sup> cells are highlighted on top of each box.

(B): Proportions of cells expressing MICa/b in Mo from the blood of HD (black; n=7 biological replicates) or pSS individuals (red; n=9 biological replicates), after 16h of culture in the presence of poly I:C (PI:C) compared to cells cultured in media only (Med).

(C): Proportions of live CD11c<sup>+</sup> HLADR<sup>+</sup> cDC2 precultured in media or PI:C and co-cultured in the absence or the presence of autologous NK cells. Mortality was determined by FACS with a viability dye in different biological replicates.

(D): RT-qPCR analysis of IL-15 transcriptional levels relative to beta-actin in cDC2 from HD (grey; n=4) and pSS patients (blue; n=6) as biological replicates, cultured for 16h in Med or PI:C.

(E): Proportions of CD107a<sup>+</sup> NK cells in PBMC after culture for 16h in Med or with PI:C and in the absence or the presence of neutralizing antibodies against MICa/b, IL-15 or the corresponding isotypic controls.

(F): Flow cytometry analysis of IFN $\gamma$  versus CD107a expression on isolated NK cells from three representative healthy donors cultured for 16h in the presence of Med alone or PI:C. Proportions of total IFN $\gamma$ <sup>+</sup> and CD107a<sup>+</sup> cells are highlighted on the corresponding gates.

Data information (B, C, E): Data is represented as box and whiskers plots with maximum and minimum range and a median value central band. Statistical significance was calculated using two-tailed Wilcoxon matched pairs signed rank test (\*p<0.05).

# Appendix Figure S8

A

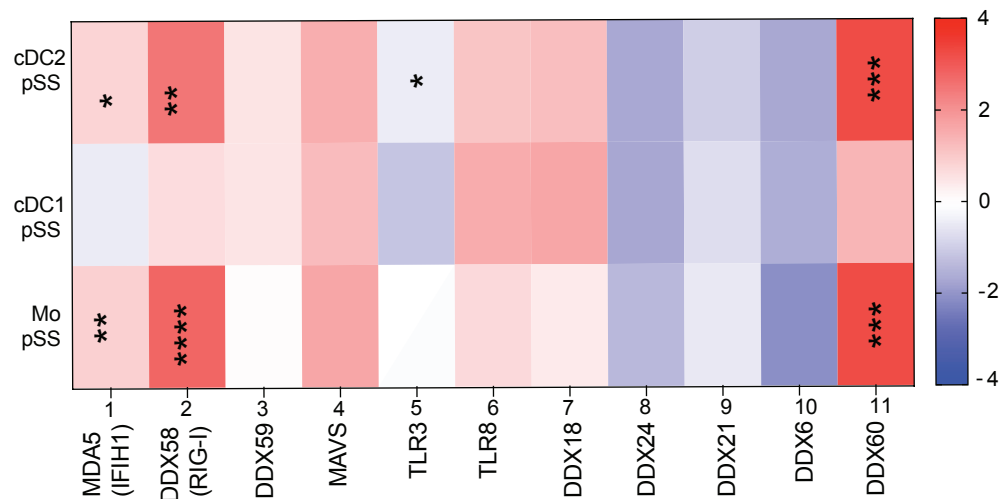

B

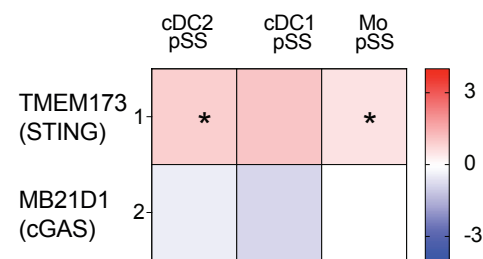

C

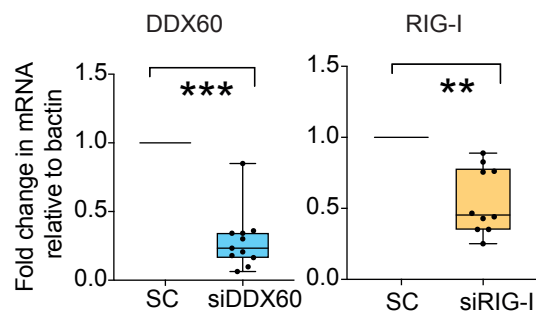

D

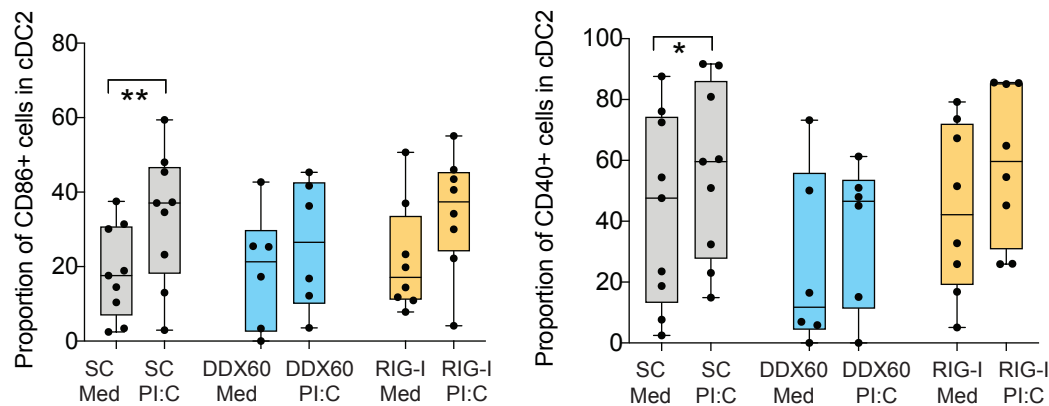

E

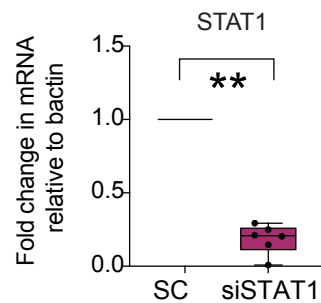

F

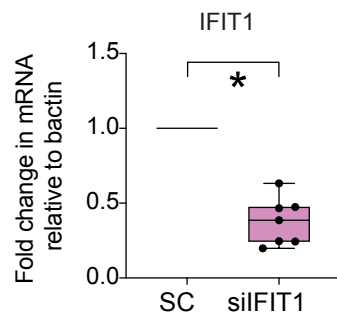

G

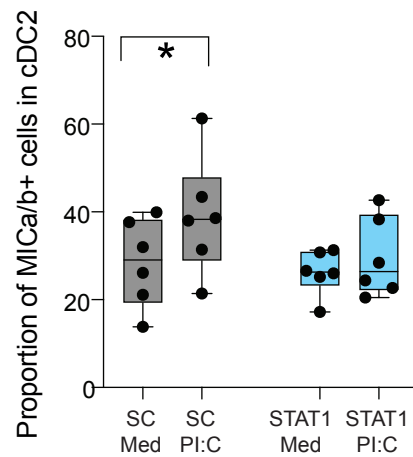



**Appendix Figure S8. Expression of innate sensors and si-RNA knock down of DDX60/RIG-I and STAT1 on cDC2.**

(A): Heatmap reflecting fold change in transcriptional expression of the indicated RNA helicases in cDC2, cDC1 and Mo from pSS compared to HD. Significant changes are highlighted. Red upregulated, blue downregulated.

(B): Heatmap reflecting log<sub>2</sub>FC in transcription of innate DNA sensors in cDC2 and cDC1 and in Mo of n=4 primary Sjögren's syndrome (pSS) and n=4 healthy donor (HD).

(C, E, F): Fold change in transcriptional levels of DDX60 (C; left), DDX58 (C; RIG-I, right), STAT1 (E) and IFIT1 (F) analyzed by RT-qPCR and normalized by endogenous β-Actin levels in cDC2 nucleofected with the corresponding siRNAs. RT-qPCR values were normalized to those in cells nucleofected with control scramble (SC) siRNAs. (D, G): Proportions of cells expressing CD86 (left), CD40 (right) (D) or MICa/b within cDC2 nucleofected with either SC-siRNA (biological replicates n=9 in D and n=6 in G) or DDX60 (biological replicates n=6) or DDX58 (biological replicates n=8) (D) or STAT1 (G) (biological replicates n=6)-specific siRNAs and cultured in the presence of Med or PI:C for 16h (D). In some experiments (n=6) the impact of siRNA specific for STAT1 was also studied (G).

Data information (C, D, E, G): Data is represented as box and whiskers plots with maximum and minimum range and a median value central band. Data points are represented by biological replicates. (A,B): Statistical significant differences in differential expression in indicated genes from heatmaps is highlighted. \*p<0.05; \*\*p<0.01; \*\*\*p<0.001; \*\*\*\*p<0.0001.(C,D,E,F,G): Statistical significance was calculated using a two-tailed Wilcoxon matched pairs test (\*p<0.05; \*\*p<0.01; \*\*\*p<0.001).

# Appendix Figure S9

A

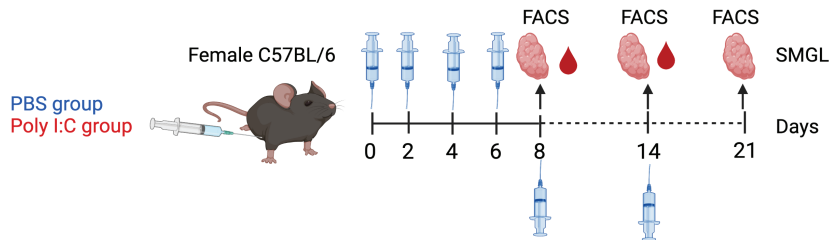

B

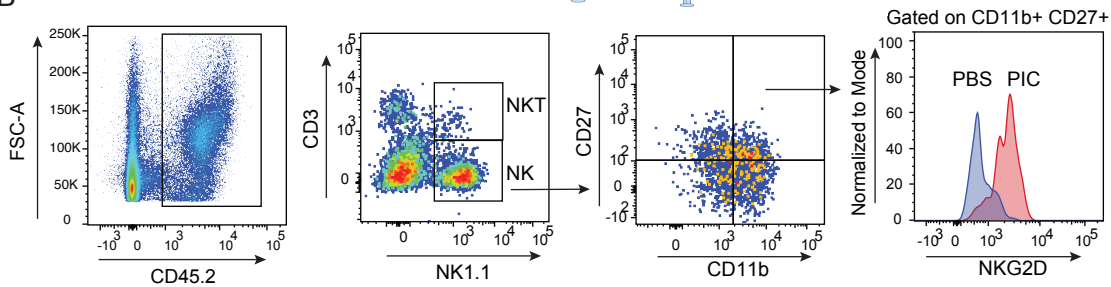

C

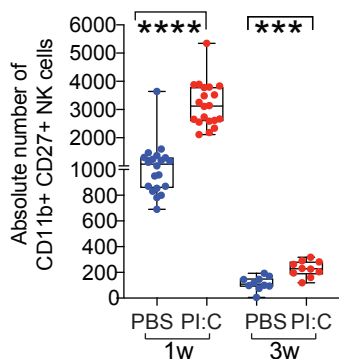

D

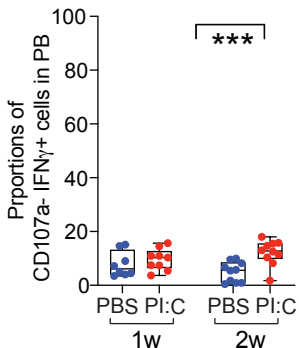

E

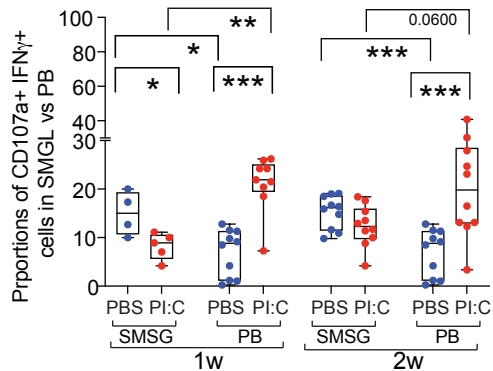

**Appendix Figure S9. *In vivo* analysis of NK cells after intraperitoneal injection of poly I:C in mice.**

(A): Schematic representation of the experimental design for the *in vivo* experiments where myeloid and NK cell subsets were studied in the submandibular salivary gland (SMSG) after the injection of mice with poly I:C (PI:C) or PBS.

(B): Representative flow cytometry gating strategy defining NK cell subsets in the SMSG and the expression of the indicated markers on these cells. Expression of NKG2D on gated NK cells is also shown.

(C): Absolute numbers of CD11b<sup>+</sup> CD27<sup>+</sup> cells present in the SMSG after 1 and 3 weeks post-injection with PBS (blue, biological replicates n=19 at week 1 and n=10 at week 3) and PI:C (n=19 and n=10 biological replicates at 1 and 3 weeks, respectively).

(D, E): Proportions of the CD107a<sup>-</sup> IFN $\gamma$ <sup>+</sup> (n=8; PBS, n=9; PI:C at 1 week; n=10 PBS and PI:C at week 2) in PB (D) and CD107a<sup>+</sup> IFN $\gamma$ <sup>+</sup> cells (E) on gated CD11b<sup>+</sup> CD27<sup>+</sup> NK cell subset present in the SMSG and PB (SMSG biological replicates: n=4, n=10 in PBS at week 1 and week2; n=5 and n=10 in PI:C at week 1 and week 2; PB biological replicates: n=10 for both week 1 and 2 in PBS, n=9 and n=10 in PI:C at week 1 and 2, respectively) of the indicated experimental groups at 1 and 2 weeks after treatment initiation.

Data information (C, D, E): Data is represented as box and whiskers plots with maximum and minimum range and a median value central band. Data points are represented by biological replicates. (C,D,E): Statistical significance was calculated with a two tailed Mann Whitney test. \*p<0.05; \*\*p<0.01; \*\*\*p<0.001; \*\*\*\*p<0.0001.

# Appendix Figure S10

**A**

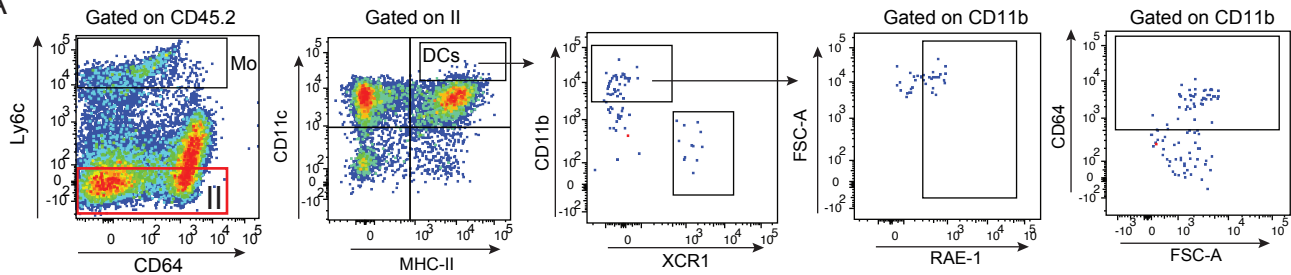

**B**

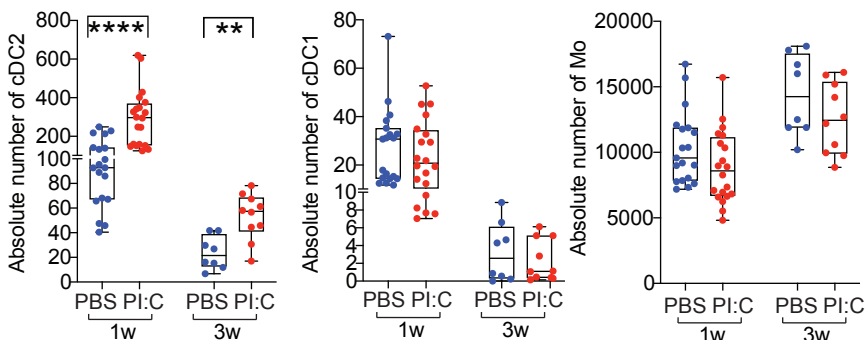

**C**

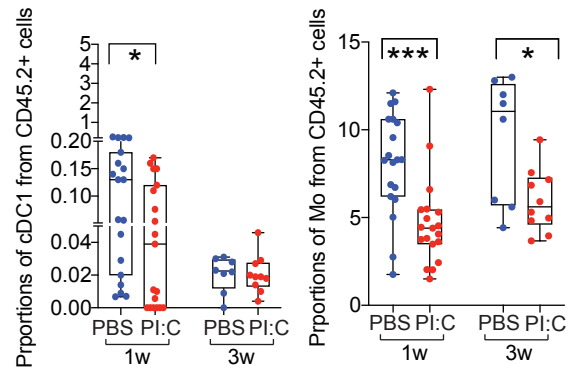

**D**

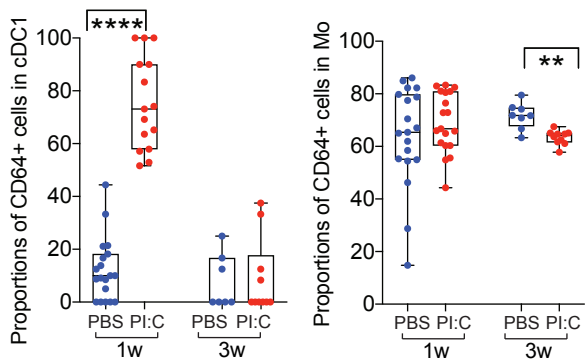

**E**

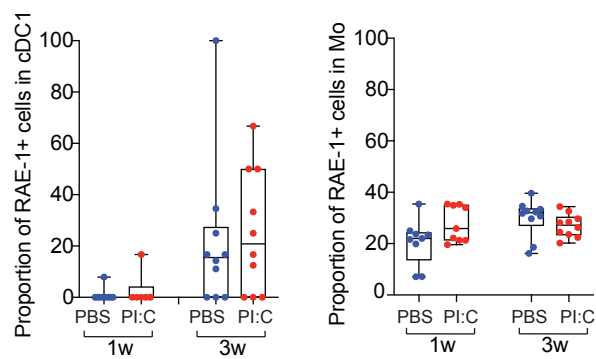

**Appendix Figure S10. *In vivo* analysis of cDC subsets and Mo after intraperitoneal injection of poly I:C in mice.**

(A): Representative flow cytometry gating strategy defining cDC1 and cDC2 subsets defined as CD11<sup>hi</sup> MHC-II<sup>+</sup> cells differing on expression of XCR1 and CD11b in the SMSG. Expression of CD64 and RAE-1 on gated cDC2 is also shown.

(B-C): Absolute numbers (B) and frequencies (C) of XCR1<sup>+</sup> CD11c<sup>hi</sup> cDC1 and Ly6<sup>+</sup> Mo in the SMSG of mice injected with PBS (blue) or PI:C (red) at 1 and 3 weeks after treatment initiation. Absolute numbers of cDC2 are also included. Biological replicates n=19 PBS and PI:C in B, C at 1 week and n=8 in PBS and n=10 PI:C at 3 weeks in B,C.

(D-E): Proportions of CD64<sup>+</sup> (n= 19 PBS and PI:C in Mo and cDC1; n=16 PI:C cDC1 at 1 week; n=8 PBS and n=10 PI:C in both subsets at 3 weeks) (D) and RAE-I<sup>+</sup> (n=9 PBS, n=6 PI:C cDC1; n=9 PBS, PI:C Mo at 1 week; n=10 PBS, PI:C in cDC1 and Mo at 3 weeks) (E) cells included in XCR1<sup>+</sup> cDC1 and Ly6C<sup>+</sup> Mo in the SMSG from the two mice groups at the indicated timepoints are also shown.

Data information (B, C, D, E): Data is represented as box and whiskers plots with maximum and minimum range and a median value central band. Data points are represented by biological replicates. Statistical significance was calculated with a two tailed Mann Whitney test. \*p<0.05; \*\*p<0.01; \*\*\*p<0.001; \*\*\*\*p<0.0001.

|                                             | HD         | pSS              | pSS HQ           | pSS Non-HQ       | OT               | <i>p-value</i> HQ vs non-HQ | <i>p-value</i> HQ vs OT |
|---------------------------------------------|------------|------------------|------------------|------------------|------------------|-----------------------------|-------------------------|
| <b>Number of patients (n)</b>               | <b>56</b>  | <b>48</b>        | <b>17</b>        | <b>25</b>        | <b>6</b>         |                             |                         |
| Mean Age ( <i>years, Min-Max</i> )          | 59 (25-75) | 60 (23-88)       | 66 (44-88)       | 64 (23-87)       | 64 (42-70)       | 0.3667                      | 0.2468                  |
| Sex (% Female)                              | 100%       | 98%              | 100%             | 97%              | 100%             | 0.0810                      | n.d                     |
| <b>Severity n (%)</b>                       |            |                  |                  |                  |                  |                             |                         |
| Mild                                        | n.d        | 31 (64%)         | 11 (64%)         | 21 (84%)         | 0                | 0.0013**                    | <0.0001****             |
| Severe                                      | n.d        | 10 (21%)         | 6 (35%)          | 4 (16%)          | 6 (100%)         | 0.002**                     | <0.0001****             |
| HQ treatment                                |            | 17 (35%)         | 17 (100%)        | 0                | 0                | <0.0001****                 | <0.0001****             |
| <b>Extra-glandular manifestations n (%)</b> | n.d        |                  |                  |                  |                  |                             |                         |
| Any extra-glandular manifestations          |            | 27 (56%)         | 13 (76%)         | 8 (32%)          | 6 (100%)         | <0.0001****                 | <0.0001****             |
| Arthritis                                   |            | 16 (33%)         | 7 (41%)          | 6 (24%)          | 3 (50%)          | 0.0377*                     | 0.063                   |
| Raynaud                                     |            | 4 (8.3%)         | 3 (18%)          | 1 (4%)           | 0                | 0.0016**                    | <0.0001****             |
| Oral ulcers                                 |            | 1 (2.1%)         | 0                | 0                | 1 (16.6%)        | n.d                         | <0.0001****             |
| Vasculitis process                          |            | 2 (4.2%)         | 1 (5.8%)         | 0                | 0                | 0.0129*                     | 0.0129                  |
| Polyneuropathy                              |            | 1 (2.1%)         | 0                | 0                | 1 (16.6%)        | n.d                         | <0.0001****             |
| Pulmonary involvement                       |            | 1 (2.1%)         | 0                | 0                | 1 (16.6%)        | n.d                         | <0.0001****             |
| Kidney disease                              |            | 1 (2.1%)         | 0                | 1 (3.2%)         | 0                | 0.0810                      | n.d                     |
| Lymphoma                                    |            | 2 (4.2%)         | 2 (11.8%)        | 0                | 0                | 0.0004***                   | 0.0004***               |
| <b>Laboratory values</b>                    |            |                  |                  |                  |                  |                             |                         |
| <b>Median (Min-Max)</b>                     | n.d        |                  |                  |                  |                  |                             |                         |
| RF (UI/ml)                                  |            | 24 (8-209)       | 20 (8-209)       | 18 (10-104)      | 13 (10-30)       | 0.3051                      | 0.1359                  |
| ESR                                         |            | 27 (3-79)        | 29 (6-59)        | 31 (3-79)        | 17 (4-28)        | 0.7710                      | 0.0455*                 |
| CRP (mg/dl)                                 |            | 0.16 (0.03-1.7)  | 0.16 (0.03-0.69) | 0.18 (0-1.7)     | 0.1 (0.03-0,25)  | 0.5107                      | 0.2931                  |
| Lymphocyte (Count/mm <sup>3</sup> )         |            | 1545 (490-5190)  | 1390 (900-2480)  | 1565 (490-5190)  | 2070 (4400-9970) | 0.1769                      | 0.0023**                |
| Gammaglobulin (g/l)                         |            | 1.43 (0.41-2.79) | 1.5 (0.41-2.79)  | 1.43 (1.05-2.68) | 1.3 (0.8-1.9)    | 0.914                       | 0.4826                  |
| IgG (mg/dl)                                 |            | 1680 (591-3430)  | 1930 (591-3430)  | 1555 (1060-2700) | 1150 (877-2260)  | 0.2666                      | 0.3097                  |
| C3 (mg/dl)                                  |            | 105 (78.9-165)   | 95.4 (80.7-124)  | 108 (57-165)     | 101 (81-145)     | 0.0306*                     | 0.3075                  |
| C4 (mg/dl)                                  |            | 20 (11-29)       | 19.2 (13.4-33.6) | 19.3 (9.1-30.6)  | 23 (18-29)       | 0.4511                      | 0.3631                  |

**Appendix Table S1. Clinical characteristics of Sjögren´s syndrome patients**

Abbreviations: HQ: Hydroxychloroquine; OT: other treatments (GC: glucocorticoids; MTX: methotrexate; B.T: biological therapy); RF: rheumatoid factor; ESR: erythrocyte sedimentation rate; CRP: C-reactive protein; IgG: immunoglobulin type G; C3: fraction 3 of complement; C4: fraction 4 of complement; n: number; n.d.= no date.

|                                                                           | HD            | pSS           | HQ pSS        | Non-HQ pSS    | p-value (HD vs pSS) | p-value (HD vs HQ pSS) | p-value (HD vs non-HQ pSS) | p-value (HQ vs non-HQ pSS) |
|---------------------------------------------------------------------------|---------------|---------------|---------------|---------------|---------------------|------------------------|----------------------------|----------------------------|
| <i>Median proportions of CD56- CD16+ (min-max)</i>                        | 5.5 (1.3-25)  | 5.8 (1.2-35)  | 4.2 (1.2-19)  | 6.5 (2.4-35)  | 0.3654              | 0.9456                 | 0.1733                     | 0.2228                     |
| <i>Median of CD107a on CD56- CD16+ (min-max)</i>                          | 12.2 (1.8-54) | 22.4 (7-53)   | 28.6 (7-53)   | 19.4 (10-52)  | 0.0479*             | 0.1531                 | 0.0797                     | 0.9039                     |
| <i>Median of IFN<math>\gamma</math> on CD56- CD16+ (min-max)</i>          | 9 (2.5-25)    | 15 (6-48)     | 14.3 (6-41)   | 15.5 (6-48)   | 0.0171*             | 0.0191*                | 0.1123                     | 0.8404                     |
| <i>Median of CD107a+ IFN<math>\gamma</math>+ on CD56- CD16+ (min-max)</i> | 1.5 (0-6.7)   | 3.3 (0-12)    | 3.2 (0-12)    | 3.5 (0.8-11)  | 0.085               | 0.5488                 | 0.0417*                    | 0.4778                     |
| <i>Median of TNF<math>\alpha</math> on CD56- CD16+ (min-max)</i>          | 9.6 (1-50)    | 5.6 (0-74)    | 5.7 (0.2-74)  | 4.3 (0-58)    | 0.7074              | 0.955                  | 0.5528                     | 0.7242                     |
| <i>Median of NKG2D on CD56- CD16+ (min-max)</i>                           | 25.5 (1.3-68) | 47 (16-82)    | 53 (26-82)    | 34 (16-75)    | 0.0007***           | <0.0001****            | 0.0995                     | 0.0034**                   |
| <i>Median of NKG2A on CD56- CD16+ (min-max)</i>                           | 2 (0-12)      | 3.3 (0.4-15)  | 2.9 (0.4-15)  | 3.45 (0.4-12) | 0.0381*             | 0.0970                 | 0.1054                     | 0.8764                     |
| <i>Median of NKp30 on CD56- CD16+ (min-max)</i>                           | 16.2 (1.5-58) | 17.5 (2.7-55) | 12.7 (3-50)   | 22.8 (2.7-55) | 0.8032              | 0.1666                 | 0.1395                     | 0.0486*                    |
| <i>Median of NKG2D on CD56hi CD16- (min-max)</i>                          | 40 (2.7-86)   | 49 (15-92)    | 59 (15-92)    | 46 (22-76)    | 0.0305*             | 0.0133*                | 0.2719                     | 0.0913                     |
| <i>Median of NKG2A on CD56hi CD16- (min-max)</i>                          | 11.5 (0-42)   | 14.5 (0.8-40) | 13.6 (1.4-40) | 16 (0.8-38)   | 0.1133              | 0.2835                 | 0.1623                     | 0.7712                     |
| <i>Median of NKp30 on CD56hi CD16- (min-max)</i>                          | 14 (0-56)     | 19 (3-44)     | 20,3 (3-44)   | 16,5 (5.3-30) | 0.0392*             | 0.0706                 | 0.1384                     | 0.4603                     |

**Appendix Table S2. Phenotype of different NK cell populations related with HQ (hydroxychloroquine) treatment in pSS patients.**

Statistical significance was calculated using a two tailed U Mann Whitney test. \*p<0.05; \*\*p<0.01; \*\*\*p<0.001; \*\*\*\*p<0.0001.



|                                                    | HD                | pSS               | HQ pSS            | Non-HQ pSS        | p-value (HD vs pSS) | p-value (HD vs HQ pSS) | p-value (HD vs non-HQ pSS) | p-value (HQ vs non-HQ pSS) |
|----------------------------------------------------|-------------------|-------------------|-------------------|-------------------|---------------------|------------------------|----------------------------|----------------------------|
| <i>Median proportions of CD123+ pDCs (min-max)</i> | 0.44 (0-1.3)      | 0.36 (0-0.9)      | 0.23 (0-0.9)      | 0.3225 (0.1-0.9)  | 0.2413              | 0.1108                 | 0.66                       | 0.3352                     |
| <i>Median MFI of CD86 on pDCs (min-max)</i>        | 147 (10-391)      | 245 (5-4080)      | 306 (33-4080)     | 166 (5-1513)      | 0.0451*             | 0.0221*                | 0.2506                     | 0.5305                     |
| <i>Median MFI of PDL-1 on pDCs (min-max)</i>       | 12 (0.4-84)       | 20.6 (0.2-91)     | 8.2 (0.8-48)      | 27.4 (0.2-91)     | 0.044*              | 0.9779                 | 0.0033**                   | 0.0345*                    |
| <i>Median MFI of CD40 on pDCs (min-max)</i>        | 389 (151-558)     | 457 (149-724)     | 471 (149-724)     | 409 (268-724)     | 0.1798              | 0.5556                 | 0.1387                     | 0.4952                     |
| <i>Median MFI of CD64 on pDCs (min-max)</i>        | 66 (12-574)       | 200 (62-685)      | 246,5 (63-516)    | 200 (62-685)      | <0.0001****         | 0.001**                | 0.0004****                 | 0.9670                     |
| <i>Median proportions of T Mo (min-max)</i>        | 0.4 (0-7)         | 0.4 (0-3.5)       | 0.4 (0.1-3.5)     | 0.5 (0-3)         | 0.4783              | 0.5624                 | 0.5711                     | 0.9930                     |
| <i>Median MFI of CD86 on T Mo (min-max)</i>        | 809 (135-3371)    | 827 (398-4270)    | 689 (477-1721)    | 873 (398-4270)    | 0.7436              | 0.7040                 | 0.4132                     | 0.2882                     |
| <i>Median MFI of PDL-1 on T Mo (min-max)</i>       | 301 (70-1303)     | 320 (123-1453)    | 266 (123-639)     | 388 (141-1453)    | 0.1597              | 0.4891                 | 0.0105*                    | 0.0260*                    |
| <i>Median MFI of CD40 on T Mo (min-max)</i>        | 1059 (430-2275)   | 1309 (485-2077)   | 1264 (485-2077)   | 1309 (541-2018)   | 0.0414*             | 0.1681                 | 0.0721                     | 0.9272                     |
| <i>Median MFI of CD64 on T Mo (min-max)</i>        | 2919 (337-7791)   | 3929 (1136-9061)  | 4418 (1136-9061)  | 3409 (1298-7010)  | 0.0177*             | 0.0537                 | 0.0661                     | 0.9165                     |
| <i>Median proportions of C Mo (min-max)</i>        | 10,3 (3-46)       | 11,6 (0.8-24)     | 15,7 (0.8-23)     | 8,9 (1.1-24)      | 0.6347              | 0.1345                 | 0.6576                     | 0.1925                     |
| <i>Median MFI of CD86 on C Mo (min-max)</i>        | 376 (17-1976)     | 383 (0-3066)      | 363 (0-783)       | 452 (40-3066)     | 0.6435              | 0.5352                 | 0.8612                     | 0.7532                     |
| <i>Median MFI of PDL-1 on C Mo (min-max)</i>       | 423 (96-1124)     | 524 (134-1612)    | 417 (134-754)     | 617 (217-1612)    | 0.2731              | 0.6539                 | 0.0623                     | 0.0840                     |
| <i>Median MFI of CD40 on C Mo (min-max)</i>        | 770 (208-1285)    | 793 (288-1557)    | 802 (288-1557)    | 793 (306-1075)    | 0.5741              | 0.5476                 | 0.7482                     | 0.9141                     |
| <i>Median MFI of CD64 on C Mo (min-max)</i>        | 6835 (1146-19059) | 8213 (1712-12940) | 8644 (1712-12940) | 7836 (2398-12235) | 0.073               | 0.2159                 | 0.1216                     | 0.7006                     |

**Appendix Table S3. Proportion of different myeloid cell populations related with HQ (hydroxychloroquine) treatment in pSS patients.**

Abbreviations: T Mo: Transitional Monocytes; C Mo: Classical Monocytes; MFI: Mean Fluorescence Intensity. Statistical significance was calculated using a two tailed U Mann Whitney test. \*p<0.05; \*\*p<0.01; \*\*\*p<0.001; \*\*\*\*p<0.0001.

**Appendix table S4: DEGs on cDC2, cDC1 and Mo (Log2 FC cutoff upregulated >1.5; downregulated <-1.5)**

**DEG CD1c+ cDCs pSS versus HD**

| Transcript ID   | Gene name | Log2(FC)   | FDR < 0.05 |
|-----------------|-----------|------------|------------|
| ENSG00000137959 | IFI44L    | 4.16535789 | 0.00167388 |
| ENSG00000111335 | OAS2      | 4.15678392 | 0.00068553 |
| ENSG00000182578 | CSF1R     | 3.93436922 | 0.00186519 |
| ENSG00000168329 | CX3CR1    | 3.83812944 | 0.01267943 |
| ENSG00000177409 | SAMD9L    | 3.76415944 | 0.00072853 |
| ENSG00000157601 | MX1       | 3.7111664  | 0.00190217 |
| ENSG00000089127 | OAS1      | 3.52032768 | 0.00433679 |
| ENSG00000111913 | RIPOR2    | 3.51241416 | 0.0040364  |
| ENSG00000121807 | CCR2      | 3.51168175 | 0.02587417 |
| ENSG00000132530 | XAF1      | 3.48286431 | 0.00089939 |
| ENSG00000101347 | SAMHD1    | 3.45232655 | 0.00847993 |
| ENSG00000249437 | NAIP      | 3.42167956 | 0.04887038 |
| ENSG00000111331 | OAS3      | 3.41018922 | 0.00057232 |
| ENSG00000133706 | LARS      | 3.38958469 | 0.0026949  |
| ENSG00000183486 | MX2       | 3.32443198 | 0.00080111 |
| ENSG00000140749 | IGSF6     | 3.31354682 | 0.0026949  |
| ENSG00000137628 | DDX60     | 3.2680394  | 0.00045076 |
| ENSG00000110876 | SELPLG    | 3.24737994 | 0.00155933 |
| ENSG00000139970 | RTN1      | 3.22749388 | 0.00272842 |
| ENSG00000092964 | DPYSL2    | 3.14283953 | 0.00253643 |
| ENSG00000163683 | SMIM14    | 3.14167309 | 0.00668554 |
| ENSG00000170581 | STAT2     | 3.13212829 | 0.00080302 |
| ENSG00000005020 | SKAP2     | 3.1231954  | 0.00186707 |
| ENSG00000088827 | SIGLEC1   | 3.04532683 | 0.01503232 |
| ENSG00000138449 | SLC40A1   | 2.95156286 | 0.00108396 |
| ENSG00000088986 | DYNLL1    | 2.93772619 | 0.00233277 |
| ENSG00000158488 | CD1E      | 2.89042691 | 0.00562529 |
| ENSG00000110077 | MS4A6A    | 2.86675942 | 0.01645689 |
| ENSG00000082074 | FYB1      | 2.8576699  | 0.00513019 |
| ENSG00000133835 | HSD17B4   | 2.82579063 | 0.00365669 |
| ENSG00000240065 | PSMB9     | 2.81532891 | 0.00096838 |
| ENSG00000119917 | IFIT3     | 2.81308894 | 0.00098988 |
| ENSG00000117676 | RPS6KA1   | 2.79970312 | 0.00089939 |
| ENSG00000178927 | C17orf62  | 2.79591345 | 0.00088661 |
| ENSG00000038427 | VCAN      | 2.76743251 | 0.00536505 |
| ENSG00000167220 | HDHD2     | 2.74889964 | 0.00261709 |

|                 |          |            |            |
|-----------------|----------|------------|------------|
| ENSG00000006715 | VPS41    | 2.73934221 | 0.00068553 |
| ENSG00000107551 | RASSF4   | 2.73092693 | 0.00329946 |
| ENSG00000093072 | ADA2     | 2.72385816 | 0.00251682 |
| ENSG00000165168 | CYBB     | 2.70586786 | 0.00264376 |
| ENSG00000181381 | DDX60L   | 2.69717824 | 0.00052149 |
| ENSG00000148110 | MFSD14B  | 2.63197719 | 0.00520463 |
| ENSG00000196975 | ANXA4    | 2.61333737 | 0.00077204 |
| ENSG00000197713 | RPE      | 2.60713676 | 0.01153698 |
| ENSG00000179639 | FCER1A   | 2.59644663 | 0.00882281 |
| ENSG00000175567 | UCP2     | 2.59370025 | 0.00563712 |
| ENSG00000197043 | ANXA6    | 2.58953409 | 0.00467602 |
| ENSG00000135218 | CD36     | 2.58500504 | 0.00349422 |
| ENSG00000134326 | CMPK2    | 2.56634923 | 0.00203231 |
| ENSG00000133574 | GIMAP4   | 2.5651703  | 0.02150282 |
| ENSG00000110031 | LPXN     | 2.55736628 | 0.00563329 |
| ENSG00000188641 | DPYD     | 2.53918064 | 0.00935057 |
| ENSG00000169385 | RNASE2   | 2.53792206 | 0.00498953 |
| ENSG00000196209 | SIRPB2   | 2.52111187 | 0.01585679 |
| ENSG00000107201 | DDX58    | 2.51544972 | 0.00080302 |
| ENSG00000105281 | SLC1A5   | 2.49745673 | 0.00099236 |
| ENSG00000133943 | DGLUCY   | 2.49512886 | 0.00155927 |
| ENSG00000035403 | VCL      | 2.47427384 | 0.0012446  |
| ENSG00000170915 | PAQR8    | 2.4699681  | 0.00200912 |
| ENSG00000197142 | ACSL5    | 2.46991698 | 0.00362829 |
| ENSG00000161929 | SCIMP    | 2.45193688 | 0.00709936 |
| ENSG00000105483 | CARD8    | 2.43912494 | 0.00089939 |
| ENSG00000154930 | ACSS1    | 2.43622234 | 0.00230358 |
| ENSG00000138119 | MYOF     | 2.4320701  | 0.0040802  |
| ENSG00000165795 | NDRG2    | 2.40671028 | 0.00744894 |
| ENSG00000177575 | CD163    | 2.39869809 | 0.00650305 |
| ENSG00000146192 | FGD2     | 2.39240703 | 0.00246913 |
| ENSG00000075303 | SLC25A40 | 2.39230879 | 0.00230358 |
| ENSG00000050344 | NFE2L3   | 2.39130111 | 0.00292999 |
| ENSG00000163220 | S100A9   | 2.38949301 | 0.02885702 |
| ENSG00000165672 | PRDX3    | 2.38019003 | 0.00142465 |
| ENSG00000121281 | ADCY7    | 2.37163873 | 0.00167388 |
| ENSG00000136631 | VPS45    | 2.37092946 | 0.00286187 |
| ENSG00000188554 | NBR1     | 2.36778573 | 0.0012446  |
| ENSG00000134986 | NREP     | 2.35723992 | 0.00237378 |
| ENSG00000106785 | TRIM14   | 2.3368806  | 0.00576925 |
| ENSG00000084733 | RAB10    | 2.32913481 | 0.00108396 |
| ENSG00000184432 | COPB2    | 2.32693742 | 0.00467602 |

|                 |          |            |            |
|-----------------|----------|------------|------------|
| ENSG00000169413 | RNASE6   | 2.32692653 | 0.0010458  |
| ENSG00000151702 | FLI1     | 2.31890751 | 0.00081022 |
| ENSG00000104974 | LILRA1   | 2.29125844 | 0.00474195 |
| ENSG00000127951 | FGL2     | 2.2824011  | 0.00089939 |
| ENSG00000166801 | FAM111A  | 2.26969444 | 0.00208192 |
| ENSG00000111269 | CREBL2   | 2.26874304 | 0.00458456 |
| ENSG00000164414 | SLC35A1  | 2.26564961 | 0.0022793  |
| ENSG00000170458 | CD14     | 2.25623821 | 0.01184035 |
| ENSG00000185745 | IFIT1    | 2.2531576  | 0.00089939 |
| ENSG00000068079 | IFI35    | 2.25305844 | 0.00098988 |
| ENSG00000258659 | TRIM34   | 2.24478854 | 0.00339437 |
| ENSG00000164125 | FAM198B  | 2.24095776 | 0.01271911 |
| ENSG00000065413 | ANKRD44  | 2.23995368 | 0.00068553 |
| ENSG00000138459 | SLC35A5  | 2.23385815 | 0.00360081 |
| ENSG00000204131 | NHSL2    | 2.23097905 | 0.00406198 |
| ENSG00000125703 | ATG4C    | 2.23095256 | 0.0047099  |
| ENSG00000107929 | LARP4B   | 2.22788083 | 0.00358122 |
| ENSG00000178685 | PARP10   | 2.22287319 | 0.00015003 |
| ENSG00000155097 | ATP6V1C1 | 2.21598765 | 0.00433873 |
| ENSG00000186088 | GSAP     | 2.21576679 | 0.00261709 |
| ENSG00000082996 | RNF13    | 2.21087655 | 0.00073864 |
| ENSG00000072501 | SMC1A    | 2.20979185 | 0.00376598 |
| ENSG00000096968 | JAK2     | 2.20812913 | 0.00130443 |
| ENSG00000198771 | RCSD1    | 2.20709862 | 0.00457885 |
| ENSG00000145781 | COMMD10  | 2.20515315 | 0.00155034 |
| ENSG00000136485 | DCAF7    | 2.19735281 | 0.01586099 |
| ENSG00000004455 | AK2      | 2.19351353 | 0.0008952  |
| ENSG00000115415 | STAT1    | 2.17610829 | 0.00211531 |
| ENSG00000102699 | PARP4    | 2.17444696 | 0.00340571 |
| ENSG00000025708 | TYMP     | 2.17024743 | 0.00563582 |
| ENSG00000103381 | CPPED1   | 2.16814525 | 0.00150263 |
| ENSG00000090861 | AARS     | 2.16649736 | 0.00043805 |
| ENSG00000093144 | ECHDC1   | 2.16126628 | 0.00419863 |
| ENSG00000143624 | INTS3    | 2.15695705 | 0.01343737 |
| ENSG00000113845 | TIMMDC1  | 2.15354406 | 0.00720168 |
| ENSG00000168310 | IRF2     | 2.15086059 | 0.0041688  |
| ENSG00000103313 | MEFV     | 2.14612293 | 0.00418017 |
| ENSG00000102893 | PHKB     | 2.14216041 | 0.00131723 |
| ENSG00000138413 | IDH1     | 2.14150089 | 0.00290205 |
| ENSG00000160593 | JAML     | 2.14039823 | 0.00460845 |
| ENSG00000145416 | MARCH1   | 2.13486128 | 0.00931242 |
| ENSG00000133106 | EPST11   | 2.13206205 | 0.00068553 |

|                 |            |            |            |
|-----------------|------------|------------|------------|
| ENSG00000159228 | CBR1       | 2.13014578 | 0.00045076 |
| ENSG00000116455 | WDR77      | 2.12930733 | 0.00358122 |
| ENSG00000137965 | IFI44      | 2.12777848 | 0.00876064 |
| ENSG00000166326 | TRIM44     | 2.1270268  | 0.00261709 |
| ENSG00000163606 | CD200R1    | 2.12284896 | 0.00152415 |
| ENSG00000112367 | FIG4       | 2.12218668 | 0.00167388 |
| ENSG00000103051 | COG4       | 2.1204803  | 0.00180663 |
| ENSG00000138078 | PREPL      | 2.12006781 | 0.01270208 |
| ENSG00000173821 | RNF213     | 2.11768767 | 0.00553015 |
| ENSG00000138246 | DNAJC13    | 2.11570284 | 0.00068553 |
| ENSG00000159131 | GART       | 2.11358372 | 0.00326645 |
| ENSG00000081087 | OSTM1      | 2.11289772 | 0.01186229 |
| ENSG00000101336 | HCK        | 2.09767392 | 0.00418283 |
| ENSG00000074706 | IPCEF1     | 2.09384519 | 0.02342212 |
| ENSG00000175857 | GAPT       | 2.08765079 | 0.00150263 |
| ENSG00000095585 | BLNK       | 2.08376627 | 0.00803214 |
| ENSG00000144218 | AFF3       | 2.08136827 | 0.01047324 |
| ENSG00000136279 | DBNL       | 2.07401784 | 0.00439901 |
| ENSG00000158517 | NCF1       | 2.06949637 | 0.02847331 |
| ENSG00000166888 | STAT6      | 2.06811372 | 0.00224048 |
| ENSG00000102189 | EEA1       | 2.06093793 | 0.00236146 |
| ENSG00000280153 | AC133065.6 | 2.06005278 | 0.01070935 |
| ENSG00000163563 | MNDA       | 2.05970748 | 0.0043897  |
| ENSG00000116824 | CD2        | 2.0576007  | 0.00073864 |
| ENSG00000117054 | ACADM      | 2.05707859 | 0.00152894 |
| ENSG00000162736 | NCSTN      | 2.05415475 | 0.00194739 |
| ENSG00000150681 | RGS18      | 2.05320806 | 0.00130443 |
| ENSG00000131844 | MCCC2      | 2.0530904  | 0.01886776 |
| ENSG00000107099 | DOCK8      | 2.0516027  | 0.00570959 |
| ENSG00000198814 | GK         | 2.04963172 | 0.00350313 |
| ENSG00000148634 | HERC4      | 2.04789706 | 0.00411384 |
| ENSG00000134851 | TMEM165    | 2.04511559 | 0.00084979 |
| ENSG00000136040 | PLXNC1     | 2.04407099 | 0.00885173 |
| ENSG00000139641 | ESYT1      | 2.02820528 | 0.00268199 |
| ENSG00000048052 | HDAC9      | 2.02033464 | 0.01399335 |
| ENSG00000124357 | NAGK       | 2.01980368 | 0.0012446  |
| ENSG00000158714 | SLAMF8     | 2.01655113 | 0.02493296 |
| ENSG00000090863 | GLG1       | 2.01630472 | 0.00703198 |
| ENSG00000134321 | RSAD2      | 2.01046868 | 0.00489118 |
| ENSG00000130021 | PUDP       | 2.00722498 | 0.00419863 |
| ENSG00000031081 | ARHGAP31   | 2.00094561 | 0.00235967 |
| ENSG00000164062 | APEH       | 1.99681356 | 0.00478686 |

|                 |          |            |            |
|-----------------|----------|------------|------------|
| ENSG00000158467 | AHCYL2   | 1.98490934 | 0.01332182 |
| ENSG00000184979 | USP18    | 1.98276515 | 0.00785233 |
| ENSG00000116990 | MYCL     | 1.98235502 | 0.00516637 |
| ENSG00000180353 | HCLS1    | 1.98216761 | 0.00090802 |
| ENSG00000121210 | TMEM131L | 1.98071161 | 0.00224427 |
| ENSG00000142089 | IFITM3   | 1.97921372 | 0.01850953 |
| ENSG00000100364 | KIAA0930 | 1.97310857 | 0.00090772 |
| ENSG00000070785 | EIF2B3   | 1.97182446 | 0.00068553 |
| ENSG00000163565 | IFI16    | 1.97135082 | 0.00322266 |
| ENSG00000134955 | SLC37A2  | 1.97090771 | 0.00376598 |
| ENSG00000079950 | STX7     | 1.96308556 | 0.00166984 |
| ENSG00000058668 | ATP2B4   | 1.96027503 | 0.00934972 |
| ENSG00000103544 | C16orf62 | 1.96011824 | 0.00248227 |
| ENSG00000141510 | TP53     | 1.9574839  | 0.00284279 |
| ENSG00000132182 | NUP210   | 1.94812233 | 0.01100861 |
| ENSG00000188419 | CHM      | 1.94649213 | 0.00235025 |
| ENSG00000134256 | CD101    | 1.94646613 | 0.0034249  |
| ENSG00000138646 | HERC5    | 1.94343046 | 0.00898743 |
| ENSG00000169220 | RGS14    | 1.94080353 | 0.00276203 |
| ENSG00000145348 | TBCK     | 1.93932334 | 0.00398077 |
| ENSG00000155957 | TMBIM4   | 1.93849172 | 0.00057232 |
| ENSG00000134255 | CEPT1    | 1.93725411 | 0.00656895 |
| ENSG00000112118 | MCM3     | 1.93115618 | 0.00553015 |
| ENSG00000134910 | STT3A    | 1.92914174 | 0.01415762 |
| ENSG00000157637 | SLC38A10 | 1.92596603 | 0.00200912 |
| ENSG00000100030 | MAPK1    | 1.92079694 | 0.00089939 |
| ENSG00000137752 | CASP1    | 1.91625457 | 0.00255612 |
| ENSG00000156110 | ADK      | 1.91186848 | 0.03702661 |
| ENSG00000010671 | BTK      | 1.9062616  | 0.00350274 |
| ENSG00000134318 | ROCK2    | 1.90399304 | 0.00430676 |
| ENSG00000160310 | PRMT2    | 1.9005587  | 0.00351578 |
| ENSG00000130309 | COLGALT1 | 1.90004736 | 0.00460345 |
| ENSG00000165071 | TMEM71   | 1.89529701 | 0.00356837 |
| ENSG00000243943 | ZNF512   | 1.88990246 | 0.00303209 |
| ENSG00000132256 | TRIM5    | 1.88565672 | 0.00229084 |
| ENSG00000273749 | CYFIP1   | 1.88474249 | 0.0066992  |
| ENSG00000133313 | CNDP2    | 1.88141659 | 0.0032195  |
| ENSG00000178537 | SLC25A20 | 1.88126405 | 0.00747632 |
| ENSG00000138642 | HERC6    | 1.88069728 | 0.00981248 |
| ENSG00000104998 | IL27RA   | 1.88021435 | 0.00089939 |
| ENSG00000184178 | SCFD2    | 1.87811894 | 0.00194739 |
| ENSG00000150867 | PIP4K2A  | 1.87751101 | 0.00205261 |

|                 |           |            |            |
|-----------------|-----------|------------|------------|
| ENSG00000135899 | SP110     | 1.87509223 | 0.00286812 |
| ENSG00000170854 | RIOX2     | 1.87144549 | 0.00472286 |
| ENSG00000214114 | MYCBP     | 1.87095474 | 0.00322031 |
| ENSG00000156587 | UBE2L6    | 1.86989923 | 0.00542396 |
| ENSG00000059377 | TBXAS1    | 1.86972621 | 0.00256622 |
| ENSG00000187688 | TRPV2     | 1.8686118  | 0.01599641 |
| ENSG00000111540 | RAB5B     | 1.85822044 | 0.00226659 |
| ENSG00000106780 | MEGF9     | 1.85807432 | 0.00309933 |
| ENSG00000110079 | MS4A4A    | 1.85718018 | 0.00107684 |
| ENSG00000169403 | PTAFR     | 1.85688839 | 0.0091414  |
| ENSG00000104972 | LILRB1    | 1.85246369 | 0.00656277 |
| ENSG00000188404 | SELL      | 1.84886004 | 0.02601302 |
| ENSG00000204261 | PSMB8-AS1 | 1.84595288 | 0.00947011 |
| ENSG00000103423 | DNAJA3    | 1.84202531 | 0.00058696 |
| ENSG00000008869 | HEATR5B   | 1.8416768  | 0.00089939 |
| ENSG00000198951 | NAGA      | 1.84079564 | 0.00525137 |
| ENSG00000144468 | RHBDD1    | 1.83990652 | 0.00652895 |
| ENSG00000185722 | ANKFY1    | 1.83883439 | 0.01278329 |
| ENSG00000136518 | ACTL6A    | 1.83498314 | 0.00330233 |
| ENSG00000103479 | RBL2      | 1.83345605 | 0.00107684 |
| ENSG00000163644 | PPM1K     | 1.83301931 | 0.00810903 |
| ENSG00000040933 | INPP4A    | 1.8290558  | 0.00351201 |
| ENSG00000109911 | ELP4      | 1.82900732 | 0.00431962 |
| ENSG00000143799 | PARP1     | 1.82636685 | 0.00888272 |
| ENSG00000126709 | IFI6      | 1.82601023 | 0.00130443 |
| ENSG00000143252 | SDHC      | 1.82148734 | 0.00109198 |
| ENSG00000178175 | ZNF366    | 1.81805716 | 0.00877547 |
| ENSG00000161955 | TNFSF13   | 1.8140582  | 0.00155034 |
| ENSG00000213445 | SIPA1     | 1.81355362 | 0.00155933 |
| ENSG00000187608 | ISG15     | 1.81101135 | 0.00349422 |
| ENSG00000136100 | VPS36     | 1.8056376  | 0.00393222 |
| ENSG00000014216 | CAPN1     | 1.80513921 | 0.00068553 |
| ENSG00000102316 | MAGED2    | 1.80374069 | 0.00599034 |
| ENSG00000182179 | UBA7      | 1.79549594 | 0.00581898 |
| ENSG00000129675 | ARHGEF6   | 1.79496177 | 0.00572497 |
| ENSG00000143110 | C1orf162  | 1.79134014 | 0.00113898 |
| ENSG00000111667 | USP5      | 1.78841999 | 0.00362829 |
| ENSG00000111481 | COPZ1     | 1.78766003 | 0.00155933 |
| ENSG00000014919 | COX15     | 1.78480081 | 0.01278329 |
| ENSG00000196511 | TPK1      | 1.78455658 | 0.00084372 |
| ENSG00000138496 | PARP9     | 1.78403341 | 0.0028424  |
| ENSG00000168538 | TRAPPC11  | 1.78376308 | 0.00095746 |

|                 |            |            |            |
|-----------------|------------|------------|------------|
| ENSG00000102710 | SUPT20H    | 1.78220368 | 0.0016072  |
| ENSG00000102524 | TNFSF13B   | 1.78177857 | 0.0015584  |
| ENSG00000136404 | TM6SF1     | 1.7797517  | 0.01106233 |
| ENSG00000143554 | SLC27A3    | 1.77628553 | 0.00383452 |
| ENSG00000165675 | ENOX2      | 1.77518869 | 0.00531959 |
| ENSG00000119471 | HSDL2      | 1.77443536 | 0.01839835 |
| ENSG00000166002 | SMCO4      | 1.771189   | 0.00652389 |
| ENSG00000160712 | IL6R       | 1.76704675 | 0.00509474 |
| ENSG00000243749 | TMEM35B    | 1.76307995 | 0.002218   |
| ENSG00000213983 | AP1G2      | 1.7561938  | 0.02118998 |
| ENSG00000111731 | C2CD5      | 1.74901382 | 0.00089939 |
| ENSG00000081189 | MEF2C      | 1.74589214 | 0.00328847 |
| ENSG00000108798 | ABI3       | 1.74419429 | 0.00606651 |
| ENSG00000140395 | WDR61      | 1.74340544 | 0.00568    |
| ENSG00000162704 | ARPC5      | 1.74224952 | 0.00236146 |
| ENSG00000104133 | SPG11      | 1.7409701  | 0.02029751 |
| ENSG00000088682 | COQ9       | 1.74064775 | 0.00089939 |
| ENSG00000135317 | SNX14      | 1.74050946 | 0.00068553 |
| ENSG00000149311 | ATM        | 1.73933874 | 0.00246913 |
| ENSG00000125124 | BBS2       | 1.73821256 | 0.00386312 |
| ENSG00000197798 | FAM118B    | 1.73605372 | 0.01373726 |
| ENSG00000105639 | JAK3       | 1.73481175 | 0.03835979 |
| ENSG00000105726 | ATP13A1    | 1.73232    | 0.00215982 |
| ENSG00000250138 | AC139495.3 | 1.73142998 | 0.01204627 |
| ENSG00000104365 | IKBKB      | 1.73039626 | 0.00170624 |
| ENSG00000165476 | REEP3      | 1.72913973 | 0.00190829 |
| ENSG00000140575 | IQGAP1     | 1.72869261 | 0.00068553 |
| ENSG00000189339 | SLC35E2B   | 1.72516176 | 0.0086378  |
| ENSG00000112079 | STK38      | 1.72055039 | 0.00243303 |
| ENSG00000149196 | HIKESHI    | 1.71739712 | 0.00080111 |
| ENSG00000160883 | HK3        | 1.71050513 | 0.00336571 |
| ENSG00000197157 | SND1       | 1.71045368 | 0.00235967 |
| ENSG00000134452 | FBXO18     | 1.70474196 | 0.00390878 |
| ENSG00000133103 | COG6       | 1.70350221 | 0.03295002 |
| ENSG00000172269 | DPAGT1     | 1.7034649  | 0.00923715 |
| ENSG00000071967 | CYBRD1     | 1.70229963 | 0.01899945 |
| ENSG00000169116 | PARM1      | 1.70212386 | 0.00581841 |
| ENSG00000132383 | RPA1       | 1.70063799 | 0.00278533 |
| ENSG00000121067 | SPOP       | 1.69949896 | 0.00398133 |
| ENSG00000187554 | TLR5       | 1.6992318  | 0.02127473 |
| ENSG00000163154 | TNFAIP8L2  | 1.69414654 | 0.00601809 |
| ENSG00000154822 | PLCL2      | 1.69378163 | 0.00852904 |



|                 |         |            |            |
|-----------------|---------|------------|------------|
| ENSG00000219545 | UMAD1   | 1.69103006 | 0.00229084 |
| ENSG00000166797 | FAM96A  | 1.690023   | 0.01107601 |
| ENSG00000026751 | SLAMF7  | 1.6850367  | 0.00419863 |
| ENSG00000155926 | SLA     | 1.68407908 | 0.00419863 |
| ENSG00000030066 | NUP160  | 1.68341977 | 0.0034249  |
| ENSG00000174944 | P2RY14  | 1.68228319 | 0.00359283 |
| ENSG00000164308 | ERAP2   | 1.68187261 | 0.00204546 |
| ENSG00000198876 | DCAF12  | 1.6788135  | 0.00418283 |
| ENSG00000099810 | MTAP    | 1.67769763 | 0.00688879 |
| ENSG00000157483 | MYO1E   | 1.67761878 | 0.00615876 |
| ENSG00000104518 | GSDMD   | 1.67618977 | 0.00221039 |
| ENSG00000119922 | IFIT2   | 1.675019   | 0.00402472 |
| ENSG00000033050 | ABCF2   | 1.67497452 | 0.00210312 |
| ENSG00000163840 | DTX3L   | 1.67472708 | 0.00338864 |
| ENSG00000170006 | TMEM154 | 1.67392517 | 0.0078963  |
| ENSG00000116005 | PCYOX1  | 1.669621   | 0.00077204 |
| ENSG00000121691 | CAT     | 1.66938691 | 0.00264994 |
| ENSG00000152683 | SLC30A6 | 1.66696901 | 0.02358751 |
| ENSG00000185973 | TMLHE   | 1.66541486 | 0.00719883 |
| ENSG00000138768 | USO1    | 1.66532486 | 0.00160581 |
| ENSG00000167797 | CDK2AP2 | 1.66381151 | 0.00464174 |
| ENSG00000117228 | GBP1    | 1.66192443 | 0.03832356 |
| ENSG00000125863 | MKKS    | 1.661671   | 0.00340571 |
| ENSG00000143493 | INTS7   | 1.66145404 | 0.00358122 |
| ENSG00000256043 | CTSO    | 1.65905713 | 0.00201407 |
| ENSG00000115234 | SNX17   | 1.65477931 | 0.00155933 |
| ENSG00000139687 | RB1     | 1.65432967 | 0.00599034 |
| ENSG00000134996 | OSTF1   | 1.65369005 | 0.00815818 |
| ENSG00000124942 | AHNAK   | 1.65160242 | 0.01310182 |
| ENSG00000132646 | PCNA    | 1.65025522 | 0.00075186 |
| ENSG00000119686 | FLVCR2  | 1.6496537  | 0.00409363 |
| ENSG00000139278 | GLIPR1  | 1.64663546 | 0.00668554 |
| ENSG00000143390 | RFX5    | 1.644153   | 0.0028804  |
| ENSG00000176783 | RUFY1   | 1.64278813 | 0.00019288 |
| ENSG00000110934 | BIN2    | 1.64169805 | 0.0076335  |
| ENSG00000162946 | DISC1   | 1.63975313 | 0.02702117 |
| ENSG00000118855 | MFSD1   | 1.63886239 | 0.00340003 |
| ENSG00000115204 | MPV17   | 1.63630852 | 0.00589844 |
| ENSG00000185885 | IFITM1  | 1.636154   | 0.0100445  |
| ENSG00000130150 | MOSPD2  | 1.63384537 | 0.02943076 |
| ENSG00000103047 | TANGO6  | 1.63139604 | 0.01973655 |
| ENSG00000116701 | NCF2    | 1.62979246 | 0.02288169 |

|                 |            |            |            |
|-----------------|------------|------------|------------|
| ENSG00000100714 | MTHFD1     | 1.62878459 | 0.00744894 |
| ENSG00000110665 | C11orf21   | 1.62866074 | 0.00233277 |
| ENSG00000006756 | ARSD       | 1.62737992 | 0.00261478 |
| ENSG00000167851 | CD300A     | 1.62451488 | 0.00424199 |
| ENSG00000186687 | LYRM7      | 1.62448007 | 0.01398358 |
| ENSG00000196510 | ANAPC7     | 1.62292839 | 0.01199328 |
| ENSG00000122025 | FLT3       | 1.62276623 | 0.00503046 |
| ENSG00000170876 | TMEM43     | 1.62113951 | 0.00351394 |
| ENSG00000104325 | DECR1      | 1.61561589 | 0.00648504 |
| ENSG00000183978 | COA3       | 1.61537192 | 0.00546142 |
| ENSG00000127946 | HIP1       | 1.61235796 | 0.01311257 |
| ENSG00000131828 | PDHA1      | 1.61121525 | 0.00224048 |
| ENSG00000138375 | SMARCAL1   | 1.60521453 | 0.01682839 |
| ENSG00000064115 | TM7SF3     | 1.60501436 | 0.02874989 |
| ENSG00000120860 | WASHC3     | 1.59995858 | 0.00951642 |
| ENSG00000181192 | DHTKD1     | 1.59870003 | 0.00337093 |
| ENSG00000101337 | TM9SF4     | 1.59776353 | 0.00419863 |
| ENSG00000124508 | BTN2A2     | 1.59672095 | 0.00803266 |
| ENSG00000163932 | PRKCD      | 1.59396075 | 0.00295864 |
| ENSG00000197548 | ATG7       | 1.59160887 | 0.00155933 |
| ENSG00000092531 | SNAP23     | 1.59108194 | 0.00330233 |
| ENSG00000128915 | ICE2       | 1.59062394 | 0.00580111 |
| ENSG00000136874 | STX17      | 1.59054099 | 0.00272216 |
| ENSG00000163389 | POGLUT1    | 1.58939529 | 0.00563712 |
| ENSG00000120451 | SNX19      | 1.58640112 | 0.00126831 |
| ENSG00000155659 | VSIG4      | 1.58489352 | 0.0408237  |
| ENSG00000137478 | FCHSD2     | 1.58247814 | 0.00660914 |
| ENSG00000160551 | TAOK1      | 1.58239354 | 0.0150404  |
| ENSG00000129691 | ASH2L      | 1.58217542 | 0.00478686 |
| ENSG00000155660 | PDIA4      | 1.57763287 | 0.00398077 |
| ENSG00000100201 | DDX17      | 1.57737112 | 0.03353705 |
| ENSG00000113522 | RAD50      | 1.57335076 | 0.00398077 |
| ENSG00000091106 | NLRC4      | 1.57239752 | 0.01243906 |
| ENSG00000124356 | STAMPB     | 1.57147346 | 0.02912533 |
| ENSG00000145246 | ATP10D     | 1.57110413 | 0.01169583 |
| ENSG00000134014 | ELP3       | 1.57089038 | 0.01831573 |
| ENSG00000142687 | KIAA0319L  | 1.57079909 | 0.00272842 |
| ENSG00000250687 | AC146944.2 | 1.57069338 | 0.01618458 |
| ENSG00000143106 | PSMA5      | 1.57054856 | 0.00303209 |
| ENSG00000106049 | HIBADH     | 1.56946545 | 0.00155933 |
| ENSG00000008130 | NADK       | 1.56913963 | 0.00155933 |
| ENSG00000173193 | PARP14     | 1.56722447 | 0.04430578 |

|                 |          |            |            |
|-----------------|----------|------------|------------|
| ENSG00000166145 | SPINT1   | 1.56706073 | 0.00261709 |
| ENSG00000168010 | ATG16L2  | 1.56683923 | 0.01188302 |
| ENSG00000163946 | FAM208A  | 1.56522132 | 0.00837266 |
| ENSG00000139163 | ETNK1    | 1.56452612 | 0.00391676 |
| ENSG00000123106 | CCDC91   | 1.56162639 | 0.00097295 |
| ENSG00000135842 | FAM129A  | 1.56093832 | 0.00961836 |
| ENSG00000184992 | BRI3BP   | 1.56076587 | 0.00653628 |
| ENSG00000130985 | UBA1     | 1.55856912 | 0.01170173 |
| ENSG00000007923 | DNAJC11  | 1.55848947 | 0.00232308 |
| ENSG00000229754 | CXCR2P1  | 1.55812835 | 0.0028754  |
| ENSG00000132274 | TRIM22   | 1.55293658 | 0.00530367 |
| ENSG00000148180 | GSN      | 1.55125534 | 0.03250746 |
| ENSG00000124532 | MRS2     | 1.54854827 | 0.00267271 |
| ENSG00000119906 | SLF2     | 1.54812256 | 0.00192901 |
| ENSG00000138594 | TMOD3    | 1.5475971  | 0.00349422 |
| ENSG00000254505 | CHMP4A   | 1.54643452 | 0.00089939 |
| ENSG00000147251 | DOCK11   | 1.54569043 | 0.00489336 |
| ENSG00000197943 | PLCG2    | 1.54491224 | 0.01603467 |
| ENSG00000155229 | MMS19    | 1.54354691 | 0.00355307 |
| ENSG00000108946 | PRKAR1A  | 1.54287173 | 0.00987036 |
| ENSG00000136628 | EPRS     | 1.54248327 | 0.00578374 |
| ENSG00000101096 | NFATC2   | 1.5422227  | 0.00697219 |
| ENSG00000100889 | PCK2     | 1.53930727 | 0.0174206  |
| ENSG00000158481 | CD1C     | 1.53806136 | 0.02980208 |
| ENSG0000018699  | TTC27    | 1.53740158 | 0.00401831 |
| ENSG00000171307 | ZDHHC16  | 1.53552972 | 0.00214395 |
| ENSG00000185324 | CDK10    | 1.53547738 | 0.00343119 |
| ENSG00000149269 | PAK1     | 1.53498981 | 0.04782639 |
| ENSG00000151116 | UEVLD    | 1.53468566 | 0.00115627 |
| ENSG00000138363 | ATIC     | 1.53434242 | 0.00548977 |
| ENSG00000108679 | LGALS3BP | 1.5335672  | 0.00709936 |
| ENSG00000137845 | ADAM10   | 1.53333701 | 0.00648504 |
| ENSG00000104812 | GYS1     | 1.53254233 | 0.00647532 |
| ENSG00000167272 | POP5     | 1.53225337 | 0.00476653 |
| ENSG00000109854 | HTATIP2  | 1.53116263 | 0.01097056 |
| ENSG00000113552 | GNPDA1   | 1.52780061 | 0.00116354 |
| ENSG00000189091 | SF3B3    | 1.52570221 | 0.0027654  |
| ENSG00000123213 | NLN      | 1.52198051 | 0.00810903 |
| ENSG00000138660 | AP1AR    | 1.5204922  | 0.01532212 |
| ENSG00000088888 | MAVS     | 1.52026475 | 0.02330006 |
| ENSG00000160326 | SLC2A6   | 1.51991534 | 0.01121565 |
| ENSG00000137509 | PRCP     | 1.51757796 | 0.02010187 |

|                 |            |            |            |
|-----------------|------------|------------|------------|
| ENSG00000168710 | AHCYL1     | 1.51740183 | 0.00205904 |
| ENSG00000166986 | MARS       | 1.51668507 | 0.00786406 |
| ENSG00000156017 | CARNMT1    | 1.51223681 | 0.00605285 |
| ENSG00000134369 | NAV1       | 1.51142591 | 0.01566357 |
| ENSG00000204713 | TRIM27     | 1.51001976 | 0.0028334  |
| ENSG00000151414 | NEK7       | 1.50940757 | 0.00142767 |
| ENSG00000188352 | FOCAD      | 1.50803856 | 0.0140459  |
| ENSG00000085224 | ATRX       | 1.50709992 | 0.00481717 |
| ENSG00000100442 | FKBP3      | 1.50707858 | 0.00393222 |
| ENSG00000010292 | NCAPD2     | 1.50618187 | 0.01643738 |
| ENSG00000118961 | LDAH       | 1.50329037 | 0.00088661 |
| ENSG00000092929 | UNC13D     | 1.50312908 | 0.00362829 |
| ENSG00000108439 | PNPO       | 1.50146753 | 0.00837266 |
| ENSG00000009790 | TRAF3IP3   | 1.50121255 | 0.00174835 |
| ENSG00000136169 | SETDB2     | 1.50094086 | 0.00497876 |
| ENSG00000110931 | CAMKK2     | 1.50039673 | 0.0048661  |
| ENSG00000123689 | G0S2       | -7.6084168 | 0.02613793 |
| ENSG00000161921 | CXCL16     | -4.5620958 | 0.01042913 |
| ENSG00000112149 | CD83       | -4.5009312 | 0.03606944 |
| ENSG00000095794 | CREM       | -4.4779198 | 0.01900203 |
| ENSG00000166920 | C15orf48   | -4.0542904 | 0.01764021 |
| ENSG00000113448 | PDE4D      | -3.9972163 | 0.02161677 |
| ENSG00000118515 | SGK1       | -3.9960238 | 0.00395078 |
| ENSG00000088826 | SMOX       | -3.9659598 | 0.03956602 |
| ENSG00000120063 | GNA13      | -3.8727133 | 0.02583179 |
| ENSG00000162496 | DHRS3      | -3.8716416 | 0.01786884 |
| ENSG00000090104 | RGS1       | -3.8422815 | 0.02570437 |
| ENSG00000163376 | KBTBD8     | -3.8282484 | 0.00666811 |
| ENSG00000104312 | RIPK2      | -3.80965   | 0.00516045 |
| ENSG00000186594 | MIR22HG    | -3.717995  | 0.00597583 |
| ENSG00000100644 | HIF1A      | -3.5700622 | 0.00489336 |
| ENSG00000170525 | PFKFB3     | -3.4828636 | 0.0356038  |
| ENSG00000140379 | BCL2A1     | -3.4594922 | 0.01833318 |
| ENSG00000122644 | ARL4A      | -3.4288512 | 0.00758077 |
| ENSG00000130340 | SNX9       | -3.4221805 | 0.01121546 |
| ENSG00000008083 | JARID2     | -3.3861327 | 0.01931415 |
| ENSG00000143507 | DUSP10     | -3.351403  | 0.00758077 |
| ENSG00000217801 | AL390719.1 | -3.3393149 | 0.04447417 |
| ENSG00000145860 | RNF145     | -3.3305447 | 0.00043805 |
| ENSG00000169155 | ZBTB43     | -3.3242159 | 0.00073864 |
| ENSG00000184205 | TSPYL2     | -3.3190953 | 0.01986667 |
| ENSG00000131669 | NINJ1      | -3.3057839 | 0.00354594 |

|                 |            |            |            |
|-----------------|------------|------------|------------|
| ENSG00000160223 | ICOSLG     | -3.244978  | 0.00747632 |
| ENSG00000231721 | LINC-PINT  | -3.237142  | 0.02215288 |
| ENSG00000173166 | RAPH1      | -3.2366725 | 0.02706525 |
| ENSG00000255073 | ZFP91-CNTF | -3.2069268 | 0.00316541 |
| ENSG00000155307 | SAMSN1     | -3.1958956 | 0.01212833 |
| ENSG00000169508 | GPR183     | -3.1649492 | 0.00084979 |
| ENSG00000167996 | FTH1       | -3.1220734 | 0.00418283 |
| ENSG00000153234 | NR4A2      | -3.1215849 | 0.03084488 |
| ENSG00000113070 | HBEGF      | -3.1121736 | 0.01863785 |
| ENSG00000173334 | TRIB1      | -3.1114145 | 0.0220503  |
| ENSG00000154640 | BTG3       | -3.1046384 | 0.00133507 |
| ENSG00000166128 | RAB8B      | -3.1014849 | 0.03010848 |
| ENSG00000132906 | CASP9      | -3.0953133 | 0.03939224 |
| ENSG00000180530 | NRIP1      | -3.0636904 | 0.00339177 |
| ENSG00000125538 | IL1B       | -3.0506771 | 0.00688974 |
| ENSG00000135604 | STX11      | -3.039988  | 0.0030748  |
| ENSG00000120705 | ETF1       | -3.036428  | 0.00817205 |
| ENSG00000011422 | PLAUR      | -3.0294006 | 0.00817205 |
| ENSG00000272888 | LINC01578  | -3.0146861 | 0.01208127 |
| ENSG00000165030 | NFIL3      | -3.0104971 | 0.00601809 |
| ENSG00000168036 | CTNNB1     | -3.0086254 | 0.01162234 |
| ENSG00000146457 | WTAP       | -2.9875884 | 0.00311935 |
| ENSG00000277117 | FP565260.3 | -2.9712348 | 0.0112941  |
| ENSG00000143622 | RIT1       | -2.9564428 | 0.02044292 |
| ENSG00000102760 | RGCC       | -2.9555816 | 0.00503046 |
| ENSG00000175130 | MARCKSL1   | -2.9550318 | 0.02165853 |
| ENSG00000171488 | LRRC8C     | -2.9124449 | 0.00987036 |
| ENSG00000140564 | FURIN      | -2.9117479 | 0.02813783 |
| ENSG00000132952 | USPL1      | -2.8997561 | 0.0030748  |
| ENSG00000169895 | SYAP1      | -2.8975029 | 0.03098433 |
| ENSG00000132819 | RBM38      | -2.8929631 | 0.02885702 |
| ENSG00000057657 | PRDM1      | -2.8814963 | 0.02297287 |
| ENSG00000106004 | HOXA5      | -2.8736118 | 0.01402569 |
| ENSG00000137936 | BCAR3      | -2.8427275 | 0.04935297 |
| ENSG00000117036 | ETV3       | -2.8424885 | 0.04129631 |
| ENSG00000140743 | CDR2       | -2.8211935 | 0.01278329 |
| ENSG00000175040 | CHST2      | -2.8202678 | 0.04101553 |
| ENSG00000197170 | PSMD12     | -2.8030745 | 0.00068553 |
| ENSG00000211445 | GPX3       | -2.7908858 | 0.0279606  |
| ENSG00000075426 | FOSL2      | -2.784013  | 0.02667059 |
| ENSG00000138166 | DUSP5      | -2.7541356 | 0.02403311 |
| ENSG00000162772 | ATF3       | -2.7312135 | 0.00375073 |

|                 |                  |            |            |
|-----------------|------------------|------------|------------|
| ENSG00000185022 | MAFF             | -2.7224192 | 0.01710678 |
| ENSG00000114784 | EIF1B            | -2.7198084 | 0.00156522 |
| ENSG00000186660 | ZFP91            | -2.7136779 | 0.00360138 |
| ENSG00000110852 | CLEC2B           | -2.7117292 | 0.03716562 |
| ENSG00000125657 | TNFSF9           | -2.6940337 | 0.00170624 |
| ENSG00000162711 | NLRP3            | -2.6934593 | 0.02305255 |
| ENSG00000271614 | ATP2B1-AS1       | -2.6879716 | 0.00430935 |
| ENSG00000011566 | MAP4K3           | -2.6859818 | 0.01043629 |
| ENSG00000277632 | CCL3             | -2.6812142 | 0.00193765 |
| ENSG00000141682 | PMAIP1           | -2.6736041 | 0.00340571 |
| ENSG00000025156 | HSF2             | -2.6655426 | 0.00107181 |
| ENSG00000015475 | BID              | -2.632563  | 0.03295002 |
| ENSG00000261740 | BOLA2-<br>SMG1P6 | -2.629706  | 0.00122855 |
| ENSG00000136738 | STAM             | -2.6137392 | 0.01121546 |
| ENSG00000239305 | RNF103           | -2.6050891 | 0.00152893 |
| ENSG00000117000 | RLF              | -2.604355  | 0.00200912 |
| ENSG00000102908 | NFAT5            | -2.6031591 | 0.0113783  |
| ENSG00000100600 | LGMN             | -2.5968497 | 0.04577179 |
| ENSG00000173812 | EIF1             | -2.5962337 | 0.00204067 |
| ENSG00000110721 | CHKA             | -2.581298  | 0.01251936 |
| ENSG00000180628 | PCGF5            | -2.5780265 | 0.00326645 |
| ENSG00000105835 | NAMPT            | -2.5580719 | 0.0357451  |
| ENSG00000131408 | NR1H2            | -2.5564414 | 0.0084248  |
| ENSG00000228830 | AL160408.2       | -2.5536041 | 0.02501364 |
| ENSG00000122068 | FYTTD1           | -2.5491067 | 0.00096838 |
| ENSG00000123091 | RNF11            | -2.5393281 | 0.00356837 |
| ENSG00000147119 | CHST7            | -2.5367945 | 0.00858563 |
| ENSG00000221869 | CEBPD            | -2.533836  | 0.00120407 |
| ENSG00000141506 | PIK3R5           | -2.5294937 | 0.04023237 |
| ENSG00000139832 | RAB20            | -2.5208739 | 0.01470183 |
| ENSG00000020633 | RUNX3            | -2.5173964 | 0.00609972 |
| ENSG00000120616 | EPC1             | -2.511977  | 0.00599216 |
| ENSG00000156671 | SAMD8            | -2.5026093 | 0.00182038 |
| ENSG00000118689 | FOXO3            | -2.4834505 | 0.00654052 |
| ENSG00000112511 | PHF1             | -2.4821148 | 0.03838578 |
| ENSG00000168264 | IRF2BP2          | -2.4705596 | 0.0088892  |
| ENSG00000136950 | ARPC5L           | -2.4661936 | 0.00546681 |
| ENSG00000123358 | NR4A1            | -2.4608666 | 0.00169166 |
| ENSG00000144802 | NFKBIZ           | -2.460033  | 0.01089345 |
| ENSG00000155252 | PI4K2A           | -2.4575166 | 0.00425322 |
| ENSG00000126524 | SBDS             | -2.4403481 | 0.00186519 |

|                 |            |            |            |
|-----------------|------------|------------|------------|
| ENSG00000138069 | RAB1A      | -2.4313541 | 0.00759346 |
| ENSG00000196843 | ARID5A     | -2.4206069 | 0.00418283 |
| ENSG00000086062 | B4GALT1    | -2.4193901 | 0.01382481 |
| ENSG00000175606 | TMEM70     | -2.4157729 | 0.00451031 |
| ENSG00000105856 | HBP1       | -2.4083623 | 0.00068687 |
| ENSG00000055483 | USP36      | -2.4070147 | 0.02957349 |
| ENSG00000113369 | ARRDC3     | -2.4042168 | 0.02261771 |
| ENSG00000100614 | PPM1A      | -2.3961858 | 0.00130443 |
| ENSG00000107937 | GTPBP4     | -2.3954039 | 0.01170173 |
| ENSG00000145675 | PIK3R1     | -2.3823332 | 0.02075998 |
| ENSG00000171867 | PRNP       | -2.3817915 | 0.00187431 |
| ENSG00000155304 | HSPA13     | -2.3758936 | 0.00068553 |
| ENSG00000013441 | CLK1       | -2.3717733 | 0.00509881 |
| ENSG00000123908 | AGO2       | -2.3688319 | 0.04186509 |
| ENSG00000059804 | SLC2A3     | -2.3674552 | 0.03311309 |
| ENSG00000177426 | TGIF1      | -2.3650867 | 0.00541373 |
| ENSG00000196428 | TSC22D2    | -2.3621518 | 0.00084979 |
| ENSG00000152484 | USP12      | -2.3562138 | 0.00628144 |
| ENSG00000128272 | ATF4       | -2.3559686 | 0.00089939 |
| ENSG00000087074 | PPP1R15A   | -2.3477231 | 0.01230525 |
| ENSG00000213923 | CSNK1E     | -2.3443671 | 0.00599034 |
| ENSG00000166165 | CKB        | -2.3365594 | 0.00191753 |
| ENSG00000122862 | SRGN       | -2.3273528 | 0.00167388 |
| ENSG00000124762 | CDKN1A     | -2.3268303 | 0.00479775 |
| ENSG00000137409 | MTCH1      | -2.3223044 | 0.01442877 |
| ENSG00000101558 | VAPA       | -2.3187794 | 0.00701573 |
| ENSG00000171522 | PTGER4     | -2.3166235 | 0.00843969 |
| ENSG00000025772 | TOMM34     | -2.315441  | 0.00854947 |
| ENSG00000120690 | ELF1       | -2.3099373 | 0.00131723 |
| ENSG00000186162 | CIDECP     | -2.3095705 | 0.00460845 |
| ENSG00000115165 | CYTIP      | -2.3070301 | 0.0084484  |
| ENSG00000173575 | CHD2       | -2.300325  | 0.00152893 |
| ENSG00000151553 | FAM160B1   | -2.2992749 | 0.00272842 |
| ENSG00000259884 | AC025259.3 | -2.2984853 | 0.00153329 |
| ENSG00000176946 | THAP4      | -2.2948812 | 0.02164364 |
| ENSG00000100906 | NFKBIA     | -2.2869631 | 0.00120407 |
| ENSG00000132326 | PER2       | -2.284667  | 0.00190217 |
| ENSG00000083799 | CYLD       | -2.2825129 | 0.00342468 |
| ENSG00000105968 | H2AFV      | -2.2815598 | 0.00837434 |
| ENSG00000027697 | IFNGR1     | -2.2789363 | 0.00068553 |
| ENSG00000086666 | ZFAND6     | -2.2765428 | 0.0028622  |
| ENSG00000108179 | PPIF       | -2.2745121 | 0.01004343 |

|                 |            |            |            |
|-----------------|------------|------------|------------|
| ENSG00000143153 | ATP1B1     | -2.2691712 | 0.00478686 |
| ENSG00000114098 | ARMC8      | -2.2609608 | 0.00199149 |
| ENSG00000141580 | WDR45B     | -2.2609042 | 0.00977231 |
| ENSG00000166669 | ATF7IP2    | -2.2602164 | 0.02069455 |
| ENSG00000082153 | BZW1       | -2.2562513 | 0.01364735 |
| ENSG00000256235 | SMIM3      | -2.2558118 | 0.00772947 |
| ENSG00000116044 | NFE2L2     | -2.255481  | 0.00359283 |
| ENSG00000134107 | BHLHE40    | -2.2548603 | 0.00929148 |
| ENSG00000154710 | RABGEF1    | -2.2496546 | 0.03965112 |
| ENSG00000030110 | BAK1       | -2.2473536 | 0.04265766 |
| ENSG00000185728 | YTHDF3     | -2.2411364 | 0.00209529 |
| ENSG00000069956 | MAPK6      | -2.2409442 | 0.00130054 |
| ENSG00000137331 | IER3       | -2.2285083 | 0.01475667 |
| ENSG00000270681 | AC095055.1 | -2.2274383 | 0.00337861 |
| ENSG00000121966 | CXCR4      | -2.224568  | 0.00709936 |
| ENSG00000165233 | CARD19     | -2.2243595 | 0.02956604 |
| ENSG00000176407 | KCMF1      | -2.220784  | 0.0128914  |
| ENSG00000023734 | STRAP      | -2.2162293 | 0.01354867 |
| ENSG00000239857 | GET4       | -2.2154294 | 0.00077204 |
| ENSG00000176845 | METRNL     | -2.2127164 | 0.0012446  |
| ENSG00000272886 | DCP1A      | -2.2052986 | 6.3344E-05 |
| ENSG00000136603 | SKIL       | -2.203748  | 0.03903684 |
| ENSG00000112245 | PTP4A1     | -2.2015299 | 0.0214355  |
| ENSG00000102265 | TIMP1      | -2.1948074 | 0.0034608  |
| ENSG00000079332 | SAR1A      | -2.190543  | 0.03812963 |
| ENSG00000005483 | KMT2E      | -2.1903478 | 0.02518335 |
| ENSG00000091317 | CMTM6      | -2.1902788 | 0.00520463 |
| ENSG00000101544 | ADNP2      | -2.1847581 | 0.01951335 |
| ENSG00000006451 | RALA       | -2.1830848 | 0.01575296 |
| ENSG00000159128 | IFNGR2     | -2.1825726 | 0.00632567 |
| ENSG00000153066 | TXNDC11    | -2.1784838 | 0.00582255 |
| ENSG00000182831 | C16orf72   | -2.1781934 | 0.00940502 |
| ENSG00000005379 | TSPOAP1    | -2.1779897 | 0.04328864 |
| ENSG00000068697 | LAPTM4A    | -2.1749313 | 0.01217754 |
| ENSG00000171604 | CXXC5      | -2.1725344 | 0.00509474 |
| ENSG00000119801 | YPEL5      | -2.1686411 | 0.01396869 |
| ENSG00000140941 | MAP1LC3B   | -2.1642957 | 0.00272842 |
| ENSG00000117569 | PTBP2      | -2.1642283 | 0.01869289 |
| ENSG00000135018 | UBQLN1     | -2.1582418 | 0.00655063 |
| ENSG00000145241 | CENPC      | -2.1575822 | 0.02464372 |
| ENSG00000196396 | PTPN1      | -2.1570102 | 0.03002164 |
| ENSG00000162511 | LAPTM5     | -2.1549726 | 0.03818104 |



|                 |            |            |            |
|-----------------|------------|------------|------------|
| ENSG00000078269 | SYNJ2      | -2.1548806 | 0.04403393 |
| ENSG00000163961 | RNF168     | -2.1499857 | 0.00578065 |
| ENSG00000134480 | CCNH       | -2.1479935 | 0.02504962 |
| ENSG00000092820 | EZR        | -2.1437161 | 0.02593285 |
| ENSG00000106610 | STAG3L4    | -2.143527  | 0.00599034 |
| ENSG00000065809 | FAM107B    | -2.1424545 | 0.00970995 |
| ENSG00000151247 | EIF4E      | -2.141887  | 0.00276203 |
| ENSG00000260708 | AL118516.1 | -2.1401102 | 0.00272216 |
| ENSG00000169251 | NMD3       | -2.1376019 | 0.00360081 |
| ENSG00000005812 | FBXL3      | -2.1372538 | 0.00669784 |
| ENSG00000183696 | UPP1       | -2.1346803 | 0.0030247  |
| ENSG00000101421 | CHMP4B     | -2.13348   | 0.0084259  |
| ENSG00000116741 | RGS2       | -2.1331362 | 0.00388647 |
| ENSG00000163877 | SNIP1      | -2.1286004 | 0.00340571 |
| ENSG00000131263 | RLIM       | -2.1271499 | 0.00885186 |
| ENSG00000182149 | IST1       | -2.1220026 | 0.00068553 |
| ENSG00000100401 | RANGAP1    | -2.117229  | 0.01141344 |
| ENSG00000115548 | KDM3A      | -2.1165221 | 0.00728599 |
| ENSG00000101782 | RIOK3      | -2.1149049 | 0.00464235 |
| ENSG00000185477 | GPRIN3     | -2.113831  | 0.00084979 |
| ENSG00000107263 | RAPGEF1    | -2.1097344 | 0.02971227 |
| ENSG00000184007 | PTP4A2     | -2.1085876 | 0.00362616 |
| ENSG00000019995 | ZRANB1     | -2.1078433 | 0.00541373 |
| ENSG00000224531 | SMIM13     | -2.1078034 | 0.02714729 |
| ENSG00000205423 | CNEP1R1    | -2.1062582 | 0.02888384 |
| ENSG00000130522 | JUND       | -2.1045991 | 0.00709518 |
| ENSG00000171988 | JMJD1C     | -2.1019    | 0.00283377 |
| ENSG00000121274 | PAPD5      | -2.0987985 | 0.03894852 |
| ENSG00000106635 | BCL7B      | -2.092901  | 0.00023522 |
| ENSG00000138081 | FBXO11     | -2.082102  | 0.00084979 |
| ENSG00000184182 | UBE2F      | -2.0783818 | 0.00465281 |
| ENSG00000140332 | TLE3       | -2.0771629 | 0.02785036 |
| ENSG00000121671 | CRY2       | -2.0757999 | 0.015409   |
| ENSG00000197061 | HIST1H4C   | -2.075254  | 0.02335005 |
| ENSG00000138750 | NUP54      | -2.0752146 | 0.00345464 |
| ENSG00000126775 | ATG14      | -2.0750812 | 0.00702311 |
| ENSG00000078804 | TP53INP2   | -2.0749929 | 0.00215171 |
| ENSG00000160570 | DEDD2      | -2.0734776 | 0.00300687 |
| ENSG00000070495 | JMJD6      | -2.0730925 | 0.00020762 |
| ENSG00000135404 | CD63       | -2.0723006 | 0.02502702 |
| ENSG00000137947 | GTF2B      | -2.0715962 | 0.00166984 |
| ENSG00000136732 | GYPC       | -2.0682301 | 0.00573304 |

|                 |            |            |            |
|-----------------|------------|------------|------------|
| ENSG00000165195 | PIGA       | -2.0645569 | 0.00842185 |
| ENSG00000132475 | H3F3B      | -2.0602954 | 0.00669784 |
| ENSG00000111832 | RWDD1      | -2.0599284 | 0.01295877 |
| ENSG00000174574 | AKIRIN1    | -2.0497049 | 0.00218967 |
| ENSG00000164823 | OSGIN2     | -2.0493887 | 0.00240547 |
| ENSG00000117318 | ID3        | -2.0457496 | 0.03864295 |
| ENSG00000085433 | WDR47      | -2.0428813 | 0.01756356 |
| ENSG00000102034 | ELF4       | -2.0396186 | 0.02228775 |
| ENSG00000101216 | GMEB2      | -2.039088  | 0.00363002 |
| ENSG00000115520 | COQ10B     | -2.0383301 | 0.00340571 |
| ENSG00000178381 | ZFAND2A    | -2.0345729 | 0.00503046 |
| ENSG00000105193 | RPS16      | -2.0333475 | 0.02582355 |
| ENSG00000164211 | STARD4     | -2.031064  | 0.04103226 |
| ENSG00000008294 | SPAG9      | -2.0306064 | 0.01396572 |
| ENSG00000143384 | MCL1       | -2.0302729 | 0.02313935 |
| ENSG00000033327 | GAB2       | -2.0297601 | 0.01533113 |
| ENSG00000241978 | AKAP2      | -2.0291565 | 0.01179582 |
| ENSG00000185947 | ZNF267     | -2.0266958 | 0.00660914 |
| ENSG00000006607 | FARP2      | -2.0249938 | 0.00572652 |
| ENSG00000083937 | CHMP2B     | -2.0232671 | 0.00155933 |
| ENSG00000183735 | TBK1       | -2.0229868 | 0.00068553 |
| ENSG00000132823 | OSER1      | -2.0215438 | 0.00581841 |
| ENSG00000174738 | NR1D2      | -2.019269  | 0.00174835 |
| ENSG00000162664 | ZNF326     | -2.0174041 | 0.00088661 |
| ENSG00000263020 | AL662899.2 | -2.0171997 | 0.00303209 |
| ENSG00000100225 | FBXO7      | -2.0112347 | 0.002218   |
| ENSG00000198833 | UBE2J1     | -2.0108671 | 0.02781843 |
| ENSG00000137309 | HMGA1      | -2.0106825 | 0.01380074 |
| ENSG00000161835 | GRASP      | -2.0106253 | 0.0239467  |
| ENSG00000072110 | ACTN1      | -2.0082421 | 0.02476494 |
| ENSG00000167491 | GATAD2A    | -2.0076679 | 0.0126736  |
| ENSG00000113742 | CPEB4      | -2.0063751 | 0.00629665 |
| ENSG00000051108 | HERPUD1    | -2.0029501 | 0.00168749 |
| ENSG00000118503 | TNFAIP3    | -2.0020555 | 0.02209667 |
| ENSG00000100393 | EP300      | -2.0018885 | 0.00200055 |
| ENSG00000010072 | SPRTN      | -2.0009042 | 0.00155933 |
| ENSG00000075415 | SLC25A3    | -1.9977476 | 0.01300954 |
| ENSG00000141551 | CSNK1D     | -1.9973424 | 0.03828641 |
| ENSG00000115816 | CEBPZ      | -1.9962322 | 0.00261709 |
| ENSG00000104450 | SPAG1      | -1.9958727 | 0.00940502 |
| ENSG00000140044 | JDP2       | -1.9942568 | 0.00710159 |
| ENSG00000165650 | PDZD8      | -1.9925158 | 0.01583418 |

|                 |             |            |            |
|-----------------|-------------|------------|------------|
| ENSG00000165806 | CASP7       | -1.9923525 | 0.00433347 |
| ENSG00000121749 | TBC1D15     | -1.9913267 | 0.00073864 |
| ENSG00000135655 | USP15       | -1.990058  | 0.00157557 |
| ENSG00000090339 | ICAM1       | -1.985087  | 0.0011615  |
| ENSG00000124782 | RREB1       | -1.9848633 | 0.01993667 |
| ENSG00000187522 | HSPA14      | -1.984788  | 0.00148654 |
| ENSG00000104969 | SGTA        | -1.9845314 | 0.00406198 |
| ENSG00000102580 | DNAJC3      | -1.9826848 | 0.00316541 |
| ENSG00000069849 | ATP1B3      | -1.9803725 | 0.03301678 |
| ENSG00000107372 | ZFAND5      | -1.9774872 | 0.00335516 |
| ENSG00000130202 | NECTIN2     | -1.9702677 | 0.04379249 |
| ENSG00000109332 | UBE2D3      | -1.9694495 | 0.00669784 |
| ENSG00000146232 | NFKBIE      | -1.9685766 | 0.00368511 |
| ENSG00000067064 | IDI1        | -1.9666984 | 0.00513019 |
| ENSG00000183484 | GPR132      | -1.964038  | 0.03115245 |
| ENSG00000137876 | RSL24D1     | -1.9635082 | 0.00791952 |
| ENSG00000131051 | RBM39       | -1.9634459 | 0.006914   |
| ENSG00000117410 | ATP6V0B     | -1.9594605 | 0.00200357 |
| ENSG00000173875 | ZNF791      | -1.9582482 | 0.00563712 |
| ENSG00000108932 | SLC16A6     | -1.9581589 | 0.00509474 |
| ENSG00000114120 | SLC25A36    | -1.9569907 | 0.00328847 |
| ENSG00000119523 | ALG2        | -1.9567845 | 0.00517978 |
| ENSG00000196704 | AMZ2        | -1.9557548 | 0.03094864 |
| ENSG00000180611 | MB21D2      | -1.9555644 | 0.00194739 |
| ENSG00000163874 | ZC3H12A     | -1.953556  | 0.00345283 |
| ENSG00000113811 | SELENOK     | -1.9509753 | 0.00697219 |
| ENSG00000182481 | KPNA2       | -1.9417789 | 0.00454367 |
| ENSG00000139826 | ABHD13      | -1.9402662 | 0.00068553 |
| ENSG00000104064 | GABPB1      | -1.9400449 | 0.00677138 |
| ENSG00000134758 | RNF138      | -1.938487  | 0.00566992 |
| ENSG00000116786 | PLEKHM2     | -1.9376457 | 0.03167434 |
| ENSG00000140367 | UBE2Q2      | -1.9372058 | 0.00296499 |
| ENSG00000283154 | IQCJ-SCHIP1 | -1.9349819 | 0.02389596 |
| ENSG00000156273 | BACH1       | -1.9305297 | 0.00988027 |
| ENSG00000117139 | KDM5B       | -1.9272034 | 0.04200804 |
| ENSG00000150991 | UBC         | -1.9263115 | 0.01118305 |
| ENSG00000172845 | SP3         | -1.9239939 | 0.00058696 |
| ENSG00000111011 | RSRC2       | -1.9205933 | 0.00068553 |
| ENSG00000124766 | SOX4        | -1.9189514 | 0.02692794 |
| ENSG00000145780 | FEM1C       | -1.9187959 | 0.04665951 |
| ENSG00000157954 | WIPI2       | -1.916411  | 0.00467602 |
| ENSG00000121879 | PIK3CA      | -1.9146928 | 0.03693198 |

|                 |            |            |            |
|-----------------|------------|------------|------------|
| ENSG00000132912 | DCTN4      | -1.9131747 | 0.00489427 |
| ENSG00000143761 | ARF1       | -1.9111358 | 0.00308134 |
| ENSG00000171310 | CHST11     | -1.9077359 | 0.01618175 |
| ENSG00000189376 | C8orf76    | -1.9070412 | 0.00652677 |
| ENSG00000109787 | KLF3       | -1.9062143 | 0.00418283 |
| ENSG00000159346 | ADIPOR1    | -1.9041438 | 0.00214395 |
| ENSG00000070501 | POLB       | -1.9013523 | 0.00599034 |
| ENSG00000267520 | AC010733.2 | -1.9013328 | 0.00224048 |
| ENSG00000163811 | WDR43      | -1.9006545 | 0.00284279 |
| ENSG00000057757 | PITHD1     | -1.8991198 | 0.00541373 |
| ENSG00000178127 | NDUFV2     | -1.8977143 | 0.00068553 |
| ENSG00000197872 | FAM49A     | -1.8976251 | 0.00642418 |
| ENSG00000158122 | AAED1      | -1.8922164 | 0.00828958 |
| ENSG00000183624 | HMCES      | -1.8915489 | 0.00155927 |
| ENSG00000279766 | AC067931.1 | -1.8906824 | 0.01405517 |
| ENSG00000125037 | EMC3       | -1.890385  | 0.00541373 |
| ENSG00000123562 | MORF4L2    | -1.8875291 | 0.00391676 |
| ENSG00000156535 | CD109      | -1.8867933 | 0.00907356 |
| ENSG00000173349 | SFT2D3     | -1.8852676 | 0.00272216 |
| ENSG00000137817 | PARP6      | -1.8848749 | 0.01481879 |
| ENSG00000122257 | RBBP6      | -1.8831845 | 0.00570959 |
| ENSG00000161011 | SQSTM1     | -1.8818954 | 0.00068553 |
| ENSG00000251022 | THAP9-AS1  | -1.879013  | 0.03173612 |
| ENSG00000197619 | ZNF615     | -1.8774678 | 0.03738591 |
| ENSG00000164169 | PRMT9      | -1.8770873 | 0.00113486 |
| ENSG00000162616 | DNAJB4     | -1.8748711 | 0.00197763 |
| ENSG00000166200 | COPS2      | -1.8744975 | 0.00217078 |
| ENSG00000160789 | LMNA       | -1.8728405 | 0.01500442 |
| ENSG00000128271 | ADORA2A    | -1.8721744 | 0.00581841 |
| ENSG00000162924 | REL        | -1.8707183 | 0.00562921 |
| ENSG00000180228 | PRKRA      | -1.8703994 | 0.00068553 |
| ENSG00000138670 | RASGEF1B   | -1.8692749 | 0.01681053 |
| ENSG00000170852 | KBTBD2     | -1.8689308 | 0.00541373 |
| ENSG00000130559 | CAMSAP1    | -1.8685161 | 0.04305401 |
| ENSG00000100425 | BRD1       | -1.8681931 | 0.01639526 |
| ENSG00000056972 | TRAF3IP2   | -1.8659941 | 0.00355307 |
| ENSG00000196646 | ZNF136     | -1.8650425 | 0.00764292 |
| ENSG00000168175 | MAPK1IP1L  | -1.8646852 | 0.00368155 |
| ENSG00000139725 | RHOF       | -1.8612864 | 0.00089939 |
| ENSG00000116670 | MAD2L2     | -1.860474  | 0.00520463 |
| ENSG00000160799 | CCDC12     | -1.8604399 | 0.00179151 |
| ENSG00000110046 | ATG2A      | -1.8574903 | 0.04672487 |

|                 |            |            |            |
|-----------------|------------|------------|------------|
| ENSG00000156232 | WHAMM      | -1.8571372 | 0.0069367  |
| ENSG0000044574  | HSPA5      | -1.8566284 | 0.03098812 |
| ENSG00000156875 | MFSD14A    | -1.8550645 | 0.00100563 |
| ENSG00000127824 | TUBA4A     | -1.854568  | 0.0356038  |
| ENSG00000144747 | TMF1       | -1.8533699 | 0.01907077 |
| ENSG00000113575 | PPP2CA     | -1.845288  | 0.00155927 |
| ENSG00000166822 | TMEM170A   | -1.8428681 | 0.00028968 |
| ENSG00000114796 | KLHL24     | -1.8426384 | 0.01944808 |
| ENSG00000122406 | RPL5       | -1.8421604 | 0.00084979 |
| ENSG00000091527 | CDV3       | -1.8393821 | 0.01912849 |
| ENSG00000124688 | MAD2L1BP   | -1.8379636 | 0.01436972 |
| ENSG00000232956 | SNHG15     | -1.8378725 | 0.02908505 |
| ENSG00000156502 | SUPV3L1    | -1.8376414 | 0.02406189 |
| ENSG0000008056  | SYN1       | -1.8369916 | 0.03260989 |
| ENSG00000111328 | CDK2AP1    | -1.8365447 | 0.00470819 |
| ENSG00000181555 | SETD2      | -1.8349682 | 0.01078639 |
| ENSG00000121741 | ZMYM2      | -1.8347027 | 0.00475524 |
| ENSG00000070756 | PABPC1     | -1.83213   | 0.01041945 |
| ENSG00000280138 | AC027290.2 | -1.8290481 | 0.0091546  |
| ENSG00000105849 | TWISTNB    | -1.8270408 | 0.01340294 |
| ENSG00000143702 | CEP170     | -1.8267153 | 0.0250423  |
| ENSG00000067082 | KLF6       | -1.8252776 | 0.0003396  |
| ENSG00000150787 | PTS        | -1.8239395 | 0.02885702 |
| ENSG00000111615 | KRR1       | -1.8237644 | 0.00277722 |
| ENSG00000149658 | YTHDF1     | -1.8222774 | 0.00068553 |
| ENSG00000106546 | AHR        | -1.8195494 | 0.00370312 |
| ENSG00000119977 | TCTN3      | -1.8157545 | 0.00888906 |
| ENSG00000145779 | TNFAIP8    | -1.8131266 | 0.0141295  |
| ENSG00000170540 | ARL6IP1    | -1.8129335 | 0.00340571 |
| ENSG00000143514 | TP53BP2    | -1.8100934 | 0.01342164 |
| ENSG00000153201 | RANBP2     | -1.8072062 | 0.02608793 |
| ENSG00000133134 | BEX2       | -1.806631  | 0.0196015  |
| ENSG00000166225 | FRS2       | -1.8065146 | 0.00647532 |
| ENSG00000133112 | TPT1       | -1.8063189 | 0.00132049 |
| ENSG00000106615 | RHEB       | -1.8038768 | 0.00837266 |
| ENSG00000106346 | USP42      | -1.8019186 | 0.00190335 |
| ENSG00000116560 | SFPQ       | -1.7994113 | 0.00068553 |
| ENSG00000124226 | RNF114     | -1.7993923 | 0.00073864 |
| ENSG00000109670 | FBXW7      | -1.7973337 | 0.00854947 |
| ENSG00000004897 | CDC27      | -1.7965648 | 0.00261709 |
| ENSG00000114013 | CD86       | -1.7955992 | 0.01681053 |
| ENSG00000185862 | EVI2B      | -1.7937298 | 0.00456187 |

|                 |            |            |            |
|-----------------|------------|------------|------------|
| ENSG00000164758 | MED30      | -1.7926099 | 0.00068553 |
| ENSG00000196233 | LCOR       | -1.7918862 | 0.00394084 |
| ENSG00000076053 | RBM7       | -1.790178  | 0.00425431 |
| ENSG00000280254 | AC233723.2 | -1.7897342 | 0.02069455 |
| ENSG00000177733 | HNRNPA0    | -1.7892427 | 0.01337033 |
| ENSG00000169826 | CSGALNACT2 | -1.7868556 | 0.0020197  |
| ENSG00000196850 | PPTC7      | -1.7814752 | 0.00205451 |
| ENSG00000108960 | MMD        | -1.7806926 | 0.00622658 |
| ENSG00000114126 | TFDP2      | -1.780669  | 0.00340571 |
| ENSG00000163605 | PPP4R2     | -1.7794263 | 0.00328847 |
| ENSG00000111711 | GOLT1B     | -1.7781447 | 0.00057232 |
| ENSG00000160218 | TRAPPC10   | -1.7731389 | 0.01579272 |
| ENSG00000163682 | RPL9       | -1.770584  | 0.01545309 |
| ENSG00000116030 | SUMO1      | -1.7704237 | 0.00175493 |
| ENSG00000120727 | PAIP2      | -1.7686695 | 6.3344E-05 |
| ENSG00000170881 | RNF139     | -1.7631297 | 0.03231104 |
| ENSG00000103978 | TMEM87A    | -1.7616235 | 0.01498914 |
| ENSG00000105851 | PIK3CG     | -1.7614506 | 0.0083323  |
| ENSG00000163788 | SNRK       | -1.7602372 | 0.00272216 |
| ENSG00000110848 | CD69       | -1.7598275 | 0.02816883 |
| ENSG00000124145 | SDC4       | -1.7572618 | 0.00478686 |
| ENSG00000135241 | PNPLA8     | -1.7567401 | 0.01448055 |
| ENSG00000150977 | RILPL2     | -1.7559385 | 0.03826914 |
| ENSG00000168066 | SF1        | -1.7517346 | 0.04243611 |
| ENSG00000055208 | TAB2       | -1.7516409 | 0.02673165 |
| ENSG00000116752 | BCAS2      | -1.7512089 | 0.00270338 |
| ENSG00000105993 | DNAJB6     | -1.7510581 | 0.0028536  |
| ENSG00000150907 | FOXO1      | -1.7504125 | 0.0426935  |
| ENSG00000172062 | SMN1       | -1.747204  | 0.01832629 |
| ENSG00000204178 | TMEM57     | -1.7452922 | 0.00355307 |
| ENSG00000269968 | AC006064.4 | -1.7450836 | 0.01134212 |
| ENSG00000213079 | SCAF8      | -1.7440465 | 0.00647382 |
| ENSG00000267165 | CHMP1B-AS1 | -1.7402032 | 0.0076333  |
| ENSG00000029993 | HMGB3      | -1.73794   | 0.01056441 |
| ENSG00000133606 | MKRN1      | -1.7369882 | 0.00251682 |
| ENSG00000139505 | MTMR6      | -1.7359162 | 0.00753737 |
| ENSG00000023287 | RB1CC1     | -1.735826  | 0.00898743 |
| ENSG00000115956 | PLEK       | -1.735279  | 0.02325376 |
| ENSG00000136826 | KLF4       | -1.734594  | 0.01122844 |
| ENSG00000168883 | USP39      | -1.7340665 | 0.00244907 |
| ENSG00000089818 | NECAP1     | -1.7339017 | 0.00474195 |
| ENSG00000099985 | OSM        | -1.7300245 | 0.01313513 |

|                 |           |            |            |
|-----------------|-----------|------------|------------|
| ENSG00000134352 | IL6ST     | -1.7297119 | 0.00557216 |
| ENSG00000054967 | RELT      | -1.7292776 | 0.00985902 |
| ENSG00000165782 | PIP4P1    | -1.7284522 | 0.02069455 |
| ENSG00000048405 | ZNF800    | -1.7253481 | 0.00068553 |
| ENSG00000153914 | SREK1     | -1.724517  | 0.00758153 |
| ENSG00000160741 | CRTC2     | -1.7237738 | 0.0356038  |
| ENSG00000153922 | CHD1      | -1.7229725 | 0.00075186 |
| ENSG00000147604 | RPL7      | -1.7216834 | 0.00328847 |
| ENSG00000089234 | BRAP      | -1.721121  | 0.00415779 |
| ENSG00000204977 | TRIM13    | -1.7191353 | 0.00087585 |
| ENSG00000144597 | EAF1      | -1.7172654 | 0.00292472 |
| ENSG00000155508 | CNOT8     | -1.7169155 | 0.01661933 |
| ENSG00000109113 | RAB34     | -1.714764  | 0.00170624 |
| ENSG00000162783 | IER5      | -1.7133399 | 0.0032195  |
| ENSG00000121797 | CCRL2     | -1.7130671 | 0.00303209 |
| ENSG00000205937 | RNPS1     | -1.7113322 | 0.0052756  |
| ENSG00000132334 | PTPRE     | -1.7103155 | 0.03823029 |
| ENSG00000169612 | FAM103A1  | -1.7100605 | 0.00327181 |
| ENSG00000114942 | EEF1B2    | -1.7078588 | 0.00398077 |
| ENSG00000089157 | RPLP0     | -1.7073876 | 0.00803214 |
| ENSG00000168092 | PAFAH1B2  | -1.7068097 | 0.00251682 |
| ENSG00000143774 | GUK1      | -1.7052018 | 0.0160308  |
| ENSG00000111647 | UHRF1BP1L | -1.7049002 | 0.00096838 |
| ENSG00000137714 | FDX1      | -1.7047534 | 0.00152415 |
| ENSG00000147403 | RPL10     | -1.7040316 | 0.0012446  |
| ENSG00000125651 | GTF2F1    | -1.7027506 | 0.00178606 |
| ENSG00000140299 | BNIP2     | -1.7020802 | 0.00112968 |
| ENSG00000107341 | UBE2R2    | -1.7018502 | 0.01041945 |
| ENSG00000006634 | DBF4      | -1.6999703 | 0.00251622 |
| ENSG00000124201 | ZNFX1     | -1.6994888 | 0.00516637 |
| ENSG00000065978 | YBX1      | -1.6982792 | 0.00985902 |
| ENSG00000067334 | DNTTIP2   | -1.6982219 | 0.01380074 |
| ENSG00000140455 | USP3      | -1.6974653 | 0.04122249 |
| ENSG00000167004 | PDIA3     | -1.697063  | 0.00356514 |
| ENSG00000266094 | RASSF5    | -1.6924631 | 0.0089013  |
| ENSG00000119048 | UBE2B     | -1.6916263 | 0.0013773  |
| ENSG00000070831 | CDC42     | -1.6915173 | 0.00151997 |
| ENSG00000136802 | LRRC8A    | -1.6901455 | 0.0114427  |
| ENSG00000102753 | KPNA3     | -1.6888021 | 0.00088963 |
| ENSG00000122482 | ZNF644    | -1.6876147 | 0.01319879 |
| ENSG00000065548 | ZC3H15    | -1.6864485 | 0.0069367  |
| ENSG00000182899 | RPL35A    | -1.6862025 | 0.00217078 |

|                 |          |            |            |
|-----------------|----------|------------|------------|
| ENSG00000104765 | BNIP3L   | -1.684738  | 0.00647532 |
| ENSG00000183876 | ARSI     | -1.6839177 | 0.01520729 |
| ENSG00000173020 | GRK2     | -1.683088  | 0.00473792 |
| ENSG00000136807 | CDK9     | -1.6816099 | 0.01764539 |
| ENSG00000179361 | ARID3B   | -1.6809762 | 0.00476653 |
| ENSG00000114125 | RNF7     | -1.6808329 | 0.00599034 |
| ENSG00000162910 | MRPL55   | -1.6802915 | 0.04284787 |
| ENSG00000156650 | KAT6B    | -1.6791182 | 0.00085958 |
| ENSG00000141753 | IGFBP4   | -1.6786195 | 0.03066234 |
| ENSG00000152056 | AP1S3    | -1.6784011 | 0.04880748 |
| ENSG00000110367 | DDX6     | -1.6782528 | 0.00345296 |
| ENSG00000108175 | ZMIZ1    | -1.676447  | 0.00843969 |
| ENSG00000197021 | CXorf40B | -1.6763325 | 0.00897301 |
| ENSG00000168209 | DDIT4    | -1.6762806 | 0.00955337 |
| ENSG00000149806 | FAU      | -1.6757868 | 0.0029323  |
| ENSG00000163125 | RPRD2    | -1.6743337 | 0.01278329 |
| ENSG00000241839 | PLEKHO2  | -1.6742498 | 0.00152415 |
| ENSG00000205189 | ZBTB10   | -1.6738141 | 0.00605285 |
| ENSG00000163694 | RBM47    | -1.6728334 | 0.00362829 |
| ENSG00000111640 | GAPDH    | -1.6727812 | 0.00278533 |
| ENSG00000170185 | USP38    | -1.67206   | 0.00898494 |
| ENSG00000122026 | RPL21    | -1.6702654 | 0.00373954 |
| ENSG00000165006 | UBAP1    | -1.669239  | 0.01424953 |
| ENSG00000197063 | MAFG     | -1.6665465 | 0.00358122 |
| ENSG00000105821 | DNAJC2   | -1.6665112 | 0.01220964 |
| ENSG00000176624 | MEX3C    | -1.6639347 | 0.00365743 |
| ENSG00000179119 | SPTY2D1  | -1.6635058 | 0.02607218 |
| ENSG00000157540 | DYRK1A   | -1.661791  | 0.0124965  |
| ENSG00000089737 | DDX24    | -1.6611366 | 0.00482535 |
| ENSG00000084463 | WBP11    | -1.6609711 | 0.00066481 |
| ENSG00000165527 | ARF6     | -1.6604177 | 0.00847993 |
| ENSG00000082515 | MRPL22   | -1.657823  | 0.00543849 |
| ENSG00000130803 | ZNF317   | -1.6575024 | 0.00155933 |
| ENSG00000138433 | CIR1     | -1.6543325 | 0.00992425 |
| ENSG00000172766 | NAA16    | -1.6542532 | 0.01220964 |
| ENSG00000198612 | COPS8    | -1.652776  | 0.02661358 |
| ENSG00000172239 | PAIP1    | -1.649347  | 0.00383452 |
| ENSG00000163660 | CCNL1    | -1.6462447 | 0.02582355 |
| ENSG00000188994 | ZNF292   | -1.6460525 | 0.04161115 |
| ENSG00000129484 | PARP2    | -1.6455113 | 0.00479604 |
| ENSG00000148344 | PTGES    | -1.6441474 | 0.00795236 |
| ENSG00000091164 | TXNL1    | -1.6430885 | 0.02273887 |



|                 |            |            |            |
|-----------------|------------|------------|------------|
| ENSG00000185883 | ATP6V0C    | -1.6425553 | 0.04974898 |
| ENSG00000089693 | MLF2       | -1.6419361 | 0.0015584  |
| ENSG00000278311 | GGNBP2     | -1.6397228 | 0.01062296 |
| ENSG00000188229 | TUBB4B     | -1.6380862 | 0.01331674 |
| ENSG00000101247 | NDUF5A5    | -1.637469  | 0.007107   |
| ENSG00000185043 | CIB1       | -1.6365419 | 0.0034608  |
| ENSG00000187109 | NAP1L1     | -1.6353027 | 0.00664721 |
| ENSG00000112031 | MTRF1L     | -1.6344423 | 0.00174835 |
| ENSG00000196235 | SUPT5H     | -1.6337015 | 0.01375455 |
| ENSG00000145425 | RPS3A      | -1.6335388 | 0.00437009 |
| ENSG00000106608 | URGCP      | -1.6330278 | 0.00151997 |
| ENSG00000115339 | GALNT3     | -1.6320953 | 0.00803214 |
| ENSG00000177374 | HIC1       | -1.630597  | 0.02117842 |
| ENSG00000137818 | RPLP1      | -1.6292029 | 0.0028804  |
| ENSG00000113615 | SEC24A     | -1.6286771 | 0.02259519 |
| ENSG00000022840 | RNF10      | -1.6246667 | 0.00643481 |
| ENSG00000153561 | RMND5A     | -1.6235615 | 0.00261709 |
| ENSG00000119725 | ZNF410     | -1.6234925 | 0.01184035 |
| ENSG00000137154 | RPS6       | -1.6228355 | 0.00456305 |
| ENSG00000128524 | ATP6V1F    | -1.62182   | 0.00085232 |
| ENSG00000177879 | AP3S1      | -1.6213965 | 0.0254258  |
| ENSG00000071462 | BUD23      | -1.6206945 | 0.0150404  |
| ENSG00000156482 | RPL30      | -1.6202439 | 0.00454367 |
| ENSG00000163041 | H3F3A      | -1.6200579 | 0.00641944 |
| ENSG00000181467 | RAP2B      | -1.6196627 | 0.0173468  |
| ENSG00000080546 | SESN1      | -1.6188649 | 0.02271425 |
| ENSG00000130734 | ATG4D      | -1.6179839 | 0.00089939 |
| ENSG00000099968 | BCL2L13    | -1.6155117 | 0.01939163 |
| ENSG00000134453 | RBM17      | -1.6148427 | 0.00267271 |
| ENSG00000138032 | PPM1B      | -1.6147717 | 0.02622642 |
| ENSG00000198431 | TXNRD1     | -1.6147491 | 0.00264376 |
| ENSG00000144713 | RPL32      | -1.614093  | 0.00472286 |
| ENSG00000225648 | SBDSP1     | -1.6135219 | 0.00088661 |
| ENSG00000272379 | AL008729.2 | -1.612116  | 0.00375779 |
| ENSG00000124209 | RAB22A     | -1.612076  | 0.02643206 |
| ENSG00000100083 | GGA1       | -1.6112479 | 0.00467105 |
| ENSG00000008952 | SEC62      | -1.6097533 | 0.00174835 |
| ENSG00000100316 | RPL3       | -1.6091778 | 0.00215171 |
| ENSG00000255198 | SNHG9      | -1.6058942 | 0.00398077 |
| ENSG00000094975 | SUCO       | -1.6049018 | 0.01955516 |
| ENSG00000184014 | DENND5A    | -1.6044952 | 0.03763219 |
| ENSG00000143771 | CNIH4      | -1.6030478 | 0.02227966 |

|                 |          |            |            |
|-----------------|----------|------------|------------|
| ENSG00000095574 | IKZF5    | -1.6022235 | 0.00553015 |
| ENSG00000113580 | NR3C1    | -1.601731  | 0.00098422 |
| ENSG00000009307 | CSDE1    | -1.6014377 | 0.00136992 |
| ENSG00000179456 | ZBTB18   | -1.6012679 | 0.01112659 |
| ENSG00000112033 | PPARD    | -1.5986873 | 0.0494711  |
| ENSG00000181220 | ZNF746   | -1.5982507 | 0.00606651 |
| ENSG00000172071 | EIF2AK3  | -1.5962497 | 0.01874206 |
| ENSG00000124575 | HIST1H1D | -1.5959148 | 0.04985787 |
| ENSG00000109475 | RPL34    | -1.5953481 | 0.00581898 |
| ENSG00000148572 | NRBF2    | -1.5924814 | 0.01118305 |
| ENSG00000147526 | TACC1    | -1.5924675 | 0.02927448 |
| ENSG00000156508 | EEF1A1   | -1.5924164 | 0.00690199 |
| ENSG00000178623 | GPR35    | -1.5917165 | 0.03932732 |
| ENSG00000134153 | EMC7     | -1.5912327 | 0.00230358 |
| ENSG00000162928 | PEX13    | -1.5910762 | 0.00068553 |
| ENSG00000124198 | ARFGEF2  | -1.5903358 | 0.02438605 |
| ENSG00000142534 | RPS11    | -1.5880777 | 0.00479775 |
| ENSG00000174437 | ATP2A2   | -1.5879063 | 0.00895721 |
| ENSG00000184203 | PPP1R2   | -1.5867929 | 0.00112968 |
| ENSG00000175390 | EIF3F    | -1.5859656 | 0.00261709 |
| ENSG00000176142 | TMEM39A  | -1.585872  | 0.00174835 |
| ENSG00000197019 | SERTAD1  | -1.5846568 | 0.00131723 |
| ENSG00000135269 | TES      | -1.5840686 | 0.00478686 |
| ENSG00000198369 | SPRED2   | -1.5840124 | 0.02118998 |
| ENSG00000139697 | SBNO1    | -1.583608  | 0.0052464  |
| ENSG00000083896 | YTHDC1   | -1.5835034 | 0.00816851 |
| ENSG00000188846 | RPL14    | -1.5809511 | 0.00131723 |
| ENSG00000148926 | ADM      | -1.5806023 | 0.00115627 |
| ENSG00000129351 | ILF3     | -1.5801779 | 0.04150351 |
| ENSG00000123066 | MED13L   | -1.5795238 | 0.01554896 |
| ENSG00000125633 | CCDC93   | -1.5790041 | 0.02193221 |
| ENSG00000119682 | AREL1    | -1.5788068 | 0.02024358 |
| ENSG00000173960 | UBXN2A   | -1.5769502 | 0.0077505  |
| ENSG00000140988 | RPS2     | -1.5765242 | 0.00180611 |
| ENSG00000069399 | BCL3     | -1.5752995 | 0.0040364  |
| ENSG00000172216 | CEBPB    | -1.5741391 | 0.03113618 |
| ENSG00000198355 | PIM3     | -1.5733536 | 0.00854947 |
| ENSG00000123728 | RAP2C    | -1.5728618 | 0.00188356 |
| ENSG00000071082 | RPL31    | -1.5715256 | 0.00356514 |
| ENSG00000125835 | SNRPB    | -1.5710062 | 0.00584684 |
| ENSG00000168298 | HIST1H1E | -1.5709735 | 0.03816405 |
| ENSG00000086598 | TMED2    | -1.5708252 | 0.00433347 |

|                 |          |            |            |
|-----------------|----------|------------|------------|
| ENSG00000117155 | SSX2IP   | -1.5701526 | 0.00746441 |
| ENSG00000156735 | BAG4     | -1.5699471 | 0.02812648 |
| ENSG00000169100 | SLC25A6  | -1.5696587 | 0.00084979 |
| ENSG00000177954 | RPS27    | -1.5682295 | 0.00536505 |
| ENSG00000167173 | C15orf39 | -1.5673275 | 0.00145819 |
| ENSG00000148154 | UGCG     | -1.5669782 | 0.01115489 |
| ENSG00000115806 | GORASP2  | -1.5656612 | 0.00533443 |
| ENSG00000175348 | TMEM9B   | -1.5653281 | 0.00068553 |
| ENSG00000104388 | RAB2A    | -1.5634659 | 0.00454367 |
| ENSG00000112312 | GMNN     | -1.5628654 | 0.04916348 |
| ENSG00000143256 | PFDN2    | -1.5606849 | 0.01221599 |
| ENSG00000146676 | PURB     | -1.5606155 | 0.03868251 |
| ENSG00000135956 | TMEM127  | -1.5603145 | 0.01043618 |
| ENSG00000173846 | PLK3     | -1.559521  | 0.00138775 |
| ENSG00000115540 | MOB4     | -1.5589761 | 0.00261709 |
| ENSG00000101084 | C20orf24 | -1.5589552 | 0.0078963  |
| ENSG00000113013 | HSPA9    | -1.5586943 | 0.00945729 |
| ENSG00000171863 | RPS7     | -1.558037  | 0.00898494 |
| ENSG00000058729 | RIOK2    | -1.5579677 | 0.02601539 |
| ENSG00000173726 | TOMM20   | -1.5566251 | 0.00752548 |
| ENSG00000188647 | PTAR1    | -1.5561199 | 0.01520729 |
| ENSG00000169567 | HINT1    | -1.5556169 | 0.00073864 |
| ENSG00000142227 | EMP3     | -1.5538489 | 0.00110322 |
| ENSG00000135486 | HNRNPA1  | -1.5535808 | 0.00068553 |
| ENSG00000265681 | RPL17    | -1.5528705 | 0.00084979 |
| ENSG00000231500 | RPS18    | -1.5528442 | 0.00803214 |
| ENSG00000111897 | SERINC1  | -1.5522296 | 0.00419863 |
| ENSG00000161526 | SAP30BP  | -1.5518241 | 0.00669784 |
| ENSG00000166747 | AP1G1    | -1.550922  | 0.0048531  |
| ENSG00000132155 | RAF1     | -1.5505873 | 0.00977231 |
| ENSG00000186468 | RPS23    | -1.5496541 | 0.00384737 |
| ENSG00000134108 | ARL8B    | -1.5491257 | 0.01646059 |
| ENSG00000059728 | MXD1     | -1.5487421 | 0.03200845 |
| ENSG00000164587 | RPS14    | -1.5477543 | 0.01154483 |
| ENSG00000026508 | CD44     | -1.5456982 | 0.0344454  |
| ENSG00000243147 | MRPL33   | -1.545268  | 0.00340571 |
| ENSG00000132510 | KDM6B    | -1.544837  | 0.00655725 |
| ENSG00000137393 | RNF144B  | -1.5439776 | 0.04668784 |
| ENSG00000112137 | PHACTR1  | -1.5429751 | 0.00174835 |
| ENSG00000167526 | RPL13    | -1.5426482 | 0.0010458  |
| ENSG00000182827 | ACBD3    | -1.5424162 | 0.00211387 |
| ENSG00000152700 | SAR1B    | -1.5422892 | 0.00107147 |

|                 |                    |            |            |
|-----------------|--------------------|------------|------------|
| ENSG00000087460 | GNAS               | -1.5407708 | 0.00266233 |
| ENSG00000165637 | VDAC2              | -1.5403825 | 0.00760268 |
| ENSG00000137815 | RTF1               | -1.540021  | 0.01007801 |
| ENSG00000115128 | SF3B6              | -1.5393517 | 0.00553015 |
| ENSG00000101367 | MAPRE1             | -1.5383761 | 0.01752544 |
| ENSG00000197958 | RPL12              | -1.5382434 | 0.0024099  |
| ENSG00000104626 | ERI1               | -1.5379124 | 0.04510053 |
| ENSG00000104267 | CA2                | -1.5370192 | 0.01999961 |
| ENSG00000198925 | ATG9A              | -1.5357    | 0.01311257 |
| ENSG00000147677 | EIF3H              | -1.5353354 | 0.00085958 |
| ENSG00000241343 | RPL36A             | -1.5333985 | 0.00294771 |
| ENSG00000145592 | RPL37              | -1.5323838 | 0.00478686 |
| ENSG00000117614 | SYF2               | -1.5302778 | 0.00333758 |
| ENSG00000036257 | CUL3               | -1.5298442 | 0.00194739 |
| ENSG00000047634 | SCML1              | -1.5298198 | 0.02908495 |
| ENSG00000141030 | COPS3              | -1.5291822 | 0.00261709 |
| ENSG00000138231 | DBR1               | -1.5291675 | 0.00094075 |
| ENSG00000054523 | KIF1B              | -1.5285471 | 0.0467038  |
| ENSG00000112242 | E2F3               | -1.5285201 | 0.00540721 |
| ENSG00000071243 | ING3               | -1.5273524 | 0.00428193 |
| ENSG00000124214 | STAU1              | -1.5271249 | 0.00138775 |
| ENSG00000171222 | SCAND1             | -1.5258209 | 0.0029729  |
| ENSG00000072364 | AFF4               | -1.5256164 | 0.00115627 |
| ENSG00000215472 | RPL17-<br>C18orf32 | -1.5251675 | 0.00778627 |
| ENSG00000169018 | FEM1B              | -1.5250244 | 0.02583179 |
| ENSG00000100997 | ABHD12             | -1.52373   | 0.00200912 |
| ENSG00000165312 | OTUD1              | -1.5229335 | 0.01913591 |
| ENSG00000198918 | RPL39              | -1.5211883 | 0.0078963  |
| ENSG00000162702 | ZNF281             | -1.520689  | 0.01220964 |
| ENSG00000008405 | CRY1               | -1.5205039 | 0.01220964 |
| ENSG00000139433 | GLTP               | -1.5192312 | 0.00458456 |
| ENSG00000254772 | EEF1G              | -1.5186586 | 0.00312423 |
| ENSG00000123595 | RAB9A              | -1.5186059 | 0.01342519 |
| ENSG00000128016 | ZFP36              | -1.5183352 | 0.00098988 |
| ENSG00000177600 | RPLP2              | -1.5180062 | 0.0027444  |
| ENSG00000094841 | UPRT               | -1.5163391 | 0.01368036 |
| ENSG00000015479 | MATR3              | -1.5153627 | 0.00107181 |
| ENSG00000242125 | SNHG3              | -1.5130102 | 0.00155927 |
| ENSG00000141428 | C18orf21           | -1.5124046 | 0.01076323 |
| ENSG00000055211 | GINM1              | -1.5119738 | 0.01087427 |
| ENSG00000175061 | LRRC75A-AS1        | -1.5090321 | 0.00774986 |

|                 |         |            |            |
|-----------------|---------|------------|------------|
| ENSG00000198160 | MIER1   | -1.5086014 | 0.00250324 |
| ENSG00000155545 | MIER3   | -1.5083991 | 0.02110531 |
| ENSG00000185359 | HGS     | -1.5074004 | 0.014456   |
| ENSG00000198242 | RPL23A  | -1.5067581 | 0.00183922 |
| ENSG00000198755 | RPL10A  | -1.5053093 | 0.01354723 |
| ENSG00000142541 | RPL13A  | -1.5037966 | 0.00599034 |
| ENSG00000137770 | CTDSPL2 | -1.5035044 | 0.00973379 |
| ENSG00000101146 | RAE1    | -1.5029774 | 0.00898743 |
| ENSG00000170779 | CDCA4   | -1.5020035 | 0.02440814 |
| ENSG00000111666 | CHPT1   | -1.50194   | 0.00232828 |
| ENSG00000099381 | SETD1A  | -1.5018804 | 0.00454404 |

## DEG CD141+ cDCs pSS versus HD

| <b>Transcript ID</b> | <b>Gene name</b> | <b>Log2(FC)</b> | <b>FDR &lt; 0.05</b> |
|----------------------|------------------|-----------------|----------------------|
| ENSG00000110876      | SELPLG           | 3.82802031      | 0.01263788           |
| ENSG00000005020      | SKAP2            | 3.68966628      | 0.01433947           |
| ENSG00000132530      | XAF1             | 3.60076426      | 0.01959496           |
| ENSG00000101347      | SAMHD1           | 3.54846982      | 0.00530244           |
| ENSG00000197713      | RPE              | 3.49566248      | 0.00231608           |
| ENSG00000196975      | ANXA4            | 3.44180679      | 0.00373194           |
| ENSG00000163683      | SMIM14           | 3.41399309      | 0.00329769           |
| ENSG00000240065      | PSMB9            | 3.34825852      | 0.00771252           |
| ENSG00000177409      | SAMD9L           | 3.34415245      | 0.04700928           |
| ENSG00000151702      | FLI1             | 3.26794279      | 0.0071252            |
| ENSG00000088986      | DYNLL1           | 3.20207297      | 0.00718932           |
| ENSG00000197142      | ACSL5            | 3.18105019      | 0.01686697           |
| ENSG00000131203      | IDO1             | 3.17237199      | 0.04053815           |
| ENSG00000131844      | MCCC2            | 3.08943003      | 0.00809412           |
| ENSG00000117676      | RPS6KA1          | 3.08369812      | 0.00373378           |
| ENSG00000178927      | C17orf62         | 3.01908121      | 0.00231608           |
| ENSG00000178175      | ZNF366           | 3.00669325      | 0.01156951           |
| ENSG00000175567      | UCP2             | 2.97576587      | 0.00942001           |
| ENSG00000167797      | CDK2AP2          | 2.97169671      | 0.00695581           |
| ENSG00000092964      | DPYSL2           | 2.9662081       | 0.01733544           |
| ENSG00000133835      | HSD17B4          | 2.95560908      | 0.00373194           |
| ENSG00000004455      | AK2              | 2.88436107      | 0.00450671           |
| ENSG00000184432      | COPB2            | 2.85168951      | 0.00373194           |
| ENSG00000073849      | ST6GAL1          | 2.84253331      | 0.04936695           |
| ENSG00000108946      | PRKAR1A          | 2.82726055      | 0.00785938           |
| ENSG00000157601      | MX1              | 2.81221268      | 0.00643515           |
| ENSG00000117054      | ACADM            | 2.8098934       | 0.01038122           |
| ENSG00000133943      | DGLUCY           | 2.80765017      | 0.00939014           |
| ENSG00000111335      | OAS2             | 2.79151142      | 0.02409658           |
| ENSG00000118855      | MFSD1            | 2.77966236      | 0.00231608           |
| ENSG00000111913      | RIPOR2           | 2.77926568      | 0.0164224            |
| ENSG00000188404      | SELL             | 2.7711235       | 0.00683094           |
| ENSG00000112118      | MCM3             | 2.75448581      | 0.04775931           |
| ENSG00000127951      | FGL2             | 2.70464858      | 0.00471655           |
| ENSG00000165672      | PRDX3            | 2.68982116      | 0.018607             |
| ENSG00000136518      | ACTL6A           | 2.6770965       | 0.03205559           |

|                 |          |            |            |
|-----------------|----------|------------|------------|
| ENSG00000133106 | EPSTI1   | 2.6728163  | 0.00427995 |
| ENSG00000143390 | RFX5     | 2.64713348 | 0.00411253 |
| ENSG00000103381 | CPPED1   | 2.64591863 | 0.02817193 |
| ENSG00000116455 | WDR77    | 2.62619068 | 0.00939014 |
| ENSG00000113845 | TIMMDC1  | 2.61924211 | 0.00498634 |
| ENSG00000170581 | STAT2    | 2.61603253 | 0.01890536 |
| ENSG00000217555 | CKLF     | 2.61565748 | 0.01017501 |
| ENSG00000138459 | SLC35A5  | 2.61037387 | 0.00574457 |
| ENSG00000093072 | ADA2     | 2.61031333 | 0.01118101 |
| ENSG00000105483 | CARD8    | 2.58053041 | 0.00366462 |
| ENSG00000146192 | FGD2     | 2.57459956 | 0.03185424 |
| ENSG00000214114 | MYCBP    | 2.54384693 | 0.0123091  |
| ENSG00000111481 | COPZ1    | 2.53491668 | 0.00092215 |
| ENSG00000103018 | CYB5B    | 2.53412838 | 0.03940052 |
| ENSG00000115415 | STAT1    | 2.51436658 | 0.00714668 |
| ENSG00000103423 | DNAJA3   | 2.48171181 | 0.00369871 |
| ENSG00000133739 | LRRCC1   | 2.47022279 | 0.00427995 |
| ENSG00000058668 | ATP2B4   | 2.46603127 | 0.01140717 |
| ENSG00000136631 | VPS45    | 2.4455971  | 0.00669336 |
| ENSG00000101336 | HCK      | 2.43572212 | 0.00414186 |
| ENSG00000165934 | CPSF2    | 2.42895524 | 0.02319321 |
| ENSG00000166801 | FAM111A  | 2.42695116 | 0.04149208 |
| ENSG00000170854 | RIOX2    | 2.42306435 | 0.01017501 |
| ENSG00000082074 | FYB1     | 2.40640034 | 0.01889942 |
| ENSG00000166002 | SMCO4    | 2.39157552 | 0.02742631 |
| ENSG00000174123 | TLR10    | 2.39131619 | 0.01831296 |
| ENSG00000197471 | SPN      | 2.38349931 | 0.01377676 |
| ENSG00000132256 | TRIM5    | 2.37573124 | 0.02259125 |
| ENSG00000174500 | GCSAM    | 2.36971573 | 0.02056281 |
| ENSG00000162736 | NCSTN    | 2.36845665 | 0.01972577 |
| ENSG00000155097 | ATP6V1C1 | 2.36729947 | 0.04652814 |
| ENSG00000183486 | MX2      | 2.3666934  | 0.00366462 |
| ENSG00000181192 | DHTKD1   | 2.36357046 | 0.00643515 |
| ENSG00000154511 | FAM69A   | 2.35841198 | 0.02481535 |
| ENSG00000113522 | RAD50    | 2.35497808 | 0.00375346 |
| ENSG00000109684 | CLNK     | 2.34232203 | 0.01516728 |
| ENSG00000107551 | RASSF4   | 2.33187847 | 0.02021428 |
| ENSG00000161929 | SCIMP    | 2.32602311 | 0.01801069 |
| ENSG00000133706 | LARS     | 2.32397223 | 0.00643515 |
| ENSG00000145781 | COMMD10  | 2.32140285 | 0.02056247 |

|                 |          |            |            |
|-----------------|----------|------------|------------|
| ENSG00000188554 | NBR1     | 2.31683543 | 0.02110815 |
| ENSG00000134910 | STT3A    | 2.31416843 | 0.03073439 |
| ENSG00000197043 | ANXA6    | 2.30138687 | 0.01333465 |
| ENSG00000100442 | FKBP3    | 2.30137712 | 0.03950432 |
| ENSG00000198951 | NAGA     | 2.30017514 | 0.01778545 |
| ENSG00000178537 | SLC25A20 | 2.29976075 | 0.00683094 |
| ENSG00000145907 | G3BP1    | 2.28657148 | 0.00366462 |
| ENSG00000159131 | GART     | 2.27895148 | 0.02160911 |
| ENSG00000137513 | NARS2    | 2.27413426 | 0.0164287  |
| ENSG00000102699 | PARP4    | 2.26160551 | 0.02565202 |
| ENSG00000108798 | ABI3     | 2.26085742 | 0.0417526  |
| ENSG00000093144 | ECHDC1   | 2.25935241 | 0.01346053 |
| ENSG00000166797 | FAM96A   | 2.25395611 | 0.01382958 |
| ENSG00000028528 | SNX1     | 2.2481123  | 0.00366462 |
| ENSG00000138073 | PREB     | 2.23899359 | 0.00427995 |
| ENSG00000196511 | TPK1     | 2.23484766 | 0.00853143 |
| ENSG00000145982 | FARS2    | 2.23187495 | 0.01599822 |
| ENSG00000197943 | PLCG2    | 2.2254161  | 0.01382958 |
| ENSG00000169220 | RGS14    | 2.22529372 | 0.00471655 |
| ENSG00000143252 | SDHC     | 2.22432491 | 0.00369871 |
| ENSG00000168310 | IRF2     | 2.21941679 | 0.01142001 |
| ENSG00000138185 | ENTPD1   | 2.21332138 | 0.01889942 |
| ENSG00000115204 | MPV17    | 2.21312672 | 0.00910123 |
| ENSG00000258659 | TRIM34   | 2.20303708 | 0.02833544 |
| ENSG00000136100 | VPS36    | 2.20130245 | 0.04311957 |
| ENSG00000068079 | IFI35    | 2.20055085 | 0.00471655 |
| ENSG00000028116 | VRK2     | 2.19526545 | 0.00366462 |
| ENSG00000138660 | AP1AR    | 2.18304632 | 0.02083863 |
| ENSG00000136279 | DBNL     | 2.1820547  | 0.00897674 |
| ENSG00000103051 | COG4     | 2.18108613 | 0.01480602 |
| ENSG00000175792 | RUVBL1   | 2.18096182 | 0.01382958 |
| ENSG00000170915 | PAQR8    | 2.17855823 | 0.03259356 |
| ENSG00000159228 | CBR1     | 2.17642933 | 0.01778545 |
| ENSG00000198771 | RCSD1    | 2.15975098 | 0.03365728 |
| ENSG00000065413 | ANKRD44  | 2.14995458 | 0.00414186 |
| ENSG00000137509 | PRCP     | 2.14767494 | 0.02417588 |
| ENSG00000180353 | HCLS1    | 2.14375858 | 0.00795821 |
| ENSG00000140968 | IRF8     | 2.1415942  | 0.01040756 |
| ENSG00000110063 | DCPS     | 2.13097937 | 0.01065996 |
| ENSG00000134152 | KATNBL1  | 2.12442073 | 0.002059   |



|                 |          |            |            |
|-----------------|----------|------------|------------|
| ENSG0000026751  | SLAMF7   | 2.122695   | 0.00414186 |
| ENSG00000128513 | POT1     | 2.11684276 | 0.03724185 |
| ENSG00000153064 | BANK1    | 2.11592711 | 0.01948002 |
| ENSG00000166326 | TRIM44   | 2.10872196 | 0.03214462 |
| ENSG00000176087 | SLC35A4  | 2.10613373 | 0.00783832 |
| ENSG00000159063 | ALG8     | 2.09621344 | 0.00772963 |
| ENSG00000072501 | SMC1A    | 2.0873365  | 0.00388963 |
| ENSG00000130021 | PUDP     | 2.08334842 | 0.02254971 |
| ENSG00000133313 | CNDP2    | 2.08310086 | 0.00674003 |
| ENSG00000182511 | FES      | 2.08124765 | 0.00585693 |
| ENSG00000090863 | GLG1     | 2.07175674 | 0.00686317 |
| ENSG00000006715 | VPS41    | 2.06786491 | 0.0058823  |
| ENSG00000123106 | CCDC91   | 2.06575858 | 0.01849331 |
| ENSG00000149084 | HSD17B12 | 2.06249852 | 0.00329769 |
| ENSG00000014138 | POLA2    | 2.05890883 | 0.03087971 |
| ENSG00000138768 | USO1     | 2.05724479 | 0.01698373 |
| ENSG00000155660 | PDIA4    | 2.05661756 | 0.01046554 |
| ENSG00000067704 | IARS2    | 2.05190677 | 0.00683094 |
| ENSG00000167220 | HDHD2    | 2.05170364 | 0.0074401  |
| ENSG00000170876 | TMEM43   | 2.05022357 | 0.01202718 |
| ENSG00000139641 | ESYT1    | 2.04007922 | 0.00706653 |
| ENSG00000159445 | THEM4    | 2.03370264 | 0.00238242 |
| ENSG00000162704 | ARPC5    | 2.031856   | 0.00621715 |
| ENSG00000243943 | ZNF512   | 2.02404075 | 0.01764812 |
| ENSG00000075239 | ACAT1    | 2.02336357 | 0.00678127 |
| ENSG00000164308 | ERAP2    | 2.00102837 | 0.01747714 |
| ENSG00000102524 | TNFSF13B | 1.99467751 | 0.02972242 |
| ENSG00000014216 | CAPN1    | 1.99448283 | 0.00798766 |
| ENSG00000087263 | OGFOD1   | 1.99421872 | 0.01403954 |
| ENSG00000255833 | TIFAB    | 1.99346242 | 0.00212779 |
| ENSG00000138758 | SEPT11   | 1.99278602 | 0.0159471  |
| ENSG00000135317 | SNX14    | 1.99277301 | 0.02398012 |
| ENSG00000134996 | OSTF1    | 1.98817748 | 0.04949211 |
| ENSG00000156587 | UBE2L6   | 1.98563628 | 0.01659642 |
| ENSG00000166888 | STAT6    | 1.98342839 | 0.00366462 |
| ENSG00000128340 | RAC2     | 1.98281961 | 0.0291451  |
| ENSG00000103544 | C16orf62 | 1.97865123 | 0.04701596 |
| ENSG00000130429 | ARPC1B   | 1.96710688 | 0.0060948  |
| ENSG00000088035 | ALG6     | 1.9664866  | 0.03133879 |
| ENSG00000143314 | MRPL24   | 1.9661189  | 0.02259125 |

|                 |         |            |            |
|-----------------|---------|------------|------------|
| ENSG00000137845 | ADAM10  | 1.96078759 | 0.0239978  |
| ENSG00000128915 | ICE2    | 1.95925998 | 0.0053814  |
| ENSG00000177054 | ZDHHC13 | 1.95914759 | 0.018607   |
| ENSG00000178057 | NDUFAF3 | 1.95822904 | 0.00834834 |
| ENSG00000035687 | ADSS    | 1.95778237 | 0.01565564 |
| ENSG00000084733 | RAB10   | 1.95772064 | 0.00366462 |
| ENSG00000115234 | SNX17   | 1.95654784 | 0.00450671 |
| ENSG00000147905 | ZCCHC7  | 1.94631911 | 0.03575874 |
| ENSG00000102710 | SUPT20H | 1.94521725 | 0.00471655 |
| ENSG00000272047 | GTF2H5  | 1.94299036 | 0.00748852 |
| ENSG00000164062 | APEH    | 1.94196538 | 0.02589679 |
| ENSG00000198736 | MSRB1   | 1.93727756 | 0.01216395 |
| ENSG00000136874 | STX17   | 1.93569262 | 0.00373378 |
| ENSG00000112367 | FIG4    | 1.93328907 | 0.0499912  |
| ENSG00000119203 | CPSF3   | 1.93234535 | 0.03489201 |
| ENSG00000108651 | UTP6    | 1.93055903 | 0.02083891 |
| ENSG00000109814 | UGDH    | 1.9275224  | 0.03064301 |
| ENSG00000120925 | RNF170  | 1.92584144 | 0.01371457 |
| ENSG00000159596 | TMEM69  | 1.91866781 | 0.01698373 |
| ENSG00000169116 | PARM1   | 1.91831262 | 0.01283324 |
| ENSG00000080189 | SLC35C2 | 1.91532369 | 0.02259125 |
| ENSG00000141510 | TP53    | 1.91435441 | 0.02477928 |
| ENSG00000138363 | ATIC    | 1.9089075  | 0.01065996 |
| ENSG00000116133 | DHCR24  | 1.90747385 | 0.04834494 |
| ENSG00000183597 | TANGO2  | 1.90622629 | 0.03474393 |
| ENSG00000121691 | CAT     | 1.90505411 | 0.00366462 |
| ENSG00000121281 | ADCY7   | 1.90312789 | 0.01321415 |
| ENSG00000101464 | PIGU    | 1.89949586 | 0.00498718 |
| ENSG00000167272 | POP5    | 1.89909548 | 0.04297077 |
| ENSG00000162600 | OMA1    | 1.89457122 | 0.00563522 |
| ENSG00000185973 | TMLHE   | 1.89071014 | 0.02052985 |
| ENSG00000256043 | CTSO    | 1.89027423 | 0.03288142 |
| ENSG00000197157 | SND1    | 1.88915776 | 0.02428243 |
| ENSG00000032389 | EIPR1   | 1.87940006 | 0.01208677 |
| ENSG00000119321 | FKBP15  | 1.87712459 | 0.00538725 |
| ENSG00000181924 | COA4    | 1.87138696 | 0.04404324 |
| ENSG00000070269 | TMEM260 | 1.87022464 | 0.02813121 |
| ENSG00000155957 | TMBIM4  | 1.86478753 | 0.01382958 |
| ENSG00000138246 | DNAJC13 | 1.86384869 | 0.04149208 |
| ENSG00000090861 | AARS    | 1.85873057 | 0.01863023 |

|                 |          |            |            |
|-----------------|----------|------------|------------|
| ENSG00000131236 | CAP1     | 1.85861215 | 0.00366462 |
| ENSG00000004468 | CD38     | 1.85798611 | 0.00715816 |
| ENSG00000168385 | SEPT2    | 1.85482962 | 0.00505093 |
| ENSG00000110435 | PDHX     | 1.85051266 | 0.0159471  |
| ENSG00000108984 | MAP2K6   | 1.84232405 | 0.0088983  |
| ENSG00000122694 | GLIPR2   | 1.83979317 | 0.00623347 |
| ENSG00000228223 | HCG11    | 1.8396572  | 0.04682276 |
| ENSG00000172775 | FAM192A  | 1.83064498 | 0.03279199 |
| ENSG00000138796 | HADH     | 1.82793971 | 0.00373378 |
| ENSG00000184992 | BRI3BP   | 1.82782933 | 0.03259356 |
| ENSG00000174243 | DDX23    | 1.82695117 | 0.01920078 |
| ENSG00000135336 | ORC3     | 1.82458007 | 0.02598878 |
| ENSG00000196189 | SEMA4A   | 1.82371466 | 0.04199847 |
| ENSG00000000938 | FGR      | 1.82314394 | 0.00782979 |
| ENSG00000170006 | TMEM154  | 1.8145082  | 0.00695581 |
| ENSG00000085871 | MGST2    | 1.81235608 | 0.02052985 |
| ENSG00000110768 | GTF2H1   | 1.8076399  | 0.04916572 |
| ENSG00000143624 | INTS3    | 1.80407194 | 0.01491734 |
| ENSG00000100938 | GMPR2    | 1.80191394 | 0.00718932 |
| ENSG00000122033 | MTIF3    | 1.79769178 | 0.03842738 |
| ENSG00000139278 | GLIPR1   | 1.79725051 | 0.02046969 |
| ENSG00000128654 | MTX2     | 1.79453089 | 0.01831296 |
| ENSG00000213983 | AP1G2    | 1.79205768 | 0.00771252 |
| ENSG00000136270 | TBRG4    | 1.79087807 | 0.01740138 |
| ENSG00000136485 | DCAF7    | 1.79043521 | 0.03743491 |
| ENSG00000205765 | C5orf51  | 1.78837985 | 0.04794577 |
| ENSG00000181804 | SLC9A9   | 1.78735554 | 0.01740138 |
| ENSG00000165795 | NDRG2    | 1.78565459 | 0.03860348 |
| ENSG00000176102 | CSTF3    | 1.78210992 | 0.00498634 |
| ENSG00000108528 | SLC25A11 | 1.7809832  | 0.0225146  |
| ENSG00000138964 | PARVG    | 1.77976448 | 0.00783112 |
| ENSG00000077232 | DNAJC10  | 1.77674394 | 0.03956014 |
| ENSG00000182247 | UBE2E2   | 1.77383984 | 0.02213213 |
| ENSG00000120860 | WASHC3   | 1.77325401 | 0.04700928 |
| ENSG00000152683 | SLC30A6  | 1.76954512 | 0.00642013 |
| ENSG00000168906 | MAT2A    | 1.76732256 | 0.0184155  |
| ENSG00000083535 | PIBF1    | 1.76639128 | 0.01986989 |
| ENSG00000134215 | VAV3     | 1.76456928 | 0.04485765 |
| ENSG00000131374 | TBC1D5   | 1.7600876  | 0.0070359  |
| ENSG00000143106 | PSMA5    | 1.75667886 | 0.00518293 |

|                 |          |            |            |
|-----------------|----------|------------|------------|
| ENSG00000171307 | ZDHHC16  | 1.75581291 | 0.0184155  |
| ENSG00000089063 | TMEM230  | 1.75554914 | 0.02435736 |
| ENSG00000188452 | CERKL    | 1.75073598 | 0.01764523 |
| ENSG00000073969 | NSF      | 1.74689502 | 0.04337462 |
| ENSG00000006744 | ELAC2    | 1.7451714  | 0.03815034 |
| ENSG00000138071 | ACTR2    | 1.74218255 | 0.00471655 |
| ENSG00000092531 | SNAP23   | 1.74089869 | 0.02373064 |
| ENSG00000078618 | NRDC     | 1.73547728 | 0.04120458 |
| ENSG00000149089 | APIP     | 1.72848666 | 0.00695581 |
| ENSG00000117632 | STMN1    | 1.72686    | 0.02567634 |
| ENSG00000177628 | GBA      | 1.72678781 | 0.04466065 |
| ENSG00000273749 | CYFIP1   | 1.72137066 | 0.04149208 |
| ENSG00000138413 | IDH1     | 1.71448061 | 0.01517814 |
| ENSG00000131652 | THOC6    | 1.70927481 | 0.00718932 |
| ENSG00000104325 | DECR1    | 1.7063217  | 0.00086792 |
| ENSG00000113312 | TTC1     | 1.70394262 | 0.0102919  |
| ENSG00000136628 | EPRS     | 1.70315632 | 0.037056   |
| ENSG00000088451 | TGDS     | 1.70293082 | 0.04806862 |
| ENSG00000182551 | ADI1     | 1.69931137 | 0.00329769 |
| ENSG00000096968 | JAK2     | 1.69650899 | 0.04491806 |
| ENSG00000131828 | PDHA1    | 1.69645807 | 0.00471655 |
| ENSG00000140395 | WDR61    | 1.69609591 | 0.03676234 |
| ENSG00000122986 | HVCN1    | 1.68983788 | 0.04685849 |
| ENSG00000104812 | GYS1     | 1.6895187  | 0.00548871 |
| ENSG00000110108 | TMEM109  | 1.6848329  | 0.01936255 |
| ENSG00000031081 | ARHGAP31 | 1.68019503 | 0.00718932 |
| ENSG00000188321 | ZNF559   | 1.67943891 | 0.04733928 |
| ENSG00000145348 | TBCK     | 1.6758879  | 0.04543213 |
| ENSG00000141959 | PFKL     | 1.67301115 | 0.01734575 |
| ENSG00000088205 | DDX18    | 1.66292701 | 0.02034028 |
| ENSG00000141349 | G6PC3    | 1.65694636 | 0.00509902 |
| ENSG00000249915 | PDCD6    | 1.65438062 | 0.01607135 |
| ENSG00000094914 | AAAS     | 1.65321137 | 0.02178995 |
| ENSG00000148634 | HERC4    | 1.65091532 | 0.04120458 |
| ENSG00000241553 | ARPC4    | 1.64852211 | 0.00471655 |
| ENSG00000101246 | ARFRP1   | 1.6474074  | 0.01498374 |
| ENSG00000014641 | MDH1     | 1.64713785 | 0.01184988 |
| ENSG00000204619 | PPP1R11  | 1.64151227 | 0.00751565 |
| ENSG00000117280 | RAB29    | 1.64123066 | 0.02513578 |
| ENSG00000109911 | ELP4     | 1.63994861 | 0.04936695 |

|                 |          |            |            |
|-----------------|----------|------------|------------|
| ENSG00000127946 | HIP1     | 1.63988273 | 0.02095779 |
| ENSG00000114956 | DGUOK    | 1.62764348 | 0.03247044 |
| ENSG00000146376 | ARHGAP18 | 1.62659247 | 0.00236932 |
| ENSG00000169019 | COMMD8   | 1.61957748 | 0.02882527 |
| ENSG00000156110 | ADK      | 1.61949922 | 0.00366462 |
| ENSG00000162813 | BPNT1    | 1.61931129 | 0.01918626 |
| ENSG00000147471 | PLPBP    | 1.61714025 | 0.01972577 |
| ENSG00000120053 | GOT1     | 1.61486095 | 0.00414186 |
| ENSG00000198814 | GK       | 1.61386071 | 0.00771252 |
| ENSG00000066583 | ISOC1    | 1.61272735 | 0.01836102 |
| ENSG00000105676 | ARMC6    | 1.61269789 | 0.00709631 |
| ENSG00000163346 | PBXIP1   | 1.61145872 | 0.02274656 |
| ENSG00000156973 | PDE6D    | 1.60933264 | 0.0108102  |
| ENSG00000125703 | ATG4C    | 1.6090627  | 0.02248772 |
| ENSG00000124702 | KLHDC3   | 1.6080931  | 0.00373194 |
| ENSG00000108622 | ICAM2    | 1.60770762 | 0.00809412 |
| ENSG00000100201 | DDX17    | 1.60554428 | 0.04949211 |
| ENSG00000182179 | UBA7     | 1.60384845 | 0.0287894  |
| ENSG00000187688 | TRPV2    | 1.60332056 | 0.00798925 |
| ENSG00000149196 | HIKESHI  | 1.59916945 | 0.01636258 |
| ENSG00000162946 | DISC1    | 1.59411755 | 0.00785938 |
| ENSG00000088827 | SIGLEC1  | 1.59338331 | 0.02399459 |
| ENSG00000162735 | PEX19    | 1.59181511 | 0.04044427 |
| ENSG00000129691 | ASH2L    | 1.59058308 | 0.02886473 |
| ENSG00000168394 | TAP1     | 1.58770237 | 0.03148322 |
| ENSG00000132182 | NUP210   | 1.58555771 | 0.0473165  |
| ENSG00000175938 | ORAI3    | 1.58502623 | 0.00373194 |
| ENSG00000134452 | FBXO18   | 1.58402095 | 0.00906886 |
| ENSG00000196576 | PLXNB2   | 1.58273003 | 0.04480124 |
| ENSG00000099899 | TRMT2A   | 1.58232477 | 0.02820495 |
| ENSG00000125877 | ITPA     | 1.58025065 | 0.00373194 |
| ENSG00000170248 | PDCD6IP  | 1.57926176 | 0.0080564  |
| ENSG00000102316 | MAGED2   | 1.57519043 | 0.00897674 |
| ENSG00000136271 | DDX56    | 1.57485191 | 0.00892823 |
| ENSG00000119616 | FCF1     | 1.57422682 | 0.01778545 |
| ENSG00000147592 | LACTB2   | 1.57350347 | 0.01491734 |
| ENSG00000109572 | CLCN3    | 1.57237796 | 0.03724185 |
| ENSG00000108389 | MTMR4    | 1.57116178 | 0.00885073 |
| ENSG00000138629 | UBL7     | 1.57055584 | 0.03327519 |
| ENSG00000100714 | MTHFD1   | 1.56665968 | 0.03205559 |

|                 |            |            |            |
|-----------------|------------|------------|------------|
| ENSG00000135457 | TFCP2      | 1.56555175 | 0.002059   |
| ENSG00000129480 | DTD2       | 1.56436779 | 0.02044521 |
| ENSG00000160310 | PRMT2      | 1.56277539 | 0.04787676 |
| ENSG00000108479 | GALK1      | 1.56201279 | 0.00706653 |
| ENSG00000100395 | L3MBTL2    | 1.56123945 | 0.01666316 |
| ENSG00000160213 | CSTB       | 1.56071938 | 0.01530022 |
| ENSG00000140262 | TCF12      | 1.55900951 | 0.00366462 |
| ENSG00000223501 | VPS52      | 1.55486214 | 0.0069917  |
| ENSG00000157637 | SLC38A10   | 1.55228723 | 0.00808263 |
| ENSG00000198252 | STYX       | 1.55066317 | 0.00373194 |
| ENSG00000180370 | PAK2       | 1.54978257 | 0.00678127 |
| ENSG00000163344 | PMVK       | 1.54958534 | 0.04949211 |
| ENSG00000124508 | BTN2A2     | 1.54923435 | 0.01040756 |
| ENSG00000204261 | PSMB8-AS1  | 1.54647747 | 0.01382796 |
| ENSG00000165609 | NUDT5      | 1.5464016  | 0.01920078 |
| ENSG00000077380 | DYNC1I2    | 1.54433065 | 0.00719913 |
| ENSG00000135624 | CCT7       | 1.54087321 | 0.01530022 |
| ENSG00000013364 | MVP        | 1.53339149 | 0.01298825 |
| ENSG00000110871 | COQ5       | 1.53185169 | 0.01698373 |
| ENSG00000131473 | ACLY       | 1.53045419 | 0.02615942 |
| ENSG00000129317 | PUS7L      | 1.52568904 | 0.04483242 |
| ENSG00000134851 | TMEM165    | 1.52339767 | 0.00678127 |
| ENSG00000033050 | ABCF2      | 1.52272164 | 0.04794577 |
| ENSG00000241468 | ATP5J2     | 1.52189757 | 0.0095478  |
| ENSG00000112079 | STK38      | 1.5184563  | 0.04133962 |
| ENSG00000223960 | AC009948.1 | 1.51472539 | 0.00719913 |
| ENSG00000085491 | SLC25A24   | 1.51410362 | 0.037056   |
| ENSG00000165476 | REEP3      | 1.5113931  | 0.03067089 |
| ENSG00000150753 | CCT5       | 1.50788036 | 0.01638433 |
| ENSG00000102309 | PIN4       | 1.50580323 | 0.04940805 |
| ENSG00000171155 | C1GALT1C1  | 1.50396023 | 0.01677843 |
| ENSG00000160551 | TAOK1      | 1.50351125 | 0.04395127 |
| ENSG00000163154 | TNFAIP8L2  | 1.50292149 | 0.01607135 |
| ENSG00000127948 | POR        | 1.50205485 | 0.0473165  |
| ENSG00000186594 | MIR22HG    | -4.1138605 | 0.037056   |
| ENSG00000169895 | SYAP1      | -3.6935282 | 0.04888382 |
| ENSG00000175197 | DDIT3      | -3.6292117 | 0.01786554 |
| ENSG00000104312 | RIPK2      | -3.5049456 | 0.02687948 |
| ENSG00000131669 | NINJ1      | -3.4464943 | 0.0095529  |
| ENSG00000171988 | JMJD1C     | -3.4364109 | 0.02222424 |

|                 |            |            |            |
|-----------------|------------|------------|------------|
| ENSG00000120690 | ELF1       | -3.3945734 | 0.02594793 |
| ENSG00000169508 | GPR183     | -3.3343572 | 0.02220983 |
| ENSG00000154640 | BTG3       | -3.3100222 | 0.01341595 |
| ENSG00000277117 | FP565260.3 | -3.2554304 | 0.03348651 |
| ENSG00000160223 | ICOSLG     | -3.2221071 | 0.01516728 |
| ENSG00000011422 | PLAUR      | -3.1857979 | 0.02259125 |
| ENSG00000114784 | EIF1B      | -3.1774242 | 0.01366317 |
| ENSG00000165233 | CARD19     | -3.0676944 | 0.00771252 |
| ENSG00000120705 | ETF1       | -3.0238314 | 0.02922772 |
| ENSG00000099860 | GADD45B    | -2.9778697 | 0.02435736 |
| ENSG00000130340 | SNX9       | -2.9684615 | 0.03585533 |
| ENSG00000196233 | LCOR       | -2.9437394 | 0.02052985 |
| ENSG00000197170 | PSMD12     | -2.8873085 | 0.0159471  |
| ENSG00000173812 | EIF1       | -2.8629371 | 0.01118101 |
| ENSG00000169905 | TOR1AIP2   | -2.845181  | 0.02109402 |
| ENSG00000272886 | DCP1A      | -2.8334997 | 0.00414186 |
| ENSG00000025156 | HSF2       | -2.8308445 | 0.00136833 |
| ENSG00000143153 | ATP1B1     | -2.7778394 | 0.00509326 |
| ENSG00000184205 | TSPYL2     | -2.7635336 | 0.0276593  |
| ENSG00000068697 | LAPTM4A    | -2.742152  | 0.01921875 |
| ENSG00000143507 | DUSP10     | -2.7355762 | 0.03535037 |
| ENSG00000146457 | WTAP       | -2.735327  | 0.01746478 |
| ENSG00000110852 | CLEC2B     | -2.7079704 | 0.00373194 |
| ENSG00000151012 | SLC7A11    | -2.705993  | 0.02775042 |
| ENSG00000150907 | FOXO1      | -2.6787004 | 0.01662887 |
| ENSG00000121966 | CXCR4      | -2.676161  | 0.0414865  |
| ENSG00000067082 | KLF6       | -2.671159  | 0.03034903 |
| ENSG00000134107 | BHLHE40    | -2.6703527 | 0.03259356 |
| ENSG00000116044 | NFE2L2     | -2.6667114 | 0.04483242 |
| ENSG00000113070 | HBEGF      | -2.657094  | 0.01651978 |
| ENSG00000138069 | RAB1A      | -2.6237485 | 0.02565202 |
| ENSG00000171522 | PTGER4     | -2.6039809 | 0.02407448 |
| ENSG00000104765 | BNIP3L     | -2.6025565 | 0.01209023 |
| ENSG00000119326 | CTNNA1     | -2.5966732 | 0.00812086 |
| ENSG00000114796 | KLHL24     | -2.5933178 | 0.00943543 |
| ENSG00000135655 | USP15      | -2.5879499 | 0.01686697 |
| ENSG00000277632 | CCL3       | -2.5855865 | 0.03558605 |
| ENSG00000118308 | LRMP       | -2.5694642 | 0.0291451  |
| ENSG00000173575 | CHD2       | -2.5502927 | 0.03262661 |
| ENSG00000267520 | AC010733.2 | -2.5416381 | 0.01944561 |

|                 |            |            |            |
|-----------------|------------|------------|------------|
| ENSG00000120129 | DUSP1      | -2.5176534 | 0.01849331 |
| ENSG00000136950 | ARPC5L     | -2.4969028 | 0.00848138 |
| ENSG00000185477 | GPRIN3     | -2.4953763 | 0.00538725 |
| ENSG00000162924 | REL        | -2.4769513 | 0.00366462 |
| ENSG00000166822 | TMEM170A   | -2.474987  | 0.03035108 |
| ENSG00000124782 | RREB1      | -2.4708018 | 0.00498718 |
| ENSG00000120616 | EPC1       | -2.4696606 | 0.00719913 |
| ENSG00000117000 | RLF        | -2.4630327 | 0.02304511 |
| ENSG00000111615 | KRR1       | -2.4532643 | 0.01803367 |
| ENSG00000107937 | GTPBP4     | -2.4521505 | 0.01700522 |
| ENSG00000163961 | RNF168     | -2.4425438 | 0.01530022 |
| ENSG00000185650 | ZFP36L1    | -2.436076  | 0.00373378 |
| ENSG00000089818 | NECAP1     | -2.4218155 | 0.01118014 |
| ENSG00000150977 | RILPL2     | -2.4151521 | 0.04793703 |
| ENSG00000132952 | USPL1      | -2.4128638 | 0.02471595 |
| ENSG00000013441 | CLK1       | -2.4099282 | 0.00574457 |
| ENSG00000272888 | LINC01578  | -2.3985687 | 0.0071252  |
| ENSG00000139977 | NAA30      | -2.3978653 | 0.00373194 |
| ENSG00000105821 | DNAJC2     | -2.3925275 | 0.01118101 |
| ENSG00000115165 | CYTIP      | -2.3875843 | 0.03287197 |
| ENSG00000144674 | GOLGA4     | -2.3827561 | 0.00427995 |
| ENSG00000081320 | STK17B     | -2.3761399 | 0.03823614 |
| ENSG00000011566 | MAP4K3     | -2.3741461 | 0.01565564 |
| ENSG00000128272 | ATF4       | -2.367223  | 0.0102919  |
| ENSG00000133134 | BEX2       | -2.3659944 | 0.00231608 |
| ENSG00000135404 | CD63       | -2.3636386 | 0.03593778 |
| ENSG00000100644 | HIF1A      | -2.3585647 | 0.00643515 |
| ENSG00000204977 | TRIM13     | -2.3487972 | 0.02488781 |
| ENSG00000100393 | EP300      | -2.3299326 | 0.002059   |
| ENSG00000163874 | ZC3H12A    | -2.3204056 | 0.01651978 |
| ENSG00000189376 | C8orf76    | -2.3191063 | 0.02882527 |
| ENSG00000102908 | NFAT5      | -2.31265   | 0.04949211 |
| ENSG00000059728 | MXD1       | -2.3005657 | 0.04005277 |
| ENSG00000122644 | ARL4A      | -2.3000878 | 0.0498361  |
| ENSG00000115946 | PNO1       | -2.2847106 | 0.01651978 |
| ENSG00000270681 | AC095055.1 | -2.2813465 | 0.01046554 |
| ENSG00000145241 | CENPC      | -2.2796577 | 0.03259356 |
| ENSG00000120733 | KDM3B      | -2.2779398 | 0.02350696 |
| ENSG00000005483 | KMT2E      | -2.2773755 | 0.00952539 |
| ENSG00000178381 | ZFAND2A    | -2.2759391 | 0.01529195 |



|                 |            |            |            |
|-----------------|------------|------------|------------|
| ENSG00000255198 | SNHG9      | -2.2736608 | 0.01641025 |
| ENSG00000163605 | PPP4R2     | -2.264769  | 0.03228479 |
| ENSG00000001561 | ENPP4      | -2.2537182 | 0.04703942 |
| ENSG00000117569 | PTBP2      | -2.2519153 | 0.03034903 |
| ENSG00000080822 | CLDND1     | -2.2506605 | 0.03814153 |
| ENSG00000188647 | PTAR1      | -2.2470642 | 0.02053825 |
| ENSG00000114098 | ARMC8      | -2.2421448 | 0.02589679 |
| ENSG00000112137 | PHACTR1    | -2.2401225 | 0.00670978 |
| ENSG00000115520 | COQ10B     | -2.2373364 | 0.013493   |
| ENSG00000091164 | TXNL1      | -2.2326181 | 0.00709631 |
| ENSG00000075415 | SLC25A3    | -2.2167682 | 0.04792734 |
| ENSG00000153922 | CHD1       | -2.2050932 | 0.00373194 |
| ENSG00000102580 | DNAJC3     | -2.2043728 | 0.00427995 |
| ENSG00000047634 | SCML1      | -2.2033829 | 0.04637292 |
| ENSG00000271614 | ATP2B1-AS1 | -2.2008705 | 0.02056281 |
| ENSG00000117139 | KDM5B      | -2.1966822 | 0.01686697 |
| ENSG00000100614 | PPM1A      | -2.1878349 | 0.04597372 |
| ENSG00000136603 | SKIL       | -2.18575   | 0.02360332 |
| ENSG00000155307 | SAMSN1     | -2.1854028 | 0.04158965 |
| ENSG00000105968 | H2AFV      | -2.1838924 | 0.01212266 |
| ENSG00000121741 | ZMYM2      | -2.1836391 | 0.01040756 |
| ENSG00000161011 | SQSTM1     | -2.1831974 | 0.02504834 |
| ENSG00000032219 | ARID4A     | -2.1799884 | 0.00498634 |
| ENSG00000138593 | SECISBP2L  | -2.179669  | 0.02398012 |
| ENSG00000067064 | IDI1       | -2.1776063 | 0.0095478  |
| ENSG00000117410 | ATP6V0B    | -2.1766065 | 0.03645327 |
| ENSG00000064012 | CASP8      | -2.164785  | 0.04923352 |
| ENSG00000137947 | GTF2B      | -2.1631284 | 0.01651978 |
| ENSG00000126524 | SBDS       | -2.1627109 | 0.0088983  |
| ENSG00000087460 | GNAS       | -2.1617571 | 0.0383737  |
| ENSG00000106615 | RHEB       | -2.1573998 | 0.01404513 |
| ENSG00000008294 | SPAG9      | -2.1568151 | 0.03950432 |
| ENSG00000163788 | SNRK       | -2.1497816 | 0.01688977 |
| ENSG00000160570 | DEDD2      | -2.1427921 | 0.03185424 |
| ENSG00000111011 | RSRC2      | -2.1414172 | 0.00366462 |
| ENSG00000180747 | SMG1P3     | -2.1398988 | 0.04580405 |
| ENSG00000197021 | CXorf40B   | -2.1371799 | 0.01981956 |
| ENSG00000048405 | ZNF800     | -2.1367196 | 0.01636258 |
| ENSG00000144747 | TMF1       | -2.1363366 | 0.00894515 |
| ENSG00000113580 | NR3C1      | -2.1357775 | 0.02274656 |

|                 |          |            |            |
|-----------------|----------|------------|------------|
| ENSG00000083799 | CYLD     | -2.128274  | 0.03645327 |
| ENSG00000213923 | CSNK1E   | -2.1231989 | 0.0088983  |
| ENSG00000176407 | KCMF1    | -2.1192581 | 0.01565564 |
| ENSG00000161526 | SAP30BP  | -2.118821  | 0.01633796 |
| ENSG00000118689 | FOXO3    | -2.1162289 | 0.00414186 |
| ENSG00000113811 | SELENOK  | -2.1155648 | 0.00366462 |
| ENSG00000139697 | SBNO1    | -2.1025971 | 0.013493   |
| ENSG00000135093 | USP30    | -2.0988346 | 0.02085529 |
| ENSG00000006607 | FARP2    | -2.0975951 | 0.03960245 |
| ENSG00000132823 | OSER1    | -2.0975217 | 0.02360332 |
| ENSG00000165806 | CASP7    | -2.0951807 | 0.02132332 |
| ENSG00000136451 | VEZF1    | -2.0882355 | 0.00450671 |
| ENSG00000187837 | HIST1H1C | -2.0821429 | 0.02440446 |
| ENSG00000176845 | METRNL   | -2.080076  | 0.00373194 |
| ENSG00000140743 | CDR2     | -2.0730612 | 0.02259125 |
| ENSG00000162664 | ZNF326   | -2.0716828 | 0.00471655 |
| ENSG00000005339 | CREBBP   | -2.0672713 | 0.0360832  |
| ENSG00000124688 | MAD2L1BP | -2.0644079 | 0.00231608 |
| ENSG00000160799 | CCDC12   | -2.0627806 | 0.0184155  |
| ENSG00000020633 | RUNX3    | -2.0618496 | 0.03365163 |
| ENSG00000100528 | CNIH1    | -2.053928  | 0.01118014 |
| ENSG00000138050 | THUMPD2  | -2.0529135 | 0.02922772 |
| ENSG00000140995 | DEF8     | -2.0505927 | 0.03309042 |
| ENSG00000115738 | ID2      | -2.0494412 | 0.01003557 |
| ENSG00000105849 | TWISTNB  | -2.0375851 | 0.00366462 |
| ENSG00000015568 | RGPD5    | -2.0328509 | 0.00462374 |
| ENSG00000186162 | CIDECP   | -2.0315175 | 0.00471655 |
| ENSG00000124226 | RNF114   | -2.0279585 | 0.00366462 |
| ENSG00000152484 | USP12    | -2.024435  | 0.0278803  |
| ENSG00000113163 | COL4A3BP | -2.0221942 | 0.00366462 |
| ENSG00000122068 | FYTTD1   | -2.018704  | 0.00695581 |
| ENSG00000113615 | SEC24A   | -2.0168449 | 0.03950432 |
| ENSG00000239305 | RNF103   | -2.0139912 | 0.01786554 |
| ENSG00000074266 | EED      | -2.0126258 | 0.03279199 |
| ENSG00000086666 | ZFAND6   | -2.0125353 | 0.00471655 |
| ENSG00000114416 | FXR1     | -2.0109795 | 0.0164287  |
| ENSG00000183484 | GPR132   | -2.0088306 | 0.01901204 |
| ENSG00000070831 | CDC42    | -2.004092  | 0.00950579 |
| ENSG00000123091 | RNF11    | -1.9982661 | 0.03288142 |
| ENSG00000101146 | RAE1     | -1.997937  | 0.01800346 |

|                 |          |            |            |
|-----------------|----------|------------|------------|
| ENSG00000220205 | VAMP2    | -1.9935544 | 0.00366094 |
| ENSG00000198780 | FAM169A  | -1.9880729 | 0.00643515 |
| ENSG00000124177 | CHD6     | -1.9868299 | 0.03012117 |
| ENSG00000083937 | CHMP2B   | -1.9863551 | 0.01284201 |
| ENSG00000145779 | TNFAIP8  | -1.9853279 | 0.02833847 |
| ENSG00000155744 | FAM126B  | -1.9852854 | 0.04698791 |
| ENSG00000131263 | RLIM     | -1.9850418 | 0.023638   |
| ENSG00000156650 | KAT6B    | -1.9847407 | 0.00518293 |
| ENSG00000076554 | TPD52    | -1.983622  | 0.02230772 |
| ENSG00000172845 | SP3      | -1.9789946 | 0.01831296 |
| ENSG00000179833 | SERTAD2  | -1.9784744 | 0.00471655 |
| ENSG00000108510 | MED13    | -1.9775367 | 0.00565028 |
| ENSG00000213096 | ZNF254   | -1.9762201 | 0.01659642 |
| ENSG00000115310 | RTN4     | -1.974329  | 0.02095779 |
| ENSG00000083896 | YTHDC1   | -1.9737135 | 0.02845741 |
| ENSG00000152133 | GPATCH11 | -1.9736697 | 0.04700928 |
| ENSG00000104447 | TRPS1    | -1.9712435 | 0.0080564  |
| ENSG00000144802 | NFKBIZ   | -1.9680102 | 0.03365163 |
| ENSG00000101247 | NDUFAF5  | -1.9651746 | 0.02471963 |
| ENSG00000180228 | PRKRA    | -1.9650885 | 0.01530022 |
| ENSG00000278311 | GGNBP2   | -1.9647999 | 0.02052985 |
| ENSG00000183604 | SMG1P5   | -1.9634269 | 0.00910301 |
| ENSG00000101782 | RIOK3    | -1.9623211 | 0.04752992 |
| ENSG00000197857 | ZNF44    | -1.9585977 | 0.01118101 |
| ENSG00000008083 | JARID2   | -1.9565897 | 0.00393434 |
| ENSG00000144566 | RAB5A    | -1.9552067 | 0.0157351  |
| ENSG00000111832 | RWDD1    | -1.9549769 | 0.02573744 |
| ENSG00000125651 | GTF2F1   | -1.9502405 | 0.00525643 |
| ENSG00000112242 | E2F3     | -1.9492172 | 0.02046898 |
| ENSG00000057657 | PRDM1    | -1.9490263 | 0.0095478  |
| ENSG00000101596 | SMCHD1   | -1.9456298 | 0.03221962 |
| ENSG00000135018 | UBQLN1   | -1.9455278 | 0.00450671 |
| ENSG00000197019 | SERTAD1  | -1.944542  | 0.00373194 |
| ENSG00000164615 | CAMLG    | -1.9443022 | 0.01565564 |
| ENSG00000145675 | PIK3R1   | -1.943078  | 0.04297077 |
| ENSG00000137876 | RSL24D1  | -1.9416112 | 0.01834035 |
| ENSG00000123358 | NR4A1    | -1.9402544 | 0.0291451  |
| ENSG00000124201 | ZNFX1    | -1.9402019 | 0.04010247 |
| ENSG00000119801 | YPEL5    | -1.9398959 | 0.02259125 |
| ENSG00000162923 | WDR26    | -1.938859  | 0.01323649 |

|                 |            |            |            |
|-----------------|------------|------------|------------|
| ENSG00000168264 | IRF2BP2    | -1.9382528 | 0.00414186 |
| ENSG00000159346 | ADIPOR1    | -1.9348955 | 0.02589679 |
| ENSG00000100425 | BRD1       | -1.9339988 | 0.00943543 |
| ENSG00000101654 | RNMT       | -1.9267108 | 0.0376018  |
| ENSG00000103121 | CMC2       | -1.9191775 | 0.01882969 |
| ENSG00000156675 | RAB11FIP1  | -1.9183849 | 0.01401736 |
| ENSG00000006576 | PHTF2      | -1.917113  | 0.01969645 |
| ENSG00000147872 | PLIN2      | -1.91664   | 0.03653071 |
| ENSG00000100852 | ARHGAP5    | -1.9165827 | 0.01922859 |
| ENSG00000170385 | SLC30A1    | -1.9081168 | 0.0498361  |
| ENSG00000140153 | WDR20      | -1.9078328 | 0.00643515 |
| ENSG00000196850 | PPTC7      | -1.9043128 | 0.02750331 |
| ENSG00000096746 | HNRNPH3    | -1.8950537 | 0.002059   |
| ENSG00000272196 | HIST2H2AA4 | -1.8877796 | 0.01651978 |
| ENSG00000129351 | ILF3       | -1.8846709 | 0.01824229 |
| ENSG00000120727 | PAIP2      | -1.8772952 | 0.0467091  |
| ENSG00000095574 | IKZF5      | -1.8754389 | 0.04020907 |
| ENSG00000082515 | MRPL22     | -1.8707563 | 0.03228368 |
| ENSG00000150991 | UBC        | -1.8689767 | 0.02820495 |
| ENSG00000187522 | HSPA14     | -1.867056  | 0.00414186 |
| ENSG00000183624 | HMCES      | -1.863544  | 0.00231608 |
| ENSG00000027697 | IFNGR1     | -1.8604347 | 0.00518293 |
| ENSG00000134453 | RBM17      | -1.8584692 | 0.02610459 |
| ENSG00000173276 | ZBTB21     | -1.8564865 | 0.03259356 |
| ENSG00000101544 | ADNP2      | -1.8551142 | 0.0322021  |
| ENSG00000132475 | H3F3B      | -1.8493775 | 0.0108102  |
| ENSG00000169826 | CSGALNACT2 | -1.8489192 | 0.02540537 |
| ENSG00000184182 | UBE2F      | -1.8486154 | 0.03300659 |
| ENSG00000146425 | DYNLT1     | -1.8468949 | 0.04820922 |
| ENSG00000230551 | AC021078.1 | -1.8467533 | 0.00674003 |
| ENSG00000269926 | DDIT4-AS1  | -1.8458646 | 0.04840339 |
| ENSG00000094975 | SUCO       | -1.8424783 | 0.03515012 |
| ENSG00000265681 | RPL17      | -1.8407111 | 0.01750196 |
| ENSG00000101558 | VAPA       | -1.84037   | 0.04158427 |
| ENSG00000004897 | CDC27      | -1.8398906 | 0.03650675 |
| ENSG00000097007 | ABL1       | -1.8381003 | 0.0154968  |
| ENSG00000106829 | TLE4       | -1.8359712 | 0.02841211 |
| ENSG00000182149 | IST1       | -1.8342697 | 0.00718932 |
| ENSG00000228830 | AL160408.2 | -1.8299424 | 0.00366462 |
| ENSG00000101109 | STK4       | -1.8210315 | 0.00414186 |

|                 |            |            |            |
|-----------------|------------|------------|------------|
| ENSG00000138750 | NUP54      | -1.8166616 | 0.00518293 |
| ENSG00000109466 | KLHL2      | -1.8165383 | 0.01488832 |
| ENSG00000112773 | FAM46A     | -1.8155196 | 0.03645327 |
| ENSG00000075426 | FOSL2      | -1.8140914 | 0.0416784  |
| ENSG00000019995 | ZRANB1     | -1.812823  | 0.03764973 |
| ENSG00000176624 | MEX3C      | -1.8101519 | 0.002059   |
| ENSG00000177885 | GRB2       | -1.8096175 | 0.00678127 |
| ENSG00000115540 | MOB4       | -1.8093547 | 0.00414186 |
| ENSG00000196396 | PTPN1      | -1.8083053 | 0.0075056  |
| ENSG00000163960 | UBXN7      | -1.8042536 | 0.03602727 |
| ENSG00000140455 | USP3       | -1.8015012 | 0.04024955 |
| ENSG00000196504 | PRPF40A    | -1.8012192 | 0.01734575 |
| ENSG00000100483 | VCPKMT     | -1.8006405 | 0.01298825 |
| ENSG00000008952 | SEC62      | -1.7986837 | 0.02615942 |
| ENSG00000183735 | TBK1       | -1.7949466 | 0.03259356 |
| ENSG00000124762 | CDKN1A     | -1.790485  | 0.03653071 |
| ENSG00000068745 | IP6K2      | -1.7896868 | 0.0064376  |
| ENSG00000143702 | CEP170     | -1.7801982 | 0.01863023 |
| ENSG00000011007 | ELOA       | -1.77355   | 0.01599822 |
| ENSG00000184007 | PTP4A2     | -1.7733847 | 0.01801069 |
| ENSG00000137815 | RTF1       | -1.7721063 | 0.02407448 |
| ENSG00000108175 | ZMIZ1      | -1.7699173 | 0.01301122 |
| ENSG00000134058 | CDK7       | -1.7674828 | 0.01404513 |
| ENSG00000033327 | GAB2       | -1.7656548 | 0.00427995 |
| ENSG00000156535 | CD109      | -1.7612595 | 0.01948002 |
| ENSG00000118181 | RPS25      | -1.7593344 | 0.04113773 |
| ENSG00000116030 | SUMO1      | -1.7579458 | 0.00518293 |
| ENSG00000104388 | RAB2A      | -1.7575095 | 0.01753258 |
| ENSG00000260708 | AL118516.1 | -1.7563172 | 0.01641025 |
| ENSG00000122482 | ZNF644     | -1.752177  | 0.01423498 |
| ENSG00000185811 | IKZF1      | -1.7518942 | 0.00538725 |
| ENSG00000198265 | HELZ       | -1.7505386 | 0.02861146 |
| ENSG00000198355 | PIM3       | -1.748421  | 0.01386124 |
| ENSG00000168092 | PAFAH1B2   | -1.7443667 | 0.01740339 |
| ENSG00000112096 | SOD2       | -1.7439983 | 0.00366462 |
| ENSG00000197780 | TAF13      | -1.7436453 | 0.03327495 |
| ENSG00000142227 | EMP3       | -1.7416279 | 0.02066978 |
| ENSG00000023287 | RB1CC1     | -1.7411566 | 0.03095398 |
| ENSG00000168214 | RBPJ       | -1.7361356 | 0.02765943 |
| ENSG00000162910 | MRPL55     | -1.7361119 | 0.04949211 |

|                 |            |            |            |
|-----------------|------------|------------|------------|
| ENSG00000168438 | CDC40      | -1.7360775 | 0.01602721 |
| ENSG00000106052 | TAX1BP1    | -1.7324488 | 0.00349365 |
| ENSG00000047249 | ATP6V1H    | -1.7225702 | 0.00694626 |
| ENSG00000121749 | TBC1D15    | -1.7182926 | 0.01118014 |
| ENSG00000132478 | UNK        | -1.7155076 | 0.04727882 |
| ENSG00000147548 | NSD3       | -1.7152432 | 0.01757603 |
| ENSG00000185947 | ZNF267     | -1.712521  | 0.04169608 |
| ENSG00000131876 | SNRPA1     | -1.7094338 | 0.01750196 |
| ENSG00000105993 | DNAJB6     | -1.7081557 | 0.00562571 |
| ENSG00000051108 | HERPUD1    | -1.7078525 | 0.02402911 |
| ENSG00000118620 | ZNF430     | -1.7032836 | 0.01359262 |
| ENSG00000182568 | SATB1      | -1.701464  | 0.01892978 |
| ENSG00000099622 | CIRBP      | -1.7006455 | 0.01599822 |
| ENSG00000275740 | AC091959.3 | -1.7000485 | 0.02098066 |
| ENSG00000117614 | SYF2       | -1.6995587 | 0.01404513 |
| ENSG00000143761 | ARF1       | -1.6975774 | 0.03298113 |
| ENSG00000109920 | FNBP4      | -1.6964028 | 0.01659642 |
| ENSG00000153066 | TXNDC11    | -1.6916219 | 0.02356641 |
| ENSG00000089737 | DDX24      | -1.6900113 | 0.00552569 |
| ENSG00000164611 | PTTG1      | -1.6888559 | 0.01921875 |
| ENSG00000150787 | PTS        | -1.6860297 | 0.00684755 |
| ENSG00000128016 | ZFP36      | -1.6833588 | 0.01528261 |
| ENSG00000255073 | ZFP91-CNTF | -1.682648  | 0.02815656 |
| ENSG00000198815 | FOXJ3      | -1.6814044 | 0.00471655 |
| ENSG00000187109 | NAP1L1     | -1.6785751 | 0.02552889 |
| ENSG00000116670 | MAD2L2     | -1.6785118 | 0.02775042 |
| ENSG00000116560 | SFPQ       | -1.6754683 | 0.01636932 |
| ENSG00000173960 | UBXN2A     | -1.6747454 | 0.00972062 |
| ENSG00000100083 | GGA1       | -1.6745857 | 0.01040756 |
| ENSG00000166848 | TERF2IP    | -1.6732968 | 0.03645327 |
| ENSG00000188342 | GTF2F2     | -1.6714031 | 0.00427995 |
| ENSG00000132326 | PER2       | -1.6705062 | 0.01473428 |
| ENSG00000196470 | SIAH1      | -1.6700226 | 0.03185424 |
| ENSG00000089234 | BRAP       | -1.6662239 | 0.02841211 |
| ENSG00000034677 | RNF19A     | -1.6651371 | 0.04313599 |
| ENSG00000167193 | CRK        | -1.6582165 | 0.03309042 |
| ENSG00000132819 | RBM38      | -1.6578812 | 0.02822721 |
| ENSG00000124214 | STAU1      | -1.6562073 | 0.03815966 |
| ENSG00000162928 | PEX13      | -1.6557464 | 0.01698373 |
| ENSG00000070495 | JMJD6      | -1.6520593 | 0.01492402 |

|                 |            |            |            |
|-----------------|------------|------------|------------|
| ENSG00000163682 | RPL9       | -1.6475759 | 0.02776518 |
| ENSG00000234545 | FAM133B    | -1.6421073 | 0.01530022 |
| ENSG00000136819 | C9orf78    | -1.6385135 | 0.0060948  |
| ENSG00000217128 | FNIP1      | -1.6363172 | 0.02409658 |
| ENSG00000106723 | SPIN1      | -1.6352289 | 0.04870387 |
| ENSG00000143774 | GUK1       | -1.6344216 | 0.04337462 |
| ENSG00000169641 | LUZP1      | -1.6338975 | 0.03185424 |
| ENSG00000269968 | AC006064.4 | -1.6316226 | 0.01882969 |
| ENSG00000122406 | RPL5       | -1.6300295 | 0.02259125 |
| ENSG00000133226 | SRRM1      | -1.6299634 | 0.01882969 |
| ENSG00000114125 | RNF7       | -1.6273242 | 0.03343504 |
| ENSG00000151332 | MBIP       | -1.6225855 | 0.01681343 |
| ENSG00000155508 | CNOT8      | -1.6224458 | 0.03766087 |
| ENSG00000163374 | YY1AP1     | -1.6221834 | 0.02562787 |
| ENSG00000138032 | PPM1B      | -1.613043  | 0.02578823 |
| ENSG00000139572 | GPR84      | -1.6119569 | 0.04491806 |
| ENSG00000091527 | CDV3       | -1.6111565 | 0.00715816 |
| ENSG00000175348 | TMEM9B     | -1.6109897 | 0.01067079 |
| ENSG00000106245 | BUD31      | -1.6072295 | 0.00366462 |
| ENSG00000132334 | PTPRE      | -1.6041146 | 0.01101924 |
| ENSG00000234745 | HLA-B      | -1.6021945 | 0.02302363 |
| ENSG00000006634 | DBF4       | -1.6018116 | 0.0287894  |
| ENSG00000179295 | PTPN11     | -1.6006623 | 0.01017501 |
| ENSG00000156030 | ELMSAN1    | -1.5993026 | 0.00366462 |
| ENSG00000061936 | SFSWAP     | -1.5980879 | 0.03455066 |
| ENSG00000132388 | UBE2G1     | -1.5863168 | 0.00427995 |
| ENSG00000100982 | PCIF1      | -1.586076  | 0.00458777 |
| ENSG00000164032 | H2AFZ      | -1.5829662 | 0.02358364 |
| ENSG00000117523 | PRRC2C     | -1.5823651 | 0.00421696 |
| ENSG00000168615 | ADAM9      | -1.5815231 | 0.04551538 |
| ENSG00000168137 | SETD5      | -1.5803551 | 0.04087958 |
| ENSG00000116752 | BCAS2      | -1.5794338 | 0.04794577 |
| ENSG00000033030 | ZCCHC8     | -1.5790862 | 0.04297077 |
| ENSG00000163624 | CDS1       | -1.5761092 | 0.04870387 |
| ENSG00000119048 | UBE2B      | -1.5728153 | 0.03917306 |
| ENSG00000166747 | AP1G1      | -1.5719046 | 0.0383737  |
| ENSG00000255112 | CHMP1B     | -1.5712458 | 0.04448535 |
| ENSG00000143079 | CTTNBP2NL  | -1.5684593 | 0.01403954 |
| ENSG00000146232 | NFKBIE     | -1.5668712 | 0.02052812 |
| ENSG00000151461 | UPF2       | -1.5632883 | 0.0037268  |

|                 |            |            |            |
|-----------------|------------|------------|------------|
| ENSG00000180596 | HIST1H2BC  | -1.5602294 | 0.023638   |
| ENSG00000054267 | ARID4B     | -1.5600476 | 0.0080564  |
| ENSG00000179094 | PER1       | -1.5596991 | 0.03414375 |
| ENSG00000147604 | RPL7       | -1.5523558 | 0.03067089 |
| ENSG00000056097 | ZFR        | -1.5443294 | 0.02861146 |
| ENSG00000090061 | CCNK       | -1.5435958 | 0.0108102  |
| ENSG00000185043 | CIB1       | -1.5420194 | 0.00526983 |
| ENSG00000177879 | AP3S1      | -1.5417923 | 0.00517546 |
| ENSG00000170889 | RPS9       | -1.5371501 | 0.04672437 |
| ENSG00000145414 | NAF1       | -1.5358676 | 0.00939014 |
| ENSG00000134248 | LAMTOR5    | -1.535767  | 0.01905624 |
| ENSG00000267165 | CHMP1B-AS1 | -1.53324   | 0.03839989 |
| ENSG00000205937 | RNPS1      | -1.531859  | 0.01764812 |
| ENSG00000137955 | RABGGTB    | -1.5311364 | 0.02187734 |
| ENSG00000147526 | TACC1      | -1.5295004 | 0.00817443 |
| ENSG00000271869 | AC026979.3 | -1.5276153 | 0.01698373 |
| ENSG00000144848 | ATG3       | -1.5257477 | 0.02328206 |
| ENSG00000198160 | MIER1      | -1.5249849 | 0.00783832 |
| ENSG00000166266 | CUL5       | -1.5246382 | 0.02315457 |
| ENSG00000138326 | RPS24      | -1.5235435 | 0.0495915  |
| ENSG00000101166 | PRELID3B   | -1.5209207 | 0.01745368 |
| ENSG00000187514 | PTMA       | -1.5196051 | 0.00812086 |
| ENSG00000102409 | BEX4       | -1.5147338 | 0.00366462 |
| ENSG00000204178 | TMEM57     | -1.5111317 | 0.04977237 |
| ENSG00000184014 | DENND5A    | -1.5096529 | 0.0311748  |
| ENSG00000109220 | CHIC2      | -1.5092584 | 0.02274656 |
| ENSG00000143256 | PFDN2      | -1.5092422 | 0.02230772 |
| ENSG00000168036 | CTNNB1     | -1.5081516 | 0.0488667  |
| ENSG00000259884 | AC025259.3 | -1.5079142 | 0.0291451  |
| ENSG00000156735 | BAG4       | -1.507731  | 0.03297477 |
| ENSG00000119844 | AFTPH      | -1.5075552 | 0.0383737  |
| ENSG00000137185 | ZSCAN9     | -1.5056565 | 0.04795835 |
| ENSG00000184922 | FMNL1      | -1.5042614 | 0.00427995 |
| ENSG00000203644 | AC083799.1 | -1.5031031 | 0.00604041 |
| ENSG00000129484 | PARP2      | -1.5019141 | 0.01498374 |
| ENSG00000172062 | SMN1       | -1.5017795 | 0.00809412 |
| ENSG00000114354 | TFG        | -1.5006429 | 0.02308955 |
| ENSG00000090905 | TNRC6A     | -1.5001209 | 0.01786554 |



## DEG Mo pSS versus HD

| <b>Transcript ID</b> | <b>Gene name</b> | <b>Log2(FC)</b> | <b>FDR &lt; 0.05</b> |
|----------------------|------------------|-----------------|----------------------|
| ENSG00000088827      | SIGLEC1          | 4.81222715      | 0.00061969           |
| ENSG00000127951      | FGL2             | 4.63307294      | 3.69E-05             |
| ENSG00000177409      | SAMD9L           | 4.48867916      | 7.2716E-05           |
| ENSG00000111331      | OAS3             | 4.42230211      | 0.00037088           |
| ENSG00000111335      | OAS2             | 4.41241143      | 0.00023971           |
| ENSG00000182578      | CSF1R            | 4.12149732      | 0.00018821           |
| ENSG00000111913      | RIPOR2           | 4.05133531      | 5.6748E-05           |
| ENSG00000204131      | NHSL2            | 3.98423953      | 8.698E-05            |
| ENSG00000089127      | OAS1             | 3.88177349      | 0.00014848           |
| ENSG00000082074      | FYB1             | 3.86940796      | 0.00011131           |
| ENSG00000168329      | CX3CR1           | 3.66901016      | 0.00346942           |
| ENSG00000132530      | XAF1             | 3.57786021      | 0.00019855           |
| ENSG00000137959      | IFI44L           | 3.56620595      | 0.00405956           |
| ENSG00000106780      | MEGF9            | 3.50812058      | 0.00020506           |
| ENSG00000110876      | SELPLG           | 3.45149629      | 3.725E-05            |
| ENSG00000119917      | IFIT3            | 3.41478814      | 0.00578098           |
| ENSG00000157601      | MX1              | 3.40051191      | 0.00273973           |
| ENSG00000093072      | ADA2             | 3.30929409      | 0.00035785           |
| ENSG00000137628      | DDX60            | 3.26174787      | 0.00017728           |
| ENSG00000119922      | IFIT2            | 3.15400711      | 0.00698448           |
| ENSG00000096968      | JAK2             | 3.1171167       | 4.002E-05            |
| ENSG00000183486      | MX2              | 3.0908071       | 0.00012058           |
| ENSG00000203747      | FCGR3A           | 3.05824159      | 0.00908083           |
| ENSG00000185745      | IFIT1            | 3.04472512      | 0.00769807           |
| ENSG00000092964      | DPYSL2           | 3.03157003      | 0.00036453           |
| ENSG00000179583      | CIITA            | 2.97329048      | 3.69E-05             |
| ENSG00000178927      | C17orf62         | 2.95098495      | 0.00011008           |
| ENSG00000146192      | FGD2             | 2.94266455      | 3.69E-05             |
| ENSG00000171115      | GIMAP8           | 2.91127768      | 0.00035769           |
| ENSG00000121858      | TNFSF10          | 2.90815474      | 0.00085748           |
| ENSG00000101347      | SAMHD1           | 2.8875798       | 0.00020568           |
| ENSG00000107551      | RASSF4           | 2.86741339      | 0.00020286           |
| ENSG00000133706      | LARS             | 2.85358246      | 0.00024204           |
| ENSG00000157637      | SLC38A10         | 2.83559968      | 4.0167E-05           |
| ENSG00000105483      | CARD8            | 2.82180872      | 0.00010905           |
| ENSG00000134321      | RSAD2            | 2.8216868       | 0.00044978           |
| ENSG00000166801      | FAM111A          | 2.82114926      | 4.0167E-05           |

|                 |          |            |            |
|-----------------|----------|------------|------------|
| ENSG00000133574 | GIMAP4   | 2.80831292 | 0.00205538 |
| ENSG00000005020 | SKAP2    | 2.80342257 | 0.00011131 |
| ENSG00000107201 | DDX58    | 2.79847046 | 7.6564E-05 |
| ENSG00000139970 | RTN1     | 2.79625262 | 0.00161234 |
| ENSG00000143624 | INTS3    | 2.76935299 | 0.00025431 |
| ENSG00000135218 | CD36     | 2.7687755  | 0.00441468 |
| ENSG00000121807 | CCR2     | 2.76812231 | 0.00459916 |
| ENSG00000134326 | CMPK2    | 2.76441331 | 7.007E-05  |
| ENSG00000124491 | F13A1    | 2.76137384 | 0.0436662  |
| ENSG00000038427 | VCAN     | 2.76089778 | 0.00031344 |
| ENSG00000139278 | GLIPR1   | 2.75148728 | 3.69E-05   |
| ENSG00000188641 | DPYD     | 2.7460871  | 0.00016589 |
| ENSG00000160593 | JAML     | 2.73785141 | 1.5464E-05 |
| ENSG00000129003 | VPS13C   | 2.72450583 | 0.00042793 |
| ENSG00000177575 | CD163    | 2.7119008  | 0.00130504 |
| ENSG00000101336 | HCK      | 2.69647494 | 4.6204E-05 |
| ENSG00000196975 | ANXA4    | 2.68121227 | 0.00013137 |
| ENSG00000143546 | S100A8   | 2.67257265 | 0.00020529 |
| ENSG00000133835 | HSD17B4  | 2.66258299 | 5.2951E-05 |
| ENSG00000103381 | CPPED1   | 2.65717733 | 0.00031447 |
| ENSG00000181381 | DDX60L   | 2.6567232  | 0.00050571 |
| ENSG00000105953 | OGDH     | 2.64511854 | 0.00021448 |
| ENSG00000130449 | ZSWIM6   | 2.63544798 | 7.2413E-05 |
| ENSG00000187608 | ISG15    | 2.62966453 | 0.00010145 |
| ENSG00000165168 | CYBB     | 2.62649243 | 0.00017515 |
| ENSG00000163683 | SMIM14   | 2.584365   | 0.00013629 |
| ENSG00000215458 | AATBC    | 2.57203412 | 5.6247E-05 |
| ENSG00000196209 | SIRPB2   | 2.55920596 | 0.00116963 |
| ENSG00000073849 | ST6GAL1  | 2.550513   | 0.00048075 |
| ENSG00000249437 | NAIP     | 2.54772158 | 0.03856131 |
| ENSG00000138119 | MYOF     | 2.52298352 | 0.00116629 |
| ENSG00000133106 | EPSTI1   | 2.51730507 | 0.00024243 |
| ENSG00000163563 | MNDA     | 2.51154611 | 0.00019527 |
| ENSG00000240065 | PSMB9    | 2.49985703 | 0.00043175 |
| ENSG00000134256 | CD101    | 2.49461745 | 0.00672014 |
| ENSG00000185722 | ANKFY1   | 2.4915029  | 0.00017719 |
| ENSG00000006756 | ARSD     | 2.456905   | 0.00034289 |
| ENSG00000068079 | IFI35    | 2.45084083 | 0.00011131 |
| ENSG00000102524 | TNFSF13B | 2.4295903  | 0.00016701 |
| ENSG00000110665 | C11orf21 | 2.42600156 | 4.3201E-05 |
| ENSG00000142405 | NLRP12   | 2.42233631 | 0.0011604  |
| ENSG00000213203 | GIMAP1   | 2.40060946 | 0.00029261 |

|                 |            |            |            |
|-----------------|------------|------------|------------|
| ENSG00000250138 | AC139495.3 | 2.39948877 | 0.00070469 |
| ENSG00000127954 | STEAP4     | 2.39860441 | 0.02252014 |
| ENSG00000138246 | DNAJC13    | 2.38403223 | 0.00029419 |
| ENSG00000178685 | PARP10     | 2.38363732 | 1.8312E-05 |
| ENSG00000128872 | TMOD2      | 2.38333014 | 0.00011131 |
| ENSG00000163565 | IFI16      | 2.37871911 | 5.9604E-05 |
| ENSG00000165092 | ALDH1A1    | 2.36838002 | 0.00200702 |
| ENSG00000149131 | SERPING1   | 2.36410268 | 0.0017831  |
| ENSG00000100364 | KIAA0930   | 2.3531638  | 7.9831E-05 |
| ENSG00000135636 | DYSF       | 2.35302925 | 0.00056476 |
| ENSG00000126709 | IFI6       | 2.35060464 | 0.00045242 |
| ENSG00000111961 | SASH1      | 2.34814151 | 0.04833761 |
| ENSG00000050344 | NFE2L3     | 2.33003379 | 5.9604E-05 |
| ENSG00000142089 | IFITM3     | 2.32819656 | 0.00076829 |
| ENSG00000146592 | CREB5      | 2.32706132 | 0.00069182 |
| ENSG00000119638 | NEK9       | 2.32309385 | 8.2108E-05 |
| ENSG00000140575 | IQGAP1     | 2.30892835 | 0.00026643 |
| ENSG00000105967 | TFEC       | 2.30676328 | 8.2108E-05 |
| ENSG00000081189 | MEF2C      | 2.29629681 | 0.00037032 |
| ENSG00000142687 | KIAA0319L  | 2.28793993 | 0.0002003  |
| ENSG00000137965 | IFI44      | 2.27380106 | 0.00211031 |
| ENSG00000138413 | IDH1       | 2.27237293 | 0.00056064 |
| ENSG00000168310 | IRF2       | 2.27032454 | 0.00101781 |
| ENSG00000229754 | CXCR2P1    | 2.26268149 | 0.0008627  |
| ENSG00000106785 | TRIM14     | 2.26268053 | 0.00011864 |
| ENSG00000135709 | KIAA0513   | 2.26070245 | 0.00011131 |
| ENSG00000140749 | IGSF6      | 2.25914668 | 0.00110115 |
| ENSG00000188554 | NBR1       | 2.24022924 | 0.00011131 |
| ENSG00000058668 | ATP2B4     | 2.23782734 | 0.00196697 |
| ENSG00000165071 | TMEM71     | 2.22947868 | 0.00013137 |
| ENSG00000175567 | UCP2       | 2.2209786  | 0.00179198 |
| ENSG00000031081 | ARHGAP31   | 2.21924073 | 0.00241362 |
| ENSG00000133943 | DGLUCY     | 2.21857708 | 4.0167E-05 |
| ENSG00000187554 | TLR5       | 2.21767842 | 0.00029084 |
| ENSG00000188404 | SELL       | 2.21406286 | 0.00152087 |
| ENSG00000102189 | EEA1       | 2.21309813 | 0.00046523 |
| ENSG00000180357 | ZNF609     | 2.21122874 | 6.6556E-05 |
| ENSG00000138646 | HERC5      | 2.21122579 | 0.00014889 |
| ENSG00000103313 | MEFV       | 2.20838651 | 0.00024218 |
| ENSG00000139687 | RB1        | 2.20778929 | 9.703E-05  |
| ENSG00000115232 | ITGA4      | 2.1977504  | 0.00066046 |
| ENSG00000081087 | OSTM1      | 2.18697561 | 5.2951E-05 |

|                 |          |            |            |
|-----------------|----------|------------|------------|
| ENSG00000115155 | OTOF     | 2.17916828 | 0.04578118 |
| ENSG00000110077 | MS4A6A   | 2.17144347 | 0.00035769 |
| ENSG00000173821 | RNF213   | 2.16238113 | 0.00043225 |
| ENSG00000198734 | F5       | 2.15850947 | 0.00025416 |
| ENSG00000198951 | NAGA     | 2.1583494  | 0.00023076 |
| ENSG00000150867 | PIP4K2A  | 2.15794943 | 0.00017634 |
| ENSG00000071967 | CYBRD1   | 2.15624005 | 0.00158569 |
| ENSG00000074706 | IPCEF1   | 2.15391304 | 0.00079352 |
| ENSG00000166326 | TRIM44   | 2.15103466 | 0.00011131 |
| ENSG00000121210 | TMEM131L | 2.15055037 | 0.00080531 |
| ENSG00000108771 | DHX58    | 2.12712832 | 0.00088319 |
| ENSG00000112367 | FIG4     | 2.11750045 | 2.6941E-05 |
| ENSG00000165672 | PRDX3    | 2.11413223 | 0.00011131 |
| ENSG00000138756 | BMP2K    | 2.10876117 | 0.00014473 |
| ENSG00000183023 | SLC8A1   | 2.10770505 | 0.00140107 |
| ENSG00000161929 | SCIMP    | 2.10518218 | 0.00054607 |
| ENSG00000082996 | RNF13    | 2.1003053  | 0.00042489 |
| ENSG00000107099 | DOCK8    | 2.09599002 | 0.00042323 |
| ENSG00000025708 | TYMP     | 2.09573646 | 0.00353048 |
| ENSG00000160551 | TAOK1    | 2.0948519  | 0.00031447 |
| ENSG00000163946 | FAM208A  | 2.08670497 | 0.00025562 |
| ENSG00000179144 | GIMAP7   | 2.08182365 | 0.01499835 |
| ENSG00000138496 | PARP9    | 2.07771882 | 0.00058507 |
| ENSG00000135838 | NPL      | 2.07449096 | 0.00096657 |
| ENSG00000173083 | HPSE     | 2.06771702 | 0.00112582 |
| ENSG00000119321 | FKBP15   | 2.06242754 | 0.00027781 |
| ENSG00000166927 | MS4A7    | 2.06134147 | 0.00363434 |
| ENSG00000143970 | ASXL2    | 2.05713821 | 0.0002004  |
| ENSG00000124942 | AHNAK    | 2.05330381 | 0.00037122 |
| ENSG00000145246 | ATP10D   | 2.04835108 | 0.00039682 |
| ENSG00000149311 | ATM      | 2.04810493 | 3.69E-05   |
| ENSG00000165476 | REEP3    | 2.04794403 | 0.0002967  |
| ENSG00000133561 | GIMAP6   | 2.04177072 | 0.00071202 |
| ENSG00000163220 | S100A9   | 2.03585241 | 0.00044987 |
| ENSG00000084733 | RAB10    | 2.03363615 | 0.0001934  |
| ENSG00000197043 | ANXA6    | 2.02891787 | 0.0074927  |
| ENSG00000100342 | APOL1    | 2.02806304 | 0.00710375 |
| ENSG00000088986 | DYNLL1   | 2.02678083 | 3.69E-05   |
| ENSG00000180370 | PAK2     | 2.02592389 | 0.00021444 |
| ENSG00000073969 | NSF      | 2.02382863 | 0.00021098 |
| ENSG00000133313 | CNDP2    | 2.02318759 | 0.00070469 |
| ENSG00000129566 | TEP1     | 2.02316324 | 0.00094714 |

|                 |            |            |            |
|-----------------|------------|------------|------------|
| ENSG00000170006 | TMEM154    | 2.02228185 | 0.00033278 |
| ENSG00000128815 | WDFY4      | 2.01621146 | 0.0007939  |
| ENSG00000280153 | AC133065.6 | 2.01591236 | 0.00098903 |
| ENSG00000130589 | HELZ2      | 2.01531518 | 0.00059211 |
| ENSG00000203710 | CR1        | 2.00968798 | 0.00167253 |
| ENSG00000111269 | CREBL2     | 1.99637291 | 0.0004298  |
| ENSG00000160216 | AGPAT3     | 1.9931901  | 0.00080171 |
| ENSG00000188906 | LRRK2      | 1.99158214 | 0.00021321 |
| ENSG00000168010 | ATG16L2    | 1.99121182 | 0.00011877 |
| ENSG00000040933 | INPP4A     | 1.99048334 | 8.82E-05   |
| ENSG00000186088 | GSAP       | 1.98529176 | 0.00022632 |
| ENSG00000123213 | NLN        | 1.98353142 | 0.01069252 |
| ENSG00000122986 | HVCN1      | 1.98183554 | 0.00017899 |
| ENSG00000135457 | TFCP2      | 1.97973391 | 5.9604E-05 |
| ENSG00000136485 | DCAF7      | 1.97954393 | 0.0003913  |
| ENSG00000065413 | ANKRD44    | 1.97584367 | 3.4895E-05 |
| ENSG00000131374 | TBC1D5     | 1.97247733 | 0.00033575 |
| ENSG00000084070 | SMAP2      | 1.97215259 | 0.00518494 |
| ENSG00000155957 | TMBIM4     | 1.97188602 | 4.9812E-05 |
| ENSG00000169220 | RGS14      | 1.9697004  | 5.9265E-05 |
| ENSG00000104133 | SPG11      | 1.96773469 | 8.698E-05  |
| ENSG00000116237 | ICMT       | 1.96760299 | 5.4121E-05 |
| ENSG00000145416 | MARCH1     | 1.96445135 | 0.00108021 |
| ENSG00000198585 | NUDT16     | 1.96325971 | 0.00025638 |
| ENSG00000153936 | HS2ST1     | 1.96273796 | 5.4121E-05 |
| ENSG00000137752 | CASP1      | 1.95801983 | 0.00041379 |
| ENSG00000133216 | EPHB2      | 1.94999142 | 0.00037151 |
| ENSG00000158517 | NCF1       | 1.9496836  | 0.00084495 |
| ENSG00000197548 | ATG7       | 1.94397589 | 0.00018547 |
| ENSG00000121281 | ADCY7      | 1.93336445 | 0.00041634 |
| ENSG00000170581 | STAT2      | 1.93316979 | 0.00175064 |
| ENSG00000151466 | SCLT1      | 1.93308209 | 0.00075271 |
| ENSG00000145287 | PLAC8      | 1.93174465 | 0.00184434 |
| ENSG00000166888 | STAT6      | 1.93017847 | 0.00051901 |
| ENSG00000136040 | PLXNC1     | 1.92853493 | 0.00025416 |
| ENSG00000156587 | UBE2L6     | 1.92681789 | 0.00130163 |
| ENSG00000122694 | GLIPR2     | 1.92658528 | 0.00020061 |
| ENSG00000226137 | BAIAP2-AS1 | 1.92619115 | 0.00170844 |
| ENSG00000136631 | VPS45      | 1.92511228 | 0.00010269 |
| ENSG00000166272 | WBP1L      | 1.92179463 | 0.00031743 |
| ENSG00000107929 | LARP4B     | 1.91918736 | 0.00013762 |
| ENSG00000090863 | GLG1       | 1.90303374 | 3.69E-05   |

|                  |          |            |            |
|------------------|----------|------------|------------|
| ENSG00000010810  | FYN      | 1.90139286 | 0.00012627 |
| ENSG00000072501  | SMC1A    | 1.90091004 | 0.00024409 |
| ENSG00000093144  | ECHDC1   | 1.90087661 | 0.00020061 |
| ENSG000000155660 | PDIA4    | 1.89991655 | 5.8839E-05 |
| ENSG000000150681 | RGS18    | 1.89711599 | 0.00022322 |
| ENSG000000104974 | LILRA1   | 1.89627793 | 0.00225028 |
| ENSG000000198771 | RCSD1    | 1.89415863 | 0.00013674 |
| ENSG000000105501 | SIGLEC5  | 1.89344721 | 0.0002242  |
| ENSG000000103479 | RBL2     | 1.88225062 | 0.00011163 |
| ENSG00000091106  | NLRC4    | 1.88025166 | 0.00037654 |
| ENSG000000103335 | PIEZO1   | 1.87511955 | 0.00136249 |
| ENSG00000010292  | NCAPD2   | 1.869991   | 0.00013089 |
| ENSG00000008130  | NADK     | 1.86881805 | 0.000305   |
| ENSG000000162946 | DISC1    | 1.86805719 | 0.00253017 |
| ENSG000000138640 | FAM13A   | 1.86643031 | 0.00278912 |
| ENSG000000140090 | SLC24A4  | 1.86540488 | 8.2108E-05 |
| ENSG000000129675 | ARHGEF6  | 1.85487557 | 0.00021321 |
| ENSG000000157827 | FMNL2    | 1.85417167 | 0.00017617 |
| ENSG000000110031 | LPXN     | 1.84675535 | 0.00058189 |
| ENSG000000112419 | PHACTR2  | 1.83062034 | 0.0002053  |
| ENSG000000137478 | FCHSD2   | 1.82957906 | 0.00059545 |
| ENSG00000020577  | SAMD4A   | 1.82723663 | 6.8112E-05 |
| ENSG000000166197 | NOLC1    | 1.82686298 | 0.00019633 |
| ENSG000000181192 | DHTKD1   | 1.82658412 | 0.00095394 |
| ENSG000000164054 | SHISA5   | 1.82575246 | 0.00014848 |
| ENSG000000171853 | TRAPPC12 | 1.82407323 | 0.00038272 |
| ENSG000000134996 | OSTF1    | 1.82067029 | 0.0001277  |
| ENSG000000132182 | NUP210   | 1.81876085 | 0.0006356  |
| ENSG000000184979 | USP18    | 1.81821607 | 0.00018668 |
| ENSG000000154930 | ACSS1    | 1.81709923 | 0.00043615 |
| ENSG000000167220 | HDHD2    | 1.81576718 | 0.0001277  |
| ENSG000000159339 | PADI4    | 1.8129343  | 0.00127516 |
| ENSG000000151702 | FLI1     | 1.81161047 | 0.00062992 |
| ENSG000000250510 | GPR162   | 1.81124772 | 0.00281025 |
| ENSG000000166928 | MS4A14   | 1.80676496 | 0.00387978 |
| ENSG000000213648 | SULT1A4  | 1.80594935 | 0.00220992 |
| ENSG000000177853 | ZNF518A  | 1.80539933 | 0.00031839 |
| ENSG000000145703 | IQGAP2   | 1.80357672 | 0.00900436 |
| ENSG000000120594 | PLXDC2   | 1.79914964 | 0.00207841 |
| ENSG000000121691 | CAT      | 1.79908906 | 0.00030322 |
| ENSG000000132256 | TRIM5    | 1.79834867 | 0.00041435 |
| ENSG00000064763  | FAR2     | 1.79614448 | 0.0001848  |

|                 |            |            |            |
|-----------------|------------|------------|------------|
| ENSG00000197629 | MPEG1      | 1.79410737 | 0.00348206 |
| ENSG00000108389 | MTMR4      | 1.79292546 | 4.0167E-05 |
| ENSG00000258659 | TRIM34     | 1.78714573 | 1.5464E-05 |
| ENSG00000101346 | POFUT1     | 1.78666583 | 0.00019592 |
| ENSG00000263528 | IKBKE      | 1.78215843 | 0.00013089 |
| ENSG00000133816 | MICAL2     | 1.77999999 | 0.00965276 |
| ENSG00000105281 | SLC1A5     | 1.77845426 | 0.00096657 |
| ENSG00000138449 | SLC40A1    | 1.77795244 | 0.00044978 |
| ENSG00000185885 | IFITM1     | 1.77549121 | 0.00195944 |
| ENSG00000164808 | SPIDR      | 1.77402505 | 4.6204E-05 |
| ENSG00000164414 | SLC35A1    | 1.76140878 | 6.077E-05  |
| ENSG00000214078 | CPNE1      | 1.75638232 | 0.0061442  |
| ENSG00000155097 | ATP6V1C1   | 1.75552976 | 6.8996E-05 |
| ENSG00000130150 | MOSPD2     | 1.75525532 | 0.02616316 |
| ENSG00000164062 | APEH       | 1.75516083 | 0.00042376 |
| ENSG00000129993 | CBFA2T3    | 1.75416807 | 0.00034175 |
| ENSG00000196664 | TLR7       | 1.75117674 | 0.03127928 |
| ENSG00000196730 | DAPK1      | 1.74965437 | 0.00305556 |
| ENSG00000145715 | RASA1      | 1.74920879 | 6.4871E-05 |
| ENSG00000250264 | AL669918.1 | 1.74666005 | 0.04869143 |
| ENSG00000001629 | ANKIB1     | 1.7450679  | 4.0167E-05 |
| ENSG00000143669 | LYST       | 1.74377161 | 0.0001798  |
| ENSG00000177119 | ANO6       | 1.73797693 | 4.0167E-05 |
| ENSG00000113845 | TIMMDC1    | 1.73688181 | 0.00023416 |
| ENSG00000108798 | ABI3       | 1.73475905 | 0.0010977  |
| ENSG00000076770 | MBNL3      | 1.73193071 | 7.5228E-05 |
| ENSG00000134955 | SLC37A2    | 1.72948671 | 0.00224493 |
| ENSG00000112079 | STK38      | 1.72691606 | 0.00026307 |
| ENSG00000168995 | SIGLEC7    | 1.72316115 | 0.00234137 |
| ENSG00000174600 | CMKLR1     | 1.72163844 | 0.00172775 |
| ENSG00000142784 | WDTC1      | 1.72084308 | 4.0167E-05 |
| ENSG00000118596 | SLC16A7    | 1.71739468 | 0.00224493 |
| ENSG00000159228 | CBR1       | 1.71678557 | 0.00016348 |
| ENSG00000164308 | ERAP2      | 1.71653322 | 0.03650502 |
| ENSG00000117115 | PADI2      | 1.71315931 | 0.00446116 |
| ENSG00000103196 | CRISPLD2   | 1.71032628 | 0.00540432 |
| ENSG00000198814 | GK         | 1.708838   | 0.0100024  |
| ENSG00000005844 | ITGAL      | 1.70855868 | 0.00248508 |
| ENSG00000136161 | RCBTB2     | 1.70732997 | 0.00050507 |
| ENSG00000165675 | ENOX2      | 1.70371623 | 0.00034874 |
| ENSG00000254838 | GVINP1     | 1.70358337 | 0.00371368 |
| ENSG00000154822 | PLCL2      | 1.70345847 | 0.00242728 |

|                 |            |            |            |
|-----------------|------------|------------|------------|
| ENSG00000280071 | FP565260.6 | 1.6991183  | 0.0033487  |
| ENSG00000138459 | SLC35A5    | 1.69403765 | 0.00018322 |
| ENSG00000198736 | MSRB1      | 1.68859047 | 0.00042489 |
| ENSG00000114770 | ABCC5      | 1.68856034 | 0.00092437 |
| ENSG00000135842 | FAM129A    | 1.68719891 | 0.00173207 |
| ENSG00000178695 | KCTD12     | 1.68715468 | 0.00048075 |
| ENSG00000103544 | C16orf62   | 1.68559026 | 0.00013674 |
| ENSG00000182511 | FES        | 1.68541817 | 0.0003573  |
| ENSG00000165819 | METTL3     | 1.67918653 | 0.00013429 |
| ENSG00000143110 | C1orf162   | 1.67827229 | 0.00036405 |
| ENSG00000136816 | TOR1B      | 1.67818427 | 0.00021444 |
| ENSG00000184992 | BRI3BP     | 1.6780333  | 0.0004298  |
| ENSG00000175538 | KCNE3      | 1.67614598 | 4.3201E-05 |
| ENSG00000101695 | RNF125     | 1.67437375 | 0.00086119 |
| ENSG00000088888 | MAVS       | 1.67434021 | 0.00090564 |
| ENSG00000124357 | NAGK       | 1.67011388 | 0.00078899 |
| ENSG00000077420 | APBB1P     | 1.66646142 | 0.00011229 |
| ENSG00000006715 | VPS41      | 1.6644439  | 0.00014019 |
| ENSG00000089597 | GANAB      | 1.66262829 | 0.00017634 |
| ENSG00000138642 | HERC6      | 1.65949223 | 0.00015833 |
| ENSG00000101307 | SIRPB1     | 1.65722086 | 0.01664438 |
| ENSG00000104365 | IKBKB      | 1.65533587 | 0.00016701 |
| ENSG00000175216 | CKAP5      | 1.65500781 | 0.00116057 |
| ENSG00000166002 | SMCO4      | 1.65376135 | 0.00130388 |
| ENSG00000119457 | SLC46A2    | 1.65167071 | 0.0023381  |
| ENSG00000135899 | SP110      | 1.65130811 | 0.00013089 |
| ENSG00000090861 | AARS       | 1.64939027 | 0.00110912 |
| ENSG00000026652 | AGPAT4     | 1.64716441 | 0.0008941  |
| ENSG00000204261 | PSMB8-AS1  | 1.64527738 | 0.00138063 |
| ENSG00000103047 | TANGO6     | 1.64454838 | 0.00187327 |
| ENSG00000196782 | MAML3      | 1.64105639 | 0.00074128 |
| ENSG00000142185 | TRPM2      | 1.64064032 | 0.00191016 |
| ENSG00000172164 | SNTB1      | 1.63923717 | 0.0017562  |
| ENSG00000087274 | ADD1       | 1.63577739 | 0.00053834 |
| ENSG00000110934 | BIN2       | 1.63492943 | 0.0018027  |
| ENSG00000075303 | SLC25A40   | 1.63413334 | 0.0001277  |
| ENSG00000175309 | PHYKPL     | 1.63396822 | 0.00275355 |
| ENSG00000177628 | GBA        | 1.63228568 | 0.00179412 |
| ENSG00000198133 | TMEM229B   | 1.6321927  | 0.01145874 |
| ENSG00000175471 | MCTP1      | 1.63149672 | 0.00014889 |
| ENSG00000167085 | PHB        | 1.6309904  | 0.00072824 |
| ENSG00000168016 | TRANK1     | 1.63095088 | 0.00080171 |



|                 |            |            |            |
|-----------------|------------|------------|------------|
| ENSG00000119397 | CNTRL      | 1.63015137 | 0.00400993 |
| ENSG00000162704 | ARPC5      | 1.62932633 | 0.00023416 |
| ENSG00000020129 | NCDN       | 1.62621196 | 0.00081608 |
| ENSG00000146776 | ATXN7L1    | 1.62399274 | 0.00026334 |
| ENSG00000197142 | ACSL5      | 1.62105862 | 0.00051346 |
| ENSG00000214013 | GANC       | 1.62065399 | 0.00014848 |
| ENSG00000115415 | STAT1      | 1.62023511 | 0.00431728 |
| ENSG00000099326 | MZF1       | 1.61914023 | 0.00012317 |
| ENSG00000176783 | RUFY1      | 1.61894132 | 0.00059298 |
| ENSG00000163328 | GPR155     | 1.61543313 | 0.00032578 |
| ENSG00000108468 | CBX1       | 1.61471009 | 0.00010905 |
| ENSG00000205133 | TRIQK      | 1.61434355 | 0.00085331 |
| ENSG00000004455 | AK2        | 1.61380087 | 0.00025545 |
| ENSG00000152818 | UTRN       | 1.61190641 | 0.00268679 |
| ENSG00000130021 | PUDP       | 1.6114027  | 3.69E-05   |
| ENSG00000113522 | RAD50      | 1.60816637 | 0.00048893 |
| ENSG00000148110 | MFSD14B    | 1.60660809 | 0.00324543 |
| ENSG00000179921 | GPBAR1     | 1.6060237  | 0.00011774 |
| ENSG00000101337 | TM9SF4     | 1.60519099 | 0.00011131 |
| ENSG00000185482 | STAC3      | 1.60443502 | 0.00015833 |
| ENSG00000130303 | BST2       | 1.60174167 | 0.00075271 |
| ENSG00000112297 | CRYBG1     | 1.59901085 | 0.00026047 |
| ENSG00000086300 | SNX10      | 1.5940843  | 7.5228E-05 |
| ENSG00000179978 | AC140134.1 | 1.59225393 | 0.01034033 |
| ENSG00000134452 | FBXO18     | 1.58838748 | 0.00030322 |
| ENSG00000162869 | PPP1R21    | 1.58588347 | 0.00048075 |
| ENSG00000109436 | TBC1D9     | 1.58441502 | 0.00019192 |
| ENSG00000101974 | ATP11C     | 1.5839431  | 8.4055E-05 |
| ENSG00000186111 | PIP5K1C    | 1.5818681  | 0.00026203 |
| ENSG00000161955 | TNFSF13    | 1.58119351 | 0.00020436 |
| ENSG00000158467 | AHCYL2     | 1.57606659 | 0.00011131 |
| ENSG00000186063 | AIDA       | 1.57409347 | 0.00046529 |
| ENSG00000178537 | SLC25A20   | 1.57353802 | 0.00081597 |
| ENSG00000111667 | USP5       | 1.57295741 | 0.00031694 |
| ENSG00000131844 | MCCC2      | 1.57282243 | 0.0002418  |
| ENSG00000143119 | CD53       | 1.57109935 | 0.00021484 |
| ENSG00000160211 | G6PD       | 1.56978257 | 0.000601   |
| ENSG00000143382 | ADAMTSL4   | 1.56948514 | 0.00264256 |
| ENSG00000070814 | TCOF1      | 1.56868052 | 0.00047455 |
| ENSG00000173193 | PARP14     | 1.56740882 | 0.00445351 |
| ENSG00000180353 | HCLS1      | 1.56664584 | 0.00021343 |
| ENSG00000115904 | SOS1       | 1.56418694 | 0.0009446  |

|                 |           |            |            |
|-----------------|-----------|------------|------------|
| ENSG00000049239 | H6PD      | 1.56086241 | 0.0023701  |
| ENSG00000166145 | SPINT1    | 1.56056375 | 0.00019592 |
| ENSG00000175662 | TOM1L2    | 1.56043927 | 0.00019192 |
| ENSG00000108679 | LGALS3BP  | 1.56029735 | 0.01089084 |
| ENSG00000107736 | CDH23     | 1.5591635  | 0.00195481 |
| ENSG00000058866 | DGKG      | 1.55747451 | 0.00087231 |
| ENSG00000138814 | PPP3CA    | 1.55720597 | 0.00079219 |
| ENSG00000134851 | TMEM165   | 1.55709643 | 3.69E-05   |
| ENSG00000137509 | PRCP      | 1.55445473 | 5.2936E-05 |
| ENSG00000164023 | SGMS2     | 1.54486665 | 0.00023497 |
| ENSG00000070190 | DAPP1     | 1.54042513 | 0.00052724 |
| ENSG00000136305 | CIDEB     | 1.53982943 | 0.00035831 |
| ENSG00000162736 | NCSTN     | 1.53913214 | 0.00014247 |
| ENSG00000160883 | HK3       | 1.53712863 | 0.00139367 |
| ENSG00000146070 | PLA2G7    | 1.53676805 | 0.0003987  |
| ENSG00000100030 | MAPK1     | 1.53661952 | 0.00038097 |
| ENSG00000143933 | CALM2     | 1.53556489 | 0.00061541 |
| ENSG00000173786 | CNP       | 1.53534972 | 0.00189816 |
| ENSG00000117228 | GBP1      | 1.53441652 | 0.02972753 |
| ENSG00000172269 | DPAGT1    | 1.53404302 | 0.00017204 |
| ENSG00000151151 | IPMK      | 1.53347652 | 0.01739805 |
| ENSG00000077380 | DYNC1I2   | 1.53322432 | 0.00032015 |
| ENSG00000100201 | DDX17     | 1.53199949 | 0.00146578 |
| ENSG00000164068 | RNF123    | 1.52989919 | 0.01662566 |
| ENSG00000130429 | ARPC1B    | 1.52804571 | 0.00173207 |
| ENSG00000135905 | DOCK10    | 1.52795493 | 0.00066095 |
| ENSG00000138639 | ARHGAP24  | 1.52793953 | 0.00030893 |
| ENSG00000111540 | RAB5B     | 1.52701183 | 0.00026203 |
| ENSG00000163840 | DTX3L     | 1.52401629 | 0.00057399 |
| ENSG00000164125 | FAM198B   | 1.51862512 | 0.00842223 |
| ENSG00000238227 | TMEM250   | 1.51500264 | 0.00056375 |
| ENSG00000196684 | HSH2D     | 1.51431852 | 5.6748E-05 |
| ENSG00000175857 | GAPT      | 1.5109292  | 0.00103798 |
| ENSG00000160310 | PRMT2     | 1.51058035 | 0.00063722 |
| ENSG00000148484 | RSU1      | 1.50881568 | 0.00104815 |
| ENSG00000131018 | SYNE1     | 1.50740295 | 0.00289354 |
| ENSG00000163154 | TNFAIP8L2 | 1.5067246  | 0.00059557 |
| ENSG00000007923 | DNAJC11   | 1.50596034 | 0.00047624 |
| ENSG00000147471 | PLPBP     | 1.50432034 | 8.2108E-05 |
| ENSG00000146376 | ARHGAP18  | 1.5025789  | 0.00011131 |
| ENSG00000067704 | IARS2     | 1.50016081 | 0.0001848  |
| ENSG00000169429 | CXCL8     | -5.6337326 | 0.00464143 |

|                 |            |            |            |
|-----------------|------------|------------|------------|
| ENSG00000123689 | GOS2       | -5.3324527 | 0.01637209 |
| ENSG00000137801 | THBS1      | -5.2549864 | 0.01454249 |
| ENSG00000148344 | PTGES      | -4.7753901 | 0.00509201 |
| ENSG00000162496 | DHRS3      | -4.498196  | 0.00892293 |
| ENSG00000112137 | PHACTR1    | -4.4357644 | 0.02363157 |
| ENSG00000184205 | TSPYL2     | -4.2134831 | 0.00390017 |
| ENSG00000081041 | CXCL2      | -4.1267357 | 0.01287257 |
| ENSG00000102760 | RGCC       | -4.0251224 | 0.020498   |
| ENSG00000176597 | B3GNT5     | -3.9922784 | 0.00753884 |
| ENSG00000118971 | CCND2      | -3.9763733 | 0.02016236 |
| ENSG00000178726 | THBD       | -3.9694314 | 0.03090869 |
| ENSG00000139112 | GABARAPL1  | -3.9174867 | 0.00344943 |
| ENSG00000163376 | KBTBD8     | -3.7481036 | 0.01002672 |
| ENSG00000160789 | LMNA       | -3.59249   | 0.03524042 |
| ENSG00000100644 | HIF1A      | -3.5458608 | 0.00057401 |
| ENSG00000153207 | AHCTF1     | -3.5254676 | 0.0084494  |
| ENSG00000008083 | JARID2     | -3.3847124 | 0.00115696 |
| ENSG00000182782 | HCAR2      | -3.3290246 | 0.02444392 |
| ENSG00000188042 | ARL4C      | -3.3023161 | 0.03434752 |
| ENSG00000125740 | FOSB       | -3.2798454 | 0.01611739 |
| ENSG00000126351 | THRA       | -3.2650285 | 0.00891857 |
| ENSG00000124145 | SDC4       | -3.261413  | 0.00214841 |
| ENSG00000118985 | ELL2       | -3.2453856 | 0.03585554 |
| ENSG00000113369 | ARRDC3     | -3.2098649 | 0.0063002  |
| ENSG00000171604 | CXXC5      | -3.2020789 | 0.0162197  |
| ENSG00000113448 | PDE4D      | -3.1957399 | 0.02085715 |
| ENSG00000169508 | GPR183     | -3.1681931 | 0.00722174 |
| ENSG00000277117 | FP565260.3 | -3.1326512 | 0.00510494 |
| ENSG00000166920 | C15orf48   | -3.1238849 | 0.01391301 |
| ENSG00000153234 | NR4A2      | -3.1148471 | 0.00604553 |
| ENSG00000078804 | TP53INP2   | -3.1113741 | 0.00575271 |
| ENSG00000168036 | CTNNB1     | -3.1044079 | 0.00037088 |
| ENSG00000130340 | SNX9       | -3.0836264 | 0.00821045 |
| ENSG00000110046 | ATG2A      | -3.082018  | 0.00672133 |
| ENSG00000255398 | HCAR3      | -3.0667303 | 0.00655629 |
| ENSG00000088826 | SMOX       | -3.0513615 | 0.00168846 |
| ENSG00000008056 | SYN1       | -3.017608  | 0.00202534 |
| ENSG00000151014 | NOCT       | -3.0104672 | 0.0001848  |
| ENSG00000196878 | LAMB3      | -2.9950369 | 0.03525671 |
| ENSG00000120063 | GNA13      | -2.9950306 | 0.00263842 |
| ENSG00000165029 | ABCA1      | -2.9948132 | 0.00923629 |
| ENSG00000231721 | LINC-PINT  | -2.9796939 | 0.00123023 |

|                 |            |            |            |
|-----------------|------------|------------|------------|
| ENSG00000112715 | VEGFA      | -2.9746894 | 0.00734878 |
| ENSG00000173575 | CHD2       | -2.9705471 | 0.0001277  |
| ENSG00000113070 | HBEGF      | -2.9627795 | 0.00106234 |
| ENSG00000169155 | ZBTB43     | -2.9596239 | 0.00175002 |
| ENSG00000137507 | LRRC32     | -2.9517331 | 0.00049759 |
| ENSG00000106089 | STX1A      | -2.9492251 | 0.01038173 |
| ENSG00000104312 | RIPK2      | -2.9480134 | 5.2951E-05 |
| ENSG00000075426 | FOSL2      | -2.9416515 | 0.0194375  |
| ENSG00000171174 | RBKS       | -2.9359671 | 0.0252909  |
| ENSG00000271614 | ATP2B1-AS1 | -2.9328893 | 0.0007034  |
| ENSG00000173281 | PPP1R3B    | -2.9287612 | 0.03212843 |
| ENSG00000185477 | GPRIN3     | -2.9252603 | 0.0011287  |
| ENSG00000185022 | MAFF       | -2.9154679 | 0.03122127 |
| ENSG00000128271 | ADORA2A    | -2.9125523 | 0.00079208 |
| ENSG00000155252 | PI4K2A     | -2.9113472 | 0.00361432 |
| ENSG00000070961 | ATP2B1     | -2.8902578 | 0.03972003 |
| ENSG00000113742 | CPEB4      | -2.8816276 | 0.01257684 |
| ENSG00000160223 | ICOSLG     | -2.8795385 | 0.00645006 |
| ENSG00000184588 | PDE4B      | -2.8711138 | 0.00128813 |
| ENSG00000244242 | IFITM10    | -2.870418  | 0.00188837 |
| ENSG00000180530 | NRIP1      | -2.8643287 | 0.00170163 |
| ENSG00000166949 | SMAD3      | -2.8640214 | 0.00335679 |
| ENSG00000134070 | IRAK2      | -2.8624185 | 0.01250651 |
| ENSG00000099985 | OSM        | -2.8597775 | 0.00029425 |
| ENSG00000144476 | ACKR3      | -2.8573954 | 0.00741895 |
| ENSG00000086062 | B4GALT1    | -2.8457697 | 0.00096056 |
| ENSG00000160271 | RALGDS     | -2.8352271 | 0.00840216 |
| ENSG00000161921 | CXCL16     | -2.8324701 | 0.00334081 |
| ENSG00000108828 | VAT1       | -2.8268836 | 0.00453696 |
| ENSG00000134531 | EMP1       | -2.7956852 | 0.0093593  |
| ENSG00000112149 | CD83       | -2.7844651 | 0.00630094 |
| ENSG00000132819 | RBM38      | -2.7792212 | 0.00700209 |
| ENSG00000108179 | PPIF       | -2.7523932 | 0.01740293 |
| ENSG00000133657 | ATP13A3    | -2.7405907 | 0.00591523 |
| ENSG00000128342 | LIF        | -2.725365  | 0.02156661 |
| ENSG00000183696 | UPP1       | -2.7206894 | 3.816E-06  |
| ENSG00000011422 | PLAUR      | -2.7006523 | 0.01328449 |
| ENSG00000198742 | SMURF1     | -2.6925219 | 0.00011131 |
| ENSG00000115548 | KDM3A      | -2.6723105 | 0.00034172 |
| ENSG00000122644 | ARL4A      | -2.667149  | 0.00045749 |
| ENSG00000116604 | MEF2D      | -2.6511897 | 0.01193626 |
| ENSG00000143622 | RIT1       | -2.6418557 | 0.01017276 |

|                 |            |            |            |
|-----------------|------------|------------|------------|
| ENSG00000133639 | BTG1       | -2.6096684 | 0.00691552 |
| ENSG00000057657 | PRDM1      | -2.5991526 | 0.00025626 |
| ENSG00000105835 | NAMPT      | -2.5885866 | 0.01033927 |
| ENSG00000161835 | GRASP      | -2.5845808 | 0.0444488  |
| ENSG00000139572 | GPR84      | -2.5804233 | 0.03542708 |
| ENSG00000060558 | GNA15      | -2.5766184 | 0.014623   |
| ENSG00000059804 | SLC2A3     | -2.5444028 | 0.00359548 |
| ENSG00000140332 | TLE3       | -2.5403499 | 0.00424621 |
| ENSG00000137309 | HMGA1      | -2.5322661 | 0.00031626 |
| ENSG00000234290 | AC116366.1 | -2.5197718 | 0.03965652 |
| ENSG00000055483 | USP36      | -2.5173927 | 0.00376868 |
| ENSG00000095794 | CREM       | -2.5126091 | 0.02652157 |
| ENSG00000162711 | NLRP3      | -2.5091521 | 0.00029457 |
| ENSG00000025156 | HSF2       | -2.4950352 | 0.00038666 |
| ENSG00000170525 | PFKFB3     | -2.4903444 | 4.0167E-05 |
| ENSG00000132952 | USPL1      | -2.4856584 | 0.00113974 |
| ENSG00000189067 | LITAF      | -2.4772791 | 0.02578617 |
| ENSG00000153094 | BCL2L11    | -2.4749415 | 0.00351515 |
| ENSG00000162889 | MAPKAPK2   | -2.4565655 | 0.00581231 |
| ENSG00000130202 | NECTIN2    | -2.4542862 | 0.03099256 |
| ENSG00000153922 | CHD1       | -2.4384453 | 0.000185   |
| ENSG00000162772 | ATF3       | -2.4341496 | 0.00106477 |
| ENSG00000137409 | MTCH1      | -2.4266198 | 0.00096657 |
| ENSG00000004660 | CAMKK1     | -2.4208654 | 0.00010145 |
| ENSG00000211445 | GPX3       | -2.4189819 | 0.02016236 |
| ENSG00000239305 | RNF103     | -2.4170593 | 1.2095E-05 |
| ENSG00000121966 | CXCR4      | -2.4156745 | 0.00711902 |
| ENSG00000141503 | MINK1      | -2.4153969 | 0.00443835 |
| ENSG00000177426 | TGIF1      | -2.4146208 | 0.00170844 |
| ENSG00000085117 | CD82       | -2.4142602 | 0.00082171 |
| ENSG00000120705 | ETF1       | -2.4137603 | 0.00115407 |
| ENSG00000143862 | ARL8A      | -2.4017085 | 0.00690308 |
| ENSG00000154640 | BTG3       | -2.3777685 | 0.00037088 |
| ENSG00000110721 | CHKA       | -2.3690688 | 0.00280401 |
| ENSG00000175352 | NRIP3      | -2.3658043 | 0.00702715 |
| ENSG00000104419 | NDRG1      | -2.3649559 | 0.00786721 |
| ENSG00000166579 | NDEL1      | -2.3578224 | 0.00828844 |
| ENSG00000105851 | PIK3CG     | -2.3529044 | 0.00109512 |
| ENSG00000144597 | EAF1       | -2.3476008 | 0.00638678 |
| ENSG00000158470 | B4GALT5    | -2.3460849 | 0.00018367 |
| ENSG00000153201 | RANBP2     | -2.3460562 | 0.00176715 |
| ENSG00000116574 | RHOU       | -2.3456583 | 0.00530599 |

|                 |           |            |            |
|-----------------|-----------|------------|------------|
| ENSG00000143153 | ATP1B1    | -2.3436801 | 0.00077849 |
| ENSG00000136603 | SKIL      | -2.3399632 | 0.01964359 |
| ENSG00000112511 | PHF1      | -2.3395331 | 0.00017634 |
| ENSG00000177374 | HIC1      | -2.3365351 | 0.04264038 |
| ENSG00000130024 | PHF10     | -2.3349711 | 0.00376857 |
| ENSG00000179361 | ARID3B    | -2.3322307 | 0.00836551 |
| ENSG00000143851 | PTPN7     | -2.3311657 | 0.00019919 |
| ENSG00000272888 | LINC01578 | -2.3298954 | 0.00039024 |
| ENSG00000146457 | WTAP      | -2.329158  | 0.00024688 |
| ENSG00000204178 | TMEM57    | -2.3207445 | 0.00024688 |
| ENSG00000182831 | C16orf72  | -2.3189323 | 0.00687232 |
| ENSG00000165233 | CARD19    | -2.3086297 | 0.00512586 |
| ENSG00000070808 | CAMK2A    | -2.3083899 | 0.02065956 |
| ENSG00000166747 | AP1G1     | -2.3035702 | 3.2365E-05 |
| ENSG00000158882 | TOMM40L   | -2.3034862 | 0.00333586 |
| ENSG00000173812 | EIF1      | -2.2977993 | 5.2951E-05 |
| ENSG00000173334 | TRIB1     | -2.289118  | 0.00037874 |
| ENSG00000161714 | PLCD3     | -2.2762185 | 0.00120954 |
| ENSG00000110042 | DTX4      | -2.2758733 | 0.01231379 |
| ENSG00000103966 | EHD4      | -2.2706792 | 0.00220767 |
| ENSG00000256235 | SMIM3     | -2.2670807 | 0.00633024 |
| ENSG00000137331 | IER3      | -2.2625199 | 9.7018E-05 |
| ENSG00000186594 | MIR22HG   | -2.2617682 | 0.01271882 |
| ENSG00000147872 | PLIN2     | -2.2604177 | 0.01529729 |
| ENSG00000135094 | SDS       | -2.2587265 | 0.00393322 |
| ENSG00000154710 | RABGEF1   | -2.2579161 | 0.00573577 |
| ENSG00000147454 | SLC25A37  | -2.2524847 | 0.00808829 |
| ENSG00000054967 | RELT      | -2.2509272 | 0.00401152 |
| ENSG00000131669 | NINJ1     | -2.2499543 | 0.00217054 |
| ENSG00000182149 | IST1      | -2.2486295 | 0.00016228 |
| ENSG00000015568 | RGPD5     | -2.2473691 | 0.02185054 |
| ENSG00000136717 | BIN1      | -2.2422262 | 0.00011131 |
| ENSG00000213923 | CSNK1E    | -2.2412193 | 0.00076375 |
| ENSG00000005379 | TSPOAP1   | -2.2345228 | 0.02347435 |
| ENSG00000164211 | STARD4    | -2.2336266 | 0.01070554 |
| ENSG00000165804 | ZNF219    | -2.2328169 | 0.00045548 |
| ENSG00000175606 | TMEM70    | -2.2287584 | 0.04537919 |
| ENSG00000182957 | SPATA13   | -2.2211987 | 0.00342977 |
| ENSG00000164056 | SPRY1     | -2.2195278 | 0.01833939 |
| ENSG00000164715 | LMTK2     | -2.2135726 | 0.00079208 |
| ENSG00000090339 | ICAM1     | -2.2057344 | 0.00461745 |
| ENSG00000174437 | ATP2A2    | -2.2038848 | 0.00111639 |

|                 |            |            |            |
|-----------------|------------|------------|------------|
| ENSG00000068878 | PSME4      | -2.2033136 | 0.00114568 |
| ENSG00000109066 | TMEM104    | -2.1988191 | 0.00428046 |
| ENSG00000141506 | PIK3R5     | -2.1952702 | 0.00129345 |
| ENSG00000121671 | CRY2       | -2.1947757 | 0.03182714 |
| ENSG00000165006 | UBAP1      | -2.1913766 | 4.6415E-05 |
| ENSG00000086666 | ZFAND6     | -2.1889773 | 0.00018529 |
| ENSG00000136732 | GYPC       | -2.1856152 | 0.00024683 |
| ENSG00000213639 | PPP1CB     | -2.1835705 | 0.00348599 |
| ENSG00000152102 | FAM168B    | -2.1803401 | 0.00888977 |
| ENSG00000116679 | IVNS1ABP   | -2.1759616 | 0.03850762 |
| ENSG00000170989 | S1PR1      | -2.1745131 | 0.01271455 |
| ENSG00000106546 | AHR        | -2.1643124 | 0.00319666 |
| ENSG00000105722 | ERF        | -2.1626278 | 0.00134062 |
| ENSG00000124198 | ARFGEF2    | -2.1572501 | 0.00049702 |
| ENSG00000166128 | RAB8B      | -2.1568523 | 0.00023416 |
| ENSG00000270681 | AC095055.1 | -2.1564927 | 0.00334425 |
| ENSG00000057704 | TMCC3      | -2.155854  | 0.03222085 |
| ENSG00000204977 | TRIM13     | -2.1521171 | 0.00013559 |
| ENSG00000169629 | RGPD8      | -2.1506083 | 0.02394401 |
| ENSG00000169251 | NMD3       | -2.1366503 | 0.0000369  |
| ENSG00000107968 | MAP3K8     | -2.1358555 | 0.01085837 |
| ENSG00000101782 | RIOK3      | -2.1322235 | 0.00026591 |
| ENSG00000155307 | SAMSN1     | -2.1298181 | 0.03896169 |
| ENSG00000106635 | BCL7B      | -2.1270893 | 0.00016228 |
| ENSG00000173848 | NET1       | -2.1189954 | 0.00079537 |
| ENSG00000197170 | PSMD12     | -2.1151412 | 0.00032825 |
| ENSG00000119950 | MXI1       | -2.1135775 | 0.02516512 |
| ENSG00000114784 | EIF1B      | -2.1078115 | 0.00079091 |
| ENSG00000110047 | EHD1       | -2.1013485 | 0.00697519 |
| ENSG00000152484 | USP12      | -2.1003625 | 0.00089264 |
| ENSG00000183876 | ARSI       | -2.099386  | 0.0013479  |
| ENSG00000166839 | ANKDD1A    | -2.099097  | 0.01754524 |
| ENSG00000117000 | RLF        | -2.0980237 | 0.00075679 |
| ENSG00000175130 | MARCKSL1   | -2.0916263 | 0.00105513 |
| ENSG00000103365 | GGA2       | -2.0901133 | 0.00121006 |
| ENSG00000102034 | ELF4       | -2.0898317 | 0.00326607 |
| ENSG00000173846 | PLK3       | -2.0895813 | 0.00113894 |
| ENSG00000110848 | CD69       | -2.0733829 | 0.01675735 |
| ENSG00000168264 | IRF2BP2    | -2.071314  | 0.0026279  |
| ENSG00000122877 | EGR2       | -2.0695338 | 0.00800203 |
| ENSG00000110367 | DDX6       | -2.0645479 | 0.00088717 |
| ENSG00000078269 | SYNJ2      | -2.0629506 | 0.02118512 |

|                 |            |            |            |
|-----------------|------------|------------|------------|
| ENSG00000263020 | AL662899.2 | -2.0572586 | 0.04147729 |
| ENSG00000102265 | TIMP1      | -2.0567885 | 0.00349848 |
| ENSG00000100614 | PPM1A      | -2.0557918 | 8.4055E-05 |
| ENSG00000177706 | FAM20C     | -2.0534868 | 0.028623   |
| ENSG00000126705 | AHDC1      | -2.0525454 | 0.01052401 |
| ENSG00000125733 | TRIP10     | -2.0485752 | 0.01502992 |
| ENSG00000198805 | PNP        | -2.0454355 | 0.03460549 |
| ENSG00000186431 | FCAR       | -2.0449644 | 0.03493191 |
| ENSG00000145675 | PIK3R1     | -2.0436209 | 0.0444155  |
| ENSG00000145632 | PLK2       | -2.0431337 | 0.03173833 |
| ENSG00000149115 | TNKS1BP1   | -2.0344923 | 0.00977956 |
| ENSG00000020633 | RUNX3      | -2.0304191 | 0.00303617 |
| ENSG00000132326 | PER2       | -2.0278655 | 0.00143466 |
| ENSG00000135404 | CD63       | -2.0257583 | 0.00303568 |
| ENSG00000155304 | HSPA13     | -2.0245682 | 0.00124066 |
| ENSG00000171316 | CHD7       | -2.0198256 | 0.0001798  |
| ENSG00000116786 | PLEKHM2    | -2.0185337 | 0.00365448 |
| ENSG00000101413 | RPRD1B     | -2.0152206 | 0.00032015 |
| ENSG00000173744 | AGFG1      | -2.0128491 | 0.00367787 |
| ENSG00000171867 | PRNP       | -2.008113  | 0.00149954 |
| ENSG00000153914 | SREK1      | -2.0060482 | 0.00187327 |
| ENSG00000185650 | ZFP36L1    | -2.0056671 | 0.01145874 |
| ENSG00000186174 | BCL9L      | -2.002974  | 0.01942106 |
| ENSG00000168214 | RBPJ       | -2.0013176 | 0.00293188 |
| ENSG00000023287 | RB1CC1     | -1.9931023 | 0.00702366 |
| ENSG00000132661 | NXT1       | -1.9919591 | 0.04292691 |
| ENSG00000204160 | ZDHHC18    | -1.9917883 | 0.00149954 |
| ENSG00000172071 | EIF2AK3    | -1.9917504 | 0.00253835 |
| ENSG00000153066 | TXNDC11    | -1.9897945 | 0.00119443 |
| ENSG00000176845 | METRNL     | -1.9892546 | 0.0068429  |
| ENSG00000186660 | ZFP91      | -1.9889859 | 0.0000369  |
| ENSG00000069956 | MAPK6      | -1.9881321 | 0.00203372 |
| ENSG00000107816 | LZTS2      | -1.9862474 | 0.00036847 |
| ENSG00000123091 | RNF11      | -1.9860266 | 2.4517E-05 |
| ENSG00000196923 | PDLIM7     | -1.9855536 | 0.00080795 |
| ENSG00000033327 | GAB2       | -1.9828257 | 0.00425917 |
| ENSG00000139832 | RAB20      | -1.9828184 | 0.00775912 |
| ENSG00000174738 | NR1D2      | -1.9794011 | 0.00432981 |
| ENSG00000186642 | PDE2A      | -1.9782233 | 0.02931326 |
| ENSG00000198900 | TOP1       | -1.9740894 | 0.0079006  |
| ENSG00000145241 | CENPC      | -1.9740236 | 0.00061876 |
| ENSG00000107554 | DNMBP      | -1.9723214 | 0.01715119 |



|                 |            |            |            |
|-----------------|------------|------------|------------|
| ENSG00000183735 | TBK1       | -1.9713113 | 1.8312E-05 |
| ENSG00000100083 | GGA1       | -1.9684336 | 0.0001054  |
| ENSG00000165030 | NFIL3      | -1.9683506 | 0.0001798  |
| ENSG00000163877 | SNIP1      | -1.9677867 | 0.00134844 |
| ENSG00000110713 | NUP98      | -1.9636771 | 0.00253039 |
| ENSG00000125812 | GZF1       | -1.9620554 | 0.02372848 |
| ENSG00000110852 | CLEC2B     | -1.9618504 | 0.00497045 |
| ENSG00000165424 | ZCCHC24    | -1.9606687 | 0.00861902 |
| ENSG00000118515 | SGK1       | -1.9587755 | 0.03928864 |
| ENSG00000111641 | NOP2       | -1.9578295 | 0.030491   |
| ENSG00000126368 | NR1D1      | -1.9572148 | 0.01145314 |
| ENSG00000117139 | KDM5B      | -1.9569944 | 0.00217905 |
| ENSG00000134107 | BHLHE40    | -1.9566723 | 0.01264053 |
| ENSG00000111615 | KRR1       | -1.954116  | 0.0008326  |
| ENSG00000280138 | AC027290.2 | -1.9507009 | 0.00039116 |
| ENSG00000083799 | CYLD       | -1.950076  | 0.00022505 |
| ENSG00000137166 | FOXP4      | -1.949993  | 0.00140031 |
| ENSG00000145780 | FEM1C      | -1.9471062 | 0.00023497 |
| ENSG00000082153 | BZW1       | -1.9431389 | 0.01711668 |
| ENSG00000107863 | ARHGAP21   | -1.9402569 | 6.1348E-05 |
| ENSG00000036054 | TBC1D23    | -1.9309444 | 0.00022218 |
| ENSG00000133789 | SWAP70     | -1.9304165 | 0.00333076 |
| ENSG00000123360 | PDE1B      | -1.9295376 | 0.00186871 |
| ENSG00000186918 | ZNF395     | -1.9273649 | 0.00392283 |
| ENSG00000125772 | GPCPD1     | -1.9239971 | 0.00387853 |
| ENSG00000170638 | TRABD      | -1.9202134 | 0.00016159 |
| ENSG00000083896 | YTHDC1     | -1.9190759 | 8.2108E-05 |
| ENSG00000064012 | CASP8      | -1.912928  | 0.00168434 |
| ENSG00000184216 | IRAK1      | -1.9121738 | 0.01178924 |
| ENSG00000253276 | CCDC71L    | -1.911114  | 0.00254656 |
| ENSG00000099381 | SETD1A     | -1.9071814 | 0.02676969 |
| ENSG00000162924 | REL        | -1.9040934 | 3.2365E-05 |
| ENSG00000154978 | VOPP1      | -1.9028077 | 0.01537657 |
| ENSG00000055609 | KMT2C      | -1.8989444 | 0.02105759 |
| ENSG00000160741 | CRTC2      | -1.8987936 | 0.0002735  |
| ENSG00000240849 | TMEM189    | -1.8954654 | 0.01891436 |
| ENSG00000196233 | LCOR       | -1.8941411 | 0.00006077 |
| ENSG00000079332 | SAR1A      | -1.8930478 | 0.00037122 |
| ENSG00000019995 | ZRANB1     | -1.8898784 | 0.00046556 |
| ENSG00000109113 | RAB34      | -1.8894695 | 0.0012744  |
| ENSG00000101558 | VAPA       | -1.8860457 | 0.04326385 |
| ENSG00000101421 | CHMP4B     | -1.8811711 | 0.00179355 |

|                 |          |            |            |
|-----------------|----------|------------|------------|
| ENSG00000163785 | RYK      | -1.8750924 | 0.00092722 |
| ENSG00000272886 | DCP1A    | -1.8731265 | 0.00157429 |
| ENSG00000118689 | FOXO3    | -1.8706899 | 0.00959379 |
| ENSG00000121749 | TBC1D15  | -1.8704506 | 0.00049264 |
| ENSG00000196843 | ARID5A   | -1.8689803 | 0.00450279 |
| ENSG00000211459 | MT-RNR1  | -1.8644215 | 0.00135837 |
| ENSG00000173276 | ZBTB21   | -1.8617309 | 0.00147052 |
| ENSG00000181045 | SLC26A11 | -1.8598453 | 0.01978584 |
| ENSG00000112406 | HECA     | -1.8598173 | 0.00092214 |
| ENSG00000105656 | ELL      | -1.8583687 | 0.00732956 |
| ENSG00000112282 | MED23    | -1.8571229 | 0.00162936 |
| ENSG00000138166 | DUSP5    | -1.8569247 | 0.00086712 |
| ENSG00000169762 | TAPT1    | -1.8516965 | 0.0003077  |
| ENSG00000163050 | COQ8A    | -1.8501052 | 0.00675146 |
| ENSG00000126775 | ATG14    | -1.8468722 | 0.00024848 |
| ENSG00000132912 | DCTN4    | -1.8468371 | 0.00010145 |
| ENSG00000100284 | TOM1     | -1.846443  | 0.00153216 |
| ENSG00000167996 | FTH1     | -1.8459891 | 0.00235438 |
| ENSG00000023734 | STRAP    | -1.8458261 | 0.0000369  |
| ENSG00000183955 | KMT5A    | -1.8436599 | 0.00498639 |
| ENSG00000186834 | HEXIM1   | -1.8421121 | 0.00571373 |
| ENSG00000166165 | CKB      | -1.8411489 | 0.00802101 |
| ENSG00000065809 | FAM107B  | -1.8409382 | 0.00187327 |
| ENSG00000198853 | RUSC2    | -1.8374819 | 0.00601804 |
| ENSG00000160570 | DEDD2    | -1.8355286 | 0.00329172 |
| ENSG00000181220 | ZNF746   | -1.8354554 | 0.00622101 |
| ENSG00000008952 | SEC62    | -1.8310351 | 0.00041379 |
| ENSG00000169967 | MAP3K2   | -1.8276966 | 0.01488026 |
| ENSG00000258890 | CEP95    | -1.8171787 | 0.00297137 |
| ENSG00000167491 | GATAD2A  | -1.8153259 | 0.00293188 |
| ENSG00000122068 | FYTTD1   | -1.8128755 | 0.0002456  |
| ENSG00000132155 | RAF1     | -1.8089564 | 0.00063722 |
| ENSG00000168438 | CDC40    | -1.8080239 | 0.00339332 |
| ENSG00000255112 | CHMP1B   | -1.8052809 | 0.00601804 |
| ENSG00000140564 | FURIN    | -1.7987076 | 0.01662645 |
| ENSG00000140941 | MAP1LC3B | -1.7985835 | 0.00108044 |
| ENSG00000156650 | KAT6B    | -1.7985556 | 0.00043898 |
| ENSG00000103657 | HERC1    | -1.7963983 | 0.00025626 |
| ENSG00000132510 | KDM6B    | -1.795885  | 0.0001275  |
| ENSG00000176624 | MEX3C    | -1.7956592 | 0.00010911 |
| ENSG00000104081 | BMF      | -1.7933229 | 0.0037225  |
| ENSG00000101544 | ADNP2    | -1.7924296 | 0.00071567 |

|                 |            |            |            |
|-----------------|------------|------------|------------|
| ENSG00000047634 | SCML1      | -1.7920938 | 0.00018529 |
| ENSG00000196396 | PTPN1      | -1.7911115 | 0.00848506 |
| ENSG00000101216 | GMEB2      | -1.7898481 | 0.00651799 |
| ENSG00000170677 | SOCS6      | -1.7869862 | 0.01133185 |
| ENSG00000106723 | SPIN1      | -1.786127  | 0.00392897 |
| ENSG00000138069 | RAB1A      | -1.7825402 | 0.0046341  |
| ENSG00000141580 | WDR45B     | -1.7784459 | 0.00614734 |
| ENSG00000139725 | RHOF       | -1.7777834 | 0.00807752 |
| ENSG00000126524 | SBDS       | -1.7750369 | 0.00087231 |
| ENSG00000183431 | SF3A3      | -1.7741834 | 0.0004242  |
| ENSG00000164687 | FABP5      | -1.772035  | 0.00229042 |
| ENSG00000162664 | ZNF326     | -1.7703503 | 0.00016166 |
| ENSG00000164442 | CITED2     | -1.7700743 | 0.00254922 |
| ENSG00000144655 | CSRNP1     | -1.7700244 | 0.01231379 |
| ENSG00000160408 | ST6GALNAC6 | -1.7689971 | 0.00179958 |
| ENSG00000109118 | PHF12      | -1.7661587 | 0.00072397 |
| ENSG00000106346 | USP42      | -1.7657116 | 0.00231527 |
| ENSG00000102984 | ZNF821     | -1.7654559 | 0.00205786 |
| ENSG00000101384 | JAG1       | -1.7652708 | 0.00023497 |
| ENSG00000132334 | PTPRE      | -1.7617087 | 0.00829848 |
| ENSG00000100425 | BRD1       | -1.7605867 | 0.0001505  |
| ENSG00000127838 | PNKD       | -1.7604756 | 0.03950871 |
| ENSG00000178127 | NDUFV2     | -1.7603756 | 0.00073001 |
| ENSG00000164823 | OSGIN2     | -1.753502  | 0.00033773 |
| ENSG00000124762 | CDKN1A     | -1.7524954 | 0.00250115 |
| ENSG00000197183 | NOL4L      | -1.749076  | 0.02292124 |
| ENSG00000104885 | DOT1L      | -1.7490404 | 0.00170844 |
| ENSG00000156860 | FBRS       | -1.749037  | 0.0011299  |
| ENSG00000178789 | CD300LB    | -1.7414884 | 0.02436108 |
| ENSG00000242125 | SNHG3      | -1.7411488 | 0.00077068 |
| ENSG00000072274 | TFRC       | -1.7400163 | 0.04603645 |
| ENSG00000027697 | IFNGR1     | -1.7393537 | 0.0136665  |
| ENSG00000183484 | GPR132     | -1.7384703 | 0.00125237 |
| ENSG00000146872 | TLK2       | -1.738412  | 0.00011229 |
| ENSG00000139697 | SBNO1      | -1.7374031 | 0.00493368 |
| ENSG00000175556 | LONRF3     | -1.7374001 | 7.6536E-05 |
| ENSG00000131051 | RBM39      | -1.7358744 | 0.00069566 |
| ENSG00000090924 | PLEKHG2    | -1.7317967 | 0.00258906 |
| ENSG00000114796 | KLHL24     | -1.7293225 | 0.0001253  |
| ENSG00000268734 | AC245128.3 | -1.7288244 | 0.03527874 |
| ENSG00000159461 | AMFR       | -1.7251031 | 0.00459037 |
| ENSG00000134815 | DHX34      | -1.7200533 | 0.00094463 |

|                 |            |            |            |
|-----------------|------------|------------|------------|
| ENSG00000106004 | HOXA5      | -1.7157683 | 0.01131822 |
| ENSG00000174574 | AKIRIN1    | -1.7154807 | 0.00059211 |
| ENSG00000100100 | PIK3IP1    | -1.7144539 | 0.00698448 |
| ENSG00000119801 | YPEL5      | -1.7132154 | 0.0001146  |
| ENSG00000138593 | SECISBP2L  | -1.7125599 | 0.00014906 |
| ENSG00000183337 | BCOR       | -1.7104719 | 0.0451965  |
| ENSG00000080371 | RAB21      | -1.7089091 | 0.00018222 |
| ENSG00000008294 | SPAG9      | -1.7086175 | 0.00105353 |
| ENSG00000076924 | XAB2       | -1.7069058 | 0.00044978 |
| ENSG00000145495 | 38777      | -1.7043489 | 0.0003874  |
| ENSG00000140367 | UBE2Q2     | -1.7043335 | 0.00029716 |
| ENSG00000177169 | ULK1       | -1.701854  | 6.3157E-05 |
| ENSG00000164327 | RICTOR     | -1.7017626 | 0.00133432 |
| ENSG00000163697 | APBB2      | -1.7010362 | 0.02373579 |
| ENSG00000150593 | PDCD4      | -1.7007338 | 0.00040152 |
| ENSG00000036257 | CUL3       | -1.7001997 | 0.00072261 |
| ENSG00000196428 | TSC22D2    | -1.6986638 | 0.00068123 |
| ENSG00000143217 | NECTIN4    | -1.698404  | 0.00022322 |
| ENSG00000213722 | DDAH2      | -1.6968848 | 0.0022176  |
| ENSG00000155926 | SLA        | -1.6968623 | 0.03257164 |
| ENSG00000163605 | PPP4R2     | -1.695595  | 0.00032825 |
| ENSG00000169895 | SYAP1      | -1.6955365 | 0.01716858 |
| ENSG00000087206 | UIMC1      | -1.6949801 | 0.00035769 |
| ENSG00000013441 | CLK1       | -1.694474  | 0.00031514 |
| ENSG00000171988 | JMJD1C     | -1.6918273 | 0.00078546 |
| ENSG00000075415 | SLC25A3    | -1.6912662 | 0.00151518 |
| ENSG00000124486 | USP9X      | -1.6910736 | 0.00016587 |
| ENSG00000259330 | INAFM2     | -1.6891145 | 0.00217509 |
| ENSG00000188215 | DCUN1D3    | -1.6882633 | 0.00039781 |
| ENSG00000231259 | AC125232.1 | -1.6869602 | 0.01216003 |
| ENSG00000197818 | SLC9A8     | -1.6864555 | 0.01216003 |
| ENSG00000114120 | SLC25A36   | -1.6853343 | 0.00396268 |
| ENSG00000008256 | CYTH3      | -1.6823948 | 0.00671091 |
| ENSG00000102225 | CDK16      | -1.68182   | 0.0067314  |
| ENSG00000122862 | SRGN       | -1.6814337 | 0.00363392 |
| ENSG00000150907 | FOXO1      | -1.6803792 | 0.0011299  |
| ENSG00000197063 | MAFG       | -1.6756863 | 0.01274117 |
| ENSG00000067182 | TNFRSF1A   | -1.6720402 | 1.2095E-05 |
| ENSG00000150457 | LATS2      | -1.6711013 | 0.00114234 |
| ENSG00000165813 | CCDC186    | -1.6705424 | 0.00225444 |
| ENSG00000166484 | MAPK7      | -1.6667525 | 0.0052913  |
| ENSG00000143514 | TP53BP2    | -1.6645397 | 0.00098261 |

|                 |            |            |            |
|-----------------|------------|------------|------------|
| ENSG00000168615 | ADAM9      | -1.6638168 | 0.0008965  |
| ENSG00000135093 | USP30      | -1.6631448 | 0.00340911 |
| ENSG00000072364 | AFF4       | -1.6623323 | 3.816E-06  |
| ENSG00000102119 | EMD        | -1.6621668 | 0.00070482 |
| ENSG00000214174 | AMZ2P1     | -1.6618303 | 0.00776543 |
| ENSG00000188994 | ZNF292     | -1.6564893 | 0.01019047 |
| ENSG00000126767 | ELK1       | -1.6562438 | 7.4197E-05 |
| ENSG00000131408 | NR1H2      | -1.6550241 | 0.00025405 |
| ENSG00000167703 | SLC43A2    | -1.6507063 | 0.01025104 |
| ENSG00000105325 | FZR1       | -1.6463611 | 0.00941259 |
| ENSG00000117036 | ETV3       | -1.6441059 | 0.0422585  |
| ENSG00000130517 | PGPEP1     | -1.640259  | 0.00108282 |
| ENSG00000159346 | ADIPOR1    | -1.6401029 | 0.00077849 |
| ENSG00000117569 | PTBP2      | -1.6397044 | 0.00083979 |
| ENSG00000118707 | TGIF2      | -1.6382022 | 0.00171347 |
| ENSG00000123066 | MED13L     | -1.636608  | 0.00066794 |
| ENSG00000176170 | SPHK1      | -1.6363195 | 0.0084539  |
| ENSG00000130695 | CEP85      | -1.6359461 | 0.00590266 |
| ENSG00000102908 | NFAT5      | -1.6359083 | 0.00269425 |
| ENSG00000140044 | JDP2       | -1.6348555 | 0.01099759 |
| ENSG00000109332 | UBE2D3     | -1.6330588 | 0.00072397 |
| ENSG00000175197 | DDIT3      | -1.632968  | 0.033075   |
| ENSG00000135503 | ACVR1B     | -1.6323848 | 0.0008674  |
| ENSG00000087087 | SRRT       | -1.629347  | 0.01770152 |
| ENSG00000150403 | TMCO3      | -1.6286247 | 0.00081798 |
| ENSG00000178607 | ERN1       | -1.6281895 | 0.00018294 |
| ENSG00000105856 | HBP1       | -1.6271893 | 0.00005434 |
| ENSG00000267520 | AC010733.2 | -1.6271018 | 0.00235373 |
| ENSG00000140379 | BCL2A1     | -1.6264128 | 0.00184798 |
| ENSG00000197386 | HTT        | -1.6249569 | 0.03190124 |
| ENSG00000280987 | MATR3      | -1.6242489 | 0.03360204 |
| ENSG00000056972 | TRAF3IP2   | -1.6234054 | 0.00461753 |
| ENSG00000111011 | RSRC2      | -1.6228625 | 0.00059557 |
| ENSG00000135968 | GCC2       | -1.6219996 | 0.00934996 |
| ENSG00000147526 | TACC1      | -1.6202835 | 0.0013507  |
| ENSG00000005486 | RHBDD2     | -1.6201412 | 0.01186484 |
| ENSG00000115165 | CYTIP      | -1.6199146 | 0.00976103 |
| ENSG00000172766 | NAA16      | -1.6173609 | 0.00064718 |
| ENSG00000145860 | RNF145     | -1.6171896 | 0.00100657 |
| ENSG00000156381 | ANKRD9     | -1.6163393 | 0.02888984 |
| ENSG00000069399 | BCL3       | -1.6159176 | 0.01288218 |
| ENSG00000143373 | ZNF687     | -1.6152912 | 0.03419193 |

|                 |          |            |            |
|-----------------|----------|------------|------------|
| ENSG00000116584 | ARHGEF2  | -1.6134978 | 0.01483446 |
| ENSG00000179051 | RCC2     | -1.6127476 | 0.01160789 |
| ENSG00000124766 | SOX4     | -1.6114084 | 0.00223409 |
| ENSG00000044574 | HSPA5    | -1.6099202 | 0.00492287 |
| ENSG00000145979 | TBC1D7   | -1.6092439 | 0.00847841 |
| ENSG00000139433 | GLTP     | -1.6066986 | 0.00417663 |
| ENSG00000138867 | GUCD1    | -1.6063594 | 0.00169689 |
| ENSG00000198925 | ATG9A    | -1.6058816 | 0.00784433 |
| ENSG00000032219 | ARID4A   | -1.6058472 | 0.00016587 |
| ENSG00000241839 | PLEKHO2  | -1.6046012 | 0.00403476 |
| ENSG00000100221 | JOSD1    | -1.6035386 | 0.01667953 |
| ENSG00000114098 | ARMC8    | -1.6017833 | 7.5228E-05 |
| ENSG00000178623 | GPR35    | -1.6007657 | 0.0312656  |
| ENSG00000136830 | FAM129B  | -1.5973004 | 0.00921876 |
| ENSG00000005483 | KMT2E    | -1.5948804 | 0.00019371 |
| ENSG00000136807 | CDK9     | -1.5938694 | 0.00702732 |
| ENSG00000105655 | ISYNA1   | -1.5926978 | 0.00582601 |
| ENSG00000138434 | SSFA2    | -1.5911581 | 0.00017899 |
| ENSG00000115956 | PLEK     | -1.591103  | 0.0025654  |
| ENSG00000055208 | TAB2     | -1.5910037 | 0.00017634 |
| ENSG00000120690 | ELF1     | -1.589289  | 0.0006017  |
| ENSG00000107937 | GTPBP4   | -1.5890128 | 0.00428685 |
| ENSG00000023330 | ALAS1    | -1.5889304 | 0.04777731 |
| ENSG00000115339 | GALNT3   | -1.587047  | 0.01936306 |
| ENSG00000152409 | JMY      | -1.586805  | 0.00037088 |
| ENSG00000270069 | MIR222HG | -1.5859323 | 0.00096657 |
| ENSG00000116260 | QSOX1    | -1.5833351 | 0.00220839 |
| ENSG00000043093 | DCUN1D1  | -1.5832245 | 0.00075096 |
| ENSG00000197122 | SRC      | -1.5803507 | 0.00058719 |
| ENSG00000135241 | PNPLA8   | -1.5795546 | 0.0024376  |
| ENSG00000124782 | RREB1    | -1.5782724 | 0.00106505 |
| ENSG00000127824 | TUBA4A   | -1.5779967 | 0.00708238 |
| ENSG00000198369 | SPRED2   | -1.5763408 | 0.0016113  |
| ENSG00000151247 | EIF4E    | -1.5752877 | 0.0004212  |
| ENSG00000173960 | UBXN2A   | -1.5744389 | 0.00037874 |
| ENSG00000184428 | TOP1MT   | -1.5739683 | 0.01145314 |
| ENSG00000240053 | LY6G5B   | -1.5730019 | 0.00483369 |
| ENSG00000140743 | CDR2     | -1.5723227 | 0.00416262 |
| ENSG00000168066 | SF1      | -1.5711265 | 0.00248889 |
| ENSG00000160179 | ABCG1    | -1.5694762 | 0.00069117 |
| ENSG00000064961 | HMG20B   | -1.5673559 | 0.00040591 |
| ENSG00000154124 | OTULIN   | -1.5673035 | 0.00123872 |

|                 |            |            |            |
|-----------------|------------|------------|------------|
| ENSG00000181222 | POLR2A     | -1.566575  | 0.00159885 |
| ENSG00000076108 | BAZ2A      | -1.5661032 | 0.00076885 |
| ENSG00000076604 | TRAF4      | -1.5658535 | 0.01836102 |
| ENSG00000074416 | MGLL       | -1.5650616 | 0.02306784 |
| ENSG00000159082 | SYNJ1      | -1.5626197 | 0.00604553 |
| ENSG00000153561 | RMND5A     | -1.5626103 | 0.00119944 |
| ENSG00000186469 | GNG2       | -1.5612618 | 0.01606603 |
| ENSG00000152700 | SAR1B      | -1.5608848 | 0.00029457 |
| ENSG00000239857 | GET4       | -1.559559  | 0.0017433  |
| ENSG00000113712 | CSNK1A1    | -1.5593144 | 0.00022731 |
| ENSG00000260708 | AL118516.1 | -1.5586566 | 0.00633623 |
| ENSG00000102007 | PLP2       | -1.5573676 | 0.00035647 |
| ENSG00000112033 | PPARD      | -1.5559943 | 0.00175002 |
| ENSG00000147439 | BIN3       | -1.555449  | 0.00188738 |
| ENSG00000198833 | UBE2J1     | -1.5532614 | 0.00794965 |
| ENSG00000137817 | PARP6      | -1.5530293 | 0.00011008 |
| ENSG00000105968 | H2AFV      | -1.5522882 | 0.00025717 |
| ENSG00000117614 | SYF2       | -1.5513175 | 8.5435E-05 |
| ENSG00000155508 | CNOT8      | -1.5510955 | 0.001272   |
| ENSG00000162923 | WDR26      | -1.5504078 | 0.00013674 |
| ENSG00000116285 | ERRFI1     | -1.5503939 | 0.00773351 |
| ENSG00000164169 | PRMT9      | -1.5500579 | 0.00051771 |
| ENSG00000113575 | PPP2CA     | -1.5499641 | 0.00062165 |
| ENSG00000197780 | TAF13      | -1.5496012 | 0.00091009 |
| ENSG00000262246 | CORO7      | -1.5483429 | 0.00958444 |
| ENSG00000166233 | ARIH1      | -1.5479744 | 0.00015176 |
| ENSG00000244486 | SCARF2     | -1.5463953 | 0.0210235  |
| ENSG00000128989 | ARPP19     | -1.5457656 | 0.00077102 |
| ENSG00000164543 | STK17A     | -1.5455914 | 0.0392918  |
| ENSG00000131759 | RARA       | -1.5448456 | 0.01590993 |
| ENSG00000276107 | AC037198.2 | -1.5440499 | 0.00238135 |
| ENSG00000139636 | LMBR1L     | -1.5439465 | 0.00464824 |
| ENSG00000167604 | NFKBID     | -1.5436091 | 0.00256234 |
| ENSG00000197405 | C5AR1      | -1.542184  | 0.00477562 |
| ENSG00000070495 | JMJD6      | -1.5394051 | 0.0030835  |
| ENSG00000092847 | AGO1       | -1.5393011 | 0.00526619 |
| ENSG00000105821 | DNAJC2     | -1.5391475 | 0.00675342 |
| ENSG00000119048 | UBE2B      | -1.5368156 | 0.00043714 |
| ENSG00000156671 | SAMD8      | -1.5360163 | 0.00349533 |
| ENSG00000139505 | MTMR6      | -1.5350177 | 0.00115962 |
| ENSG00000164548 | TRA2A      | -1.5338747 | 0.00011163 |
| ENSG00000029993 | HMGB3      | -1.5316349 | 0.01029999 |

|                 |            |            |            |
|-----------------|------------|------------|------------|
| ENSG00000185947 | ZNF267     | -1.5298207 | 0.00454279 |
| ENSG00000273356 | LINC02019  | -1.5292778 | 0.00119944 |
| ENSG00000141985 | SH3GL1     | -1.5280713 | 0.00588359 |
| ENSG00000128272 | ATF4       | -1.5280042 | 5.2951E-05 |
| ENSG00000172216 | CEBPB      | -1.527772  | 0.02014986 |
| ENSG00000158669 | GPAT4      | -1.5268625 | 0.00166041 |
| ENSG00000188070 | C11orf95   | -1.5266466 | 0.02506593 |
| ENSG00000111252 | SH2B3      | -1.5263865 | 0.00860229 |
| ENSG00000065357 | DGKA       | -1.5260897 | 0.0002973  |
| ENSG00000167671 | UBXN6      | -1.5259656 | 0.00109223 |
| ENSG00000169905 | TOR1AIP2   | -1.5249436 | 0.00597502 |
| ENSG00000147119 | CHST7      | -1.5236811 | 0.00789381 |
| ENSG00000167034 | NKX3-1     | -1.5236105 | 0.00062255 |
| ENSG00000161638 | ITGA5      | -1.5223195 | 4.6944E-05 |
| ENSG00000154359 | LONRF1     | -1.5210642 | 0.00063116 |
| ENSG00000143067 | ZNF697     | -1.5168708 | 7.6536E-05 |
| ENSG00000230551 | AC021078.1 | -1.5167031 | 0.00229423 |
| ENSG00000166974 | MAPRE2     | -1.5133908 | 0.00017899 |
| ENSG00000179119 | SPTY2D1    | -1.512944  | 0.00042489 |
| ENSG00000067596 | DHX8       | -1.512099  | 0.00033588 |
| ENSG00000137876 | RSL24D1    | -1.5114195 | 0.00105092 |
| ENSG00000137947 | GTF2B      | -1.510406  | 0.00011985 |
| ENSG00000108669 | CYTH1      | -1.505954  | 0.00110115 |
| ENSG00000149782 | PLCB3      | -1.5047599 | 0.00626591 |
| ENSG00000144711 | IQSEC1     | -1.50364   | 0.0020674  |
| ENSG00000133794 | ARNTL      | -1.5018533 | 0.00050819 |
| ENSG00000067900 | ROCK1      | -1.5006315 | 0.00019992 |



**Appendix Table S5. Reagents and Tools Table**

| <b>Reagent/Resource</b>          | <b>Reference or Source</b>    | <b>Identifier or Catalog Number</b> |
|----------------------------------|-------------------------------|-------------------------------------|
| <b>Experimental Models</b>       |                               |                                     |
| C57BL/6 Tyk2 <sup>-/-</sup> mice | Dr. M. Müller, Viena, Austria |                                     |
| C57BL/6 mice                     | Jackson Lab.                  |                                     |
| K562-GFP line cell               | NIH Reagent Program           | 116799                              |
| <b>Recombinant DNA</b>           |                               |                                     |
| <b>Antibodies</b>                |                               |                                     |
| Anti-human CD3                   | Biologend                     | 300327                              |
| Anti-human CD19                  | Biologend                     | 363015                              |
| Anti-human CD20                  | Biologend                     | 302325                              |
| Anti-human CD56                  | Biologend                     | 362505                              |
| Anti-human CD14                  | BD Bioscience                 | 557831                              |
| Anti-human CD16                  | Biologend                     | 302021                              |
| Anti-human CD56                  | Biologend                     | 362524                              |
| Anti-human HLA-DR                | Biologend                     | 307623                              |
| Anti-human CD11c                 | Biologend                     | 301625                              |
| Anti-human MICA/B                | Biologend                     | 320912                              |
| Anti-human CD40                  | Biologend                     | 334306                              |
| Anti-human CD86                  | Biologend                     | 374210                              |
| Anti-human IFN $\gamma$          | Biologend                     | 554551                              |
| Anti-human CD141                 | Biologend                     | 344105                              |
| Anti-human TNFa                  | Biologend                     | 502923                              |
| Anti-human CD107a                | Biologend                     | 328620                              |
| Anti-human CD1c                  | Biologend                     | 331515                              |
| Anti-human CD64                  | Biologend                     | 305131                              |
| Anti-human ULBP1                 | RyD systems                   | FAB1380P                            |
| Anti-human CD1c                  | BD Bioscience                 | 564900                              |
| Anti-human PCNA                  | Biologend                     | 307904                              |
| Streptavidin                     | BD Bioscience                 | 561419                              |
| Anti-human HLADR                 | Biologend                     | 307618                              |
| Anti-human CD3                   | Biologend                     | 300317                              |
| Anti-human CD19                  | Biologend                     | 302217                              |
| Anti-human NKG2A                 | RyD Systems                   | FAB1059C-025                        |
| Anti-human NKG2D                 | Biologend                     | 320819                              |

|                                   |                   |              |
|-----------------------------------|-------------------|--------------|
| Anti-human NKp30                  | Biolegend         | 325213       |
| Anti-human PD-L1                  | Biolegend         | 329721       |
| Anti-human CD14                   | Biolegend         | 367113       |
| Anti-human CD123                  | BD Bioscience     | 560087       |
| Anti-human CD86                   | Biolegend         | 305427       |
| Anti-human CD16                   | Biolegend         | 302045       |
| Ghost Dye <sup>TM</sup>           | Tonbo Biosciences | 13-0865-T100 |
| Yellow fluorescent reactive dye   | Invitrogen        | L34959 A     |
| Anti-mouse MHCII                  | Biolegend         | 107652       |
| Anti-mouse CD3                    | Tonbo Biosciences | 35-0031      |
| Anti-mouse CD11b                  | Tonbo Biosciences | 75-0112      |
| Anti-mouse CD27                   | Biolegend         | 124216       |
| Anti-mouse NK1.1                  | Tonbo Biosciences | 50-5941      |
| Anti-mouse CD45.2                 | eBioscience       | 17-0454-81   |
| Anti-mouse CD64                   | BD Bioscience     | 558539       |
| Anti-mouse MHCII                  | BD Bioscience     | 553623       |
| Anti-mouse CD11c                  | BD Bioscience     | 565452       |
| Anti-mouse CD11b                  | eBioscience       | 25-0112-81   |
| Anti-mouse XCR1                   | Biolegend         | 148224       |
| Anti-mouse Ly6C                   | BD Bioscience     | 560525       |
| Anti-mouse CD3                    | BD Bioscience     | 563123       |
| Anti-mouse CD107a                 | Biolegend         | 121610       |
| Anti-mouse IFN $\gamma$           | eBioscience       | 11-7311-82   |
| Anti-mouse CD45.2                 | BD Bioscience     | 563686       |
| Anti-mouse NKG2D                  | ThermoFisher      | 46-5882-82   |
| Anti-mouse RAE-1                  | Biolegend         | 748218       |
| Goat anti-human MICa/b            | RyD Systems       | MAB13001     |
| Human IL-15 Antibody              | RyD - Biotechne   | MAB2471-100  |
| IgG2b Isotype Control             | BioLegend         | 402202       |
| IgG1 Isotype Control              | BioLegend         | 401402       |
| Violet Cell Proliferation Tracker | ThermoFisher      | C34557       |
| Mouse anti-human CD56             | Invitrogen        | MA1-06801    |
| Goat anti-human CD56              | RyD Systems       | AF2408       |
| Mouse anti-human CD1c             | abcam             | Ab156708     |
| Rabbit anti-human HLA Class II    | abcam             | Ab133578     |
| Rat anti-human CD19               | Invitrogen        | 14-0194-80   |
| Goat anti-human IL-17a            | RyD Systems       | AF-317-SP    |
| Goat anti-human MICa/b            | RyD Systems       | MAB13001     |

|                                                           |                        |                  |
|-----------------------------------------------------------|------------------------|------------------|
| Granzyme B antibody                                       | Thermo Fisher          | 14-8889-80       |
| Donkey anti-rabbit AF488                                  | Thermo Fisher          | R37118           |
| Donkey anti-goat AF488                                    | Thermo Fisher          | A-11055          |
| Donkey anti-rat AF594                                     | Jackson ImmunoResearch | 712-586-150      |
| Donkey anti-goat AF568                                    | Thermo Fisher          | A-11057          |
| Donkey anti-goat AF647                                    | Thermo Fisher          | A-21447          |
| Donkey anti-mouse AF647                                   | Thermo Fisher          | A-31571          |
| Rabbit anti-mouse PAX5 antibody                           | Abcam                  | Ab109443         |
| <b>Oligonucleotides and other sequence-based reagents</b> |                        |                  |
| <i>Human DDX60</i>                                        | This study             | Methods          |
| <i>Human DDX58 (RIG-I)</i>                                | This study             | Methods          |
| <i>Human IFIT1</i>                                        | This study             | Methods          |
| <i>Human STAT1</i>                                        | This study             | Methods          |
| <i>Human IL-15</i>                                        | This study             | Methods          |
| <i>Human DDX60 siRNA SMART pool</i>                       | Dharmacon              | L-017664-01-0005 |
| <i>Human DDX58 (RIG-I) siRNA SMART pool</i>               | Dharmacon              | L-012511-00-0005 |
| <i>Human IFIT1 siRNA SMART pool</i>                       | Dharmacon              | L-019616-00-0005 |
| <i>Human STAT1 siRNA SMART pool</i>                       | Dharmacon              | L-003543-00-0005 |
| <b>Chemicals, Enzymes and other reagents</b>              |                        |                  |
| Polyinosinic-polycytidylic acid sodium salt (poly I:C)    | Merck- Sigma           | P1530            |
| Brefeldin A                                               | Sigma-Aldrich (Merck)  | B7651            |
| Monensin                                                  | Sigma-Aldrich (Merck)  |                  |
| Liberase TL                                               | Roche                  | 5401020001       |
| DNAase I                                                  | Roche                  | 11284932001      |
| Pilocarpine hydrochloride                                 | Sigma-Aldrich (Merck)  | 54-71-7          |
| Ketamina 100 mg/ml                                        | Pfizer                 | 47034            |
| Xilacina 20mg/ml                                          | CALIER                 | Ref. 20100-005   |
| Anti-PE MicroBeads                                        | Miltenyi Biotec        | 130-048-801      |
| Easy step human NK cell Isolation Kit                     | Stemcell               | 17955            |
| Easy step™ human myeloid DC enrichment kit                | Stemcell               | 19061            |
| CD11c MicroBeads UltraPure, mouse                         | Miltenyi Biotec        | 130-108-338      |
| PMA                                                       | Sigma Aldrich (Merck)  | P1585            |
| Ionomycin                                                 | Sigma Aldrich (Merck)  | I0634-1MG        |
| <b>Software</b>                                           |                        |                  |
| QuPath v0.4.3                                             |                        |                  |
| FlowJo v10                                                |                        |                  |
| Image J                                                   |                        |                  |
| Gradpad Prism 9.0                                         |                        |                  |

| <b>Other</b>           |               |  |
|------------------------|---------------|--|
| Illumina NextSeq       | San Diego, CA |  |
| Zeiss microscopy       |               |  |
| Leica TCS SP5 confocal | Leica         |  |
